# Supplementary material for: Regulatory Modules Involved in the Degradation and Modification of Host Cell Walls During Cuscuta campestris Invasion
Source: Front Plant Sci. 2022 Jul 6;13:904313. doi: 10.3389/fpls.2022.904313 (PMC9298654; doi:10.3389/fpls.2022.904313)
Supplement: Supplementary file 2 [file Table_1.XLSX]

## Sheet: Sheet1
Supplemental Table 1: List of all TF genes in C. campestris.
Gene ID	Description	Family name*
Cc046124	RNA biosynthesis.transcription factor families.AP2/ERF superfamily.AP2-type	AP2
Cc009308	RNA biosynthesis.transcription factor families.AP2/ERF superfamily.AP2-type	AP2
Cc013991	RNA biosynthesis.transcription factor families.AP2/ERF superfamily.AP2-type	AP2
Cc030958	RNA biosynthesis.transcription factor families.AP2/ERF superfamily.AP2-type	AP2
Cc046309	RNA biosynthesis.transcription factor families.AP2/ERF superfamily.AP2-type	AP2
Cc045866	RNA biosynthesis.transcription factor families.AP2/ERF superfamily.AP2-type	AP2
Cc000114	RNA biosynthesis.transcription factor families.AP2/ERF superfamily.AP2-type	AP2
Cc022609	RNA biosynthesis.transcription factor families.AP2/ERF superfamily.AP2-type	AP2
Cc006081	RNA biosynthesis.transcription factor families.AP2/ERF superfamily.AP2-type	AP2
Cc025997	RNA biosynthesis.transcription factor families.AP2/ERF superfamily.AP2-type	AP2
Cc021893	RNA biosynthesis.transcription factor families.AP2/ERF superfamily.AP2-type	AP2
Cc018667	RNA biosynthesis.transcription factor families.AP2/ERF superfamily.AP2-type	AP2
Cc005069	RNA biosynthesis.transcription factor families.AP2/ERF superfamily.AP2-type	AP2
Cc034258	RNA biosynthesis.transcription factor families.AP2/ERF superfamily.AP2-type	AP2
Cc023216	RNA biosynthesis.transcription factor families.AP2/ERF superfamily.AP2-type	AP2
Cc018528	RNA biosynthesis.transcription factor families.AP2/ERF superfamily.AP2-type	AP2
Cc013402	RNA biosynthesis.transcription factor families.AP2/ERF superfamily.AP2-type	AP2
Cc003817	RNA biosynthesis.transcription factor families.AP2/ERF superfamily.AP2-type	AP2
Cc004118	RNA biosynthesis.transcription factor families.AP2/ERF superfamily.AP2-type	AP2
Cc020936	RNA biosynthesis.transcription factor families.AP2/ERF superfamily.AP2-type	AP2
Cc001101	RNA biosynthesis.transcription factor families.AP2/ERF superfamily.AP2-type	AP2
Cc036597	RNA biosynthesis.transcription factor families.AP2/ERF superfamily.AP2-type	AP2
Cc047354	RNA biosynthesis.transcription factor families.AP2/ERF superfamily.AP2-type	AP2
Cc037319	RNA biosynthesis.transcription factor families.AP2/ERF superfamily.AP2-type	AP2
Cc005573	RNA biosynthesis.transcription factor families.AP2/ERF superfamily.DREB-type	AP2
Cc035227	RNA biosynthesis.transcription factor families.AP2/ERF superfamily.ERF-type	AP2
Cc029977	RNA biosynthesis.transcription factor families.AP2/ERF superfamily.ERF-type	AP2
Cc018199	RNA biosynthesis.transcription factor families.AP2/ERF superfamily.ERF-type	AP2
Cc046773	RNA biosynthesis.transcription factor families.AP2/ERF superfamily.ERF-type	AP2
Cc001475	RNA biosynthesis.transcription factor families.AP2/ERF superfamily.ERF-type	AP2
Cc027811	RNA biosynthesis.transcription factor families.B3 superfamily.ARF	ARF
Cc044235	RNA biosynthesis.transcription factor families.B3 superfamily.ARF	ARF
Cc031191	RNA biosynthesis.transcription factor families.B3 superfamily.ARF	ARF
Cc027677	RNA biosynthesis.transcription factor families.B3 superfamily.ARF	ARF
Cc041735	RNA biosynthesis.transcription factor families.B3 superfamily.ARF	ARF
Cc047578	RNA biosynthesis.transcription factor families.B3 superfamily.ARF	ARF
Cc034367	RNA biosynthesis.transcription factor families.B3 superfamily.ARF	ARF
Cc017187	RNA biosynthesis.transcription factor families.B3 superfamily.ARF	ARF
Cc008622	RNA biosynthesis.transcription factor families.B3 superfamily.ARF	ARF
Cc008555	RNA biosynthesis.transcription factor families.B3 superfamily.ARF	ARF
Cc014754	RNA biosynthesis.transcription factor families.B3 superfamily.ARF	ARF
Cc002903	RNA biosynthesis.transcription factor families.B3 superfamily.ARF	ARF
Cc007125	RNA biosynthesis.transcription factor families.B3 superfamily.ARF	ARF
Cc028022	RNA biosynthesis.transcription factor families.B3 superfamily.ARF	ARF
Cc013895	RNA biosynthesis.transcription factor families.B3 superfamily.ARF	ARF
Cc012271	RNA biosynthesis.transcription factor families.B3 superfamily.ARF	ARF
Cc016387	RNA biosynthesis.transcription factor families.B3 superfamily.ARF	ARF
Cc002637	RNA biosynthesis.transcription factor families.B3 superfamily.ARF	ARF
Cc017519	RNA biosynthesis.transcription factor families.B3 superfamily.ARF	ARF
Cc008678	RNA biosynthesis.transcription factor families.B3 superfamily.ARF	ARF
Cc002782	RNA biosynthesis.transcription factor families.B3 superfamily.ARF	ARF
Cc018629	RNA biosynthesis.transcription factor families.B3 superfamily.ARF	ARF
Cc006548	RNA biosynthesis.transcription factor families.B3 superfamily.ARF	ARF
Cc035111	RNA biosynthesis.transcription factor families.B3 superfamily.ARF	ARF
Cc006326	RNA biosynthesis.transcription factor families.B3 superfamily.ARF	ARF
Cc002622	RNA biosynthesis.transcription factor families.B3 superfamily.ARF	ARF
Cc036604	RNA biosynthesis.transcription factor families.B3 superfamily.ARF	ARF
Cc032975	RNA biosynthesis.transcription factor families.B3 superfamily.ARF	ARF
Cc030587	hypothetical protein	ARF
Cc044871	RNA biosynthesis.transcription factor families.MYB superfamily.G2-like	ARR-B
Cc024708	Phytohormones.cytokinin.perception and signal transduction.B-type	ARR-B
Cc015843	Phytohormones.cytokinin.perception and signal transduction.B-type	ARR-B
Cc021456	Phytohormones.cytokinin.perception and signal transduction.B-type	ARR-B
Cc001204	Phytohormones.cytokinin.perception and signal transduction.B-type	ARR-B
Cc027369	Phytohormones.cytokinin.perception and signal transduction.B-type	ARR-B
Cc023624	Phytohormones.cytokinin.perception and signal transduction.B-type	ARR-B
Cc029357	Phytohormones.cytokinin.perception and signal transduction.B-type	ARR-B
Cc044607	Phytohormones.cytokinin.perception and signal transduction.B-type	ARR-B
Cc020081	Phytohormones.cytokinin.perception and signal transduction.B-type	ARR-B
Cc037310	RNA biosynthesis.transcription factor families.B3 superfamily.REM	B3
Cc047344	RNA biosynthesis.transcription factor families.B3 superfamily.REM	B3
Cc026358	RNA biosynthesis.transcription factor families.B3 superfamily.LAV-VAL	B3
Cc034839	RNA biosynthesis.transcription factor families.B3 superfamily.LAV-VAL	B3
Cc015165	RNA biosynthesis.transcription factor families.B3 superfamily.LAV-VAL	B3
Cc033815	RNA biosynthesis.transcription factor families.B3 superfamily.LAV-VAL	B3
Cc001018	RNA biosynthesis.transcription factor families.B3 superfamily.LAV-VAL	B3
Cc038079	RNA biosynthesis.transcription factor families.B3 superfamily.LAV-VAL	B3
Cc038078	hypothetical protein	B3
Cc015038	RNA biosynthesis.transcription factor families.B3 superfamily.LAV-ABI3	B3
Cc005133	RNA biosynthesis.transcription factor families.B3 superfamily.REM	B3
Cc024363	RNA biosynthesis.transcription factor families.B3 superfamily.REM	B3
Cc010654	RNA biosynthesis.transcription factor families.B3 superfamily.REM	B3
Cc026808	RNA biosynthesis.transcription factor families.B3 superfamily.REM	B3
Cc030273	RNA biosynthesis.transcription factor families.B3 superfamily.RAV/NGATHA	B3
Cc017815	RNA biosynthesis.transcription factor families.B3 superfamily.RAV/NGATHA	B3
Cc018428	RNA biosynthesis.transcription factor families.B3 superfamily.RAV/NGATHA	B3
Cc013340	RNA biosynthesis.transcription factor families.B3 superfamily.RAV/NGATHA	B3
Cc004940	RNA biosynthesis.transcription factor families.B3 superfamily.RAV/NGATHA	B3
Cc032567	RNA biosynthesis.transcription factor families.B3 superfamily.RAV/NGATHA	B3
Cc006642	RNA biosynthesis.transcription factor families.B3 superfamily.LAV-VAL	B3
Cc007033	RNA biosynthesis.transcription factor families.B3 superfamily.LAV-VAL	B3
Cc009638	RNA biosynthesis.transcription factor families.B3 superfamily.REM	B3
Cc034475	RNA biosynthesis.transcription factor families.BBR/BPC transcription	BBR-BPC
Cc035107	RNA biosynthesis.transcription factor families.BBR/BPC transcription	BBR-BPC
Cc047546	RNA biosynthesis.transcription factor families.BBR/BPC transcription	BBR-BPC
Cc017304	RNA biosynthesis.transcription factor families.BBR/BPC transcription	BBR-BPC
Cc027621	RNA biosynthesis.transcription factor families.BBR/BPC transcription	BBR-BPC
Cc023884	RNA biosynthesis.transcription factor families.BBR/BPC transcription	BBR-BPC
Cc001773	RNA biosynthesis.transcription factor families.BBR/BPC transcription	BBR-BPC
Cc046263	Phytohormones.brassinosteroid.perception and signal transduction.BES/BZR-type	BES
Cc015382	Phytohormones.brassinosteroid.perception and signal transduction.BES/BZR-type	BES
Cc017745	Phytohormones.brassinosteroid.perception and signal transduction.BES/BZR-type	BES
Cc023750	Phytohormones.brassinosteroid.perception and signal transduction.BES/BZR-type	BES
Cc044075	Phytohormones.brassinosteroid.perception and signal transduction.BES/BZR-type	BES
Cc033084	Phytohormones.brassinosteroid.perception and signal transduction.BES/BZR-type	BES
Cc026989	Phytohormones.brassinosteroid.perception and signal transduction.BES/BZR-type	BES
Cc030545	hypothetical protein	BES
Cc009911	Carbohydrate metabolism.starch metabolism.degradation.hydrolysis	BES
Cc008422	Carbohydrate metabolism.starch metabolism.degradation.hydrolysis	BES
Cc018381	Carbohydrate metabolism.starch metabolism.degradation.hydrolysis	BES
Cc023392	Carbohydrate metabolism.starch metabolism.degradation.hydrolysis	BES
Cc015426	Carbohydrate metabolism.starch metabolism.degradation.hydrolysis	BES
Cc000630	hypothetical protein	BES
Cc014103	Phytohormones.brassinosteroid.perception and signal transduction.BES/BZR-type	BES
Cc023689	Protein biosynthesis.aminoacyl-tRNA synthetase activities.glutamine-tRNA	bHLH
Cc014036	Protein biosynthesis.aminoacyl-tRNA synthetase activities.glutamine-tRNA	bHLH
Cc008359	RNA biosynthesis.transcription factor families.bHLH transcription	bHLH
Cc009839	RNA biosynthesis.transcription factor families.bHLH transcription	bHLH
Cc011171	RNA biosynthesis.transcription factor families.bHLH transcription	bHLH
Cc020413	RNA biosynthesis.transcription factor families.bHLH transcription	bHLH
Cc008754	RNA biosynthesis.transcription factor families.bHLH transcription	bHLH
Cc042073	RNA biosynthesis.transcription factor families.bHLH transcription	bHLH
Cc015044	RNA biosynthesis.transcription factor families.bHLH transcription	bHLH
Cc005290	RNA biosynthesis.transcription factor families.bHLH transcription	bHLH
Cc034515	RNA biosynthesis.transcription factor families.bHLH transcription	bHLH
Cc047507	RNA biosynthesis.transcription factor families.bHLH transcription	bHLH
Cc017472	RNA biosynthesis.transcription factor families.bHLH transcription	bHLH
Cc005788	RNA biosynthesis.transcription factor families.bHLH transcription	bHLH
Cc001589	RNA biosynthesis.transcription factor families.bHLH transcription	bHLH
Cc038987	RNA biosynthesis.transcription factor families.bHLH transcription	bHLH
Cc038986	RNA biosynthesis.transcription factor families.bHLH transcription	bHLH
Cc005530	RNA biosynthesis.transcription factor families.bHLH transcription	bHLH
Cc000693	Protein biosynthesis.cytosolic ribosome.large subunit (LSU).LSU	bHLH
Cc041457	Protein biosynthesis.cytosolic ribosome.large subunit (LSU).LSU	bHLH
Cc032598	Protein biosynthesis.cytosolic ribosome.large subunit (LSU).LSU	bHLH
Cc038577	RNA biosynthesis.transcription factor families.bHLH transcription	bHLH
Cc014044	RNA biosynthesis.transcription factor families.bHLH transcription	bHLH
Cc023697	RNA biosynthesis.transcription factor families.bHLH transcription	bHLH
Cc046394	RNA biosynthesis.transcription factor families.bHLH transcription	bHLH
Cc045970	RNA biosynthesis.transcription factor families.bHLH transcription	bHLH
Cc044029	RNA biosynthesis.transcription factor families.bHLH transcription	bHLH
Cc026915	RNA biosynthesis.transcription factor families.bHLH transcription	bHLH
Cc031024	RNA biosynthesis.transcription factor families.bHLH transcription	bHLH
Cc017909	RNA biosynthesis.transcription factor families.bHLH transcription	bHLH
Cc027422	RNA biosynthesis.transcription factor families.bHLH transcription	bHLH
Cc028562	RNA biosynthesis.transcription factor families.bHLH transcription	bHLH
Cc011713	RNA biosynthesis.transcription factor families.bHLH transcription	bHLH
Cc026437	RNA biosynthesis.transcription factor families.bHLH transcription	bHLH
Cc009939	RNA biosynthesis.transcription factor families.bHLH transcription	bHLH
Cc008453	RNA biosynthesis.transcription factor families.bHLH transcription	bHLH
Cc015121	RNA biosynthesis.transcription factor families.bHLH transcription	bHLH
Cc034872	RNA biosynthesis.transcription factor families.bHLH transcription	bHLH
Cc011597	RNA biosynthesis.transcription factor families.bHLH transcription	bHLH
Cc013990	RNA biosynthesis.transcription factor families.bHLH transcription	bHLH
Cc032535	RNA biosynthesis.transcription factor families.bHLH transcription	bHLH
Cc032522	RNA biosynthesis.transcription factor families.bHLH transcription	bHLH
Cc030959	RNA biosynthesis.transcription factor families.bHLH transcription	bHLH
Cc021631	RNA biosynthesis.transcription factor families.bHLH transcription	bHLH
Cc008960	RNA biosynthesis.transcription factor families.bHLH transcription	bHLH
Cc012795	RNA biosynthesis.transcription factor families.bHLH transcription	bHLH
Cc016291	RNA biosynthesis.transcription factor families.bHLH transcription	bHLH
Cc044888	RNA biosynthesis.transcription factor families.bHLH transcription	bHLH
Cc035205	RNA biosynthesis.transcription factor families.bHLH transcription	bHLH
Cc017913	RNA biosynthesis.transcription factor families.bHLH transcription	bHLH
Cc037110	RNA biosynthesis.transcription factor families.bHLH transcription	bHLH
Cc046128	RNA biosynthesis.transcription factor families.bHLH transcription	bHLH
Cc009312	RNA biosynthesis.transcription factor families.bHLH transcription	bHLH
Cc032297	RNA biosynthesis.transcription factor families.bHLH transcription	bHLH
Cc014581	RNA biosynthesis.transcription factor families.bHLH transcription	bHLH
Cc032564	RNA biosynthesis.transcription factor families.bHLH transcription	bHLH
Cc004934	RNA biosynthesis.transcription factor families.bHLH transcription	bHLH
Cc004907	RNA biosynthesis.transcription factor families.bHLH transcription	bHLH
Cc007259	RNA biosynthesis.transcription factor families.bHLH transcription	bHLH
Cc045995	RNA biosynthesis.transcription factor families.bHLH transcription	bHLH
Cc046410	RNA biosynthesis.transcription factor families.bHLH transcription	bHLH
Cc005659	RNA biosynthesis.transcription factor families.bHLH transcription	bHLH
Cc030029	RNA biosynthesis.transcription factor families.bHLH transcription	bHLH
Cc043982	RNA biosynthesis.transcription factor families.bHLH transcription	bHLH
Cc018279	RNA biosynthesis.transcription factor families.bHLH transcription	bHLH
Cc005224	RNA biosynthesis.transcription factor families.bHLH transcription	bHLH
Cc044021	RNA biosynthesis.transcription factor families.bHLH transcription	bHLH
Cc025310	RNA biosynthesis.transcription factor families.bHLH transcription	bHLH
Cc011657	RNA biosynthesis.transcription factor families.bHLH transcription	bHLH
Cc018571	RNA biosynthesis.transcription factor families.bHLH transcription	bHLH
Cc045047	RNA biosynthesis.transcription factor families.bHLH transcription	bHLH
Cc000729	RNA biosynthesis.transcription factor families.bHLH transcription	bHLH
Cc037689	RNA biosynthesis.transcription factor families.bHLH transcription	bHLH
Cc034972	RNA biosynthesis.transcription factor families.bHLH transcription	bHLH
Cc041487	RNA biosynthesis.transcription factor families.bHLH transcription	bHLH
Cc041489	RNA biosynthesis.transcription factor families.bHLH transcription	bHLH
Cc045096	RNA biosynthesis.transcription factor families.bHLH transcription	bHLH
Cc007961	RNA biosynthesis.transcription factor families.bZIP superfamily.bZIP	bZIP
Cc024857	RNA biosynthesis.transcription factor families.bZIP superfamily.bZIP	bZIP
Cc005542	RNA biosynthesis.transcription factor families.bZIP superfamily.bZIP	bZIP
Cc036650	RNA biosynthesis.transcription factor families.bZIP superfamily.bZIP	bZIP
Cc004029	RNA biosynthesis.transcription factor families.bZIP superfamily.bZIP	bZIP
Cc020854	RNA biosynthesis.transcription factor families.bZIP superfamily.bZIP	bZIP
Cc008267	RNA biosynthesis.transcription factor families.bZIP superfamily.bZIP	bZIP
Cc035566	RNA biosynthesis.transcription factor families.bZIP superfamily.bZIP	bZIP
Cc028286	RNA biosynthesis.transcription factor families.bZIP superfamily.bZIP	bZIP
Cc044230	RNA biosynthesis.transcription factor families.bZIP superfamily.bZIP	bZIP
Cc027808	RNA biosynthesis.transcription factor families.bZIP superfamily.bZIP	bZIP
Cc023914	RNA biosynthesis.transcription factor families.bZIP superfamily.bZIP	bZIP
Cc001804	RNA biosynthesis.transcription factor families.bZIP superfamily.bZIP	bZIP
Cc035805	RNA biosynthesis.transcription factor families.bZIP superfamily.bZIP	bZIP
Cc025140	RNA biosynthesis.transcription factor families.bZIP superfamily.bZIP	bZIP
Cc009833	RNA biosynthesis.transcription factor families.bZIP superfamily.bZIP	bZIP
Cc008352	RNA biosynthesis.transcription factor families.bZIP superfamily.bZIP19/23/24	bZIP
Cc031422	RNA biosynthesis.transcription factor families.bZIP superfamily.bZIP	bZIP
Cc002951	RNA biosynthesis.transcription factor families.bZIP superfamily.bZIP	bZIP
Cc047490	RNA biosynthesis.transcription factor families.bZIP superfamily.bZIP	bZIP
Cc034533	RNA biosynthesis.transcription factor families.bZIP superfamily.bZIP	bZIP
Cc009139	RNA biosynthesis.transcription factor families.bZIP superfamily.bZIP	bZIP
Cc036930	RNA biosynthesis.transcription factor families.bZIP superfamily.bZIP	bZIP
Cc009617	RNA biosynthesis.transcription factor families.bZIP superfamily.bZIP	bZIP
Cc014447	RNA biosynthesis.transcription factor families.bZIP superfamily.bZIP	bZIP
Cc002496	RNA biosynthesis.transcription factor families.bZIP superfamily.bZIP	bZIP
Cc010210	RNA biosynthesis.transcription factor families.bZIP superfamily.bZIP	bZIP
Cc007620	RNA biosynthesis.transcription factor families.bZIP superfamily.bZIP	bZIP
Cc025869	RNA biosynthesis.transcription factor families.bZIP superfamily.bZIP	bZIP
Cc008013	RNA biosynthesis.transcription factor families.bZIP superfamily.bZIP	bZIP
Cc028332	RNA biosynthesis.transcription factor families.bZIP superfamily.bZIP	bZIP
Cc017063	RNA biosynthesis.transcription factor families.bZIP superfamily.bZIP	bZIP
Cc028419	RNA biosynthesis.transcription factor families.bZIP superfamily.bZIP	bZIP
Cc046993	RNA biosynthesis.transcription factor families.bZIP superfamily.bZIP	bZIP
Cc023019	RNA biosynthesis.transcription factor families.bZIP superfamily.bZIP	bZIP
Cc045079	RNA biosynthesis.transcription factor families.bZIP superfamily.bZIP	bZIP
Cc001774	RNA biosynthesis.transcription factor families.bZIP superfamily.bZIP	bZIP
Cc023885	RNA biosynthesis.transcription factor families.bZIP superfamily.bZIP	bZIP
Cc025846	RNA biosynthesis.transcription factor families.bZIP superfamily.bZIP	bZIP
Cc008000	RNA biosynthesis.transcription factor families.bZIP superfamily.bZIP	bZIP
Cc020569	RNA biosynthesis.transcription factor families.bZIP superfamily.bZIP	bZIP
Cc035229	RNA biosynthesis.transcription factor families.bZIP superfamily.bZIP	bZIP
Cc000589	RNA biosynthesis.transcription factor families.bZIP superfamily.bZIP	bZIP
Cc003677	RNA biosynthesis.transcription factor families.bZIP superfamily.bZIP	bZIP
Cc047591	RNA biosynthesis.transcription factor families.bZIP superfamily.bZIP	bZIP
Cc009995	RNA biosynthesis.transcription factor families.bZIP superfamily.bZIP	bZIP
Cc017906	RNA biosynthesis.transcription factor families.bZIP superfamily.bZIP	bZIP
Cc036805	RNA biosynthesis.transcription factor families.bZIP superfamily.bZIP	bZIP
Cc024318	RNA biosynthesis.transcription factor families.bZIP superfamily.bZIP	bZIP
Cc005093	RNA biosynthesis.transcription factor families.bZIP superfamily.bZIP	bZIP
Cc019794	RNA biosynthesis.transcription factor families.bZIP superfamily.bZIP	bZIP
Cc027929	RNA biosynthesis.transcription factor families.bZIP superfamily.bZIP	bZIP
Cc005671	RNA biosynthesis.transcription factor families.C2H2 zinc finger	C2H2
Cc043996	RNA biosynthesis.transcription factor families.C2H2 zinc finger	C2H2
Cc023780	RNA biosynthesis.transcription factor families.C2H2 zinc finger	C2H2
Cc001668	RNA biosynthesis.transcription factor families.C2H2 zinc finger	C2H2
Cc025393	RNA biosynthesis.transcription factor families.C2H2 zinc finger	C2H2
Cc003024	RNA biosynthesis.transcription factor families.C2H2 zinc finger	C2H2
Cc005399	RNA biosynthesis.transcription factor families.C2H2 zinc finger	C2H2
Cc024073	RNA biosynthesis.transcription factor families.C2H2 zinc finger	C2H2
Cc009347	RNA biosynthesis.transcription factor families.C2H2 zinc finger	C2H2
Cc046154	RNA biosynthesis.transcription factor families.C2H2 zinc finger	C2H2
Cc036925	RNA biosynthesis.transcription factor families.C2H2 zinc finger	C2H2
Cc036606	RNA biosynthesis.transcription factor families.C2H2 zinc finger	C2H2
Cc009144	RNA biosynthesis.transcription factor families.C2H2 zinc finger	C2H2
Cc002626	RNA biosynthesis.transcription factor families.C2H2 zinc finger	C2H2
Cc005217	RNA biosynthesis.transcription factor families.C2H2 zinc finger	C2H2
Cc018274	RNA biosynthesis.transcription factor families.C2H2 zinc finger	C2H2
Cc023759	RNA biosynthesis.transcription factor families.C2H2 zinc finger	C2H2
Cc008798	RNA biosynthesis.transcription factor families.C2H2 zinc finger	C2H2
Cc022928	RNA biosynthesis.transcription factor families.C2H2 zinc finger	C2H2
Cc017740	RNA biosynthesis.transcription factor families.C2H2 zinc finger	C2H2
Cc011280	RNA biosynthesis.transcription factor families.C2H2 zinc finger	C2H2
Cc015938	RNA biosynthesis.transcription factor families.C2H2 zinc finger	C2H2
Cc016098	RNA biosynthesis.transcription factor families.C2H2 zinc finger	C2H2
Cc005504	RNA biosynthesis.transcription factor families.C2H2 zinc finger	C2H2
Cc008830	RNA biosynthesis.transcription factor families.C2H2 zinc finger	C2H2
Cc033536	RNA biosynthesis.transcription factor families.C2H2 zinc finger	C2H2
Cc017300	RNA biosynthesis.transcription factor families.C2H2 zinc finger	C2H2
Cc011230	RNA biosynthesis.transcription factor families.C2H2 zinc finger	C2H2
Cc015901	RNA biosynthesis.transcription factor families.C2H2 zinc finger	C2H2
Cc006025	RNA processing.RNA 3-end polyadenylation.Cleavage Factor II	C2H2
Cc002149	RNA processing.RNA 3-end polyadenylation.Cleavage Factor II	C2H2
Cc022329	RNA biosynthesis.transcription factor families.C2H2 zinc finger	C2H2
Cc012228	RNA biosynthesis.transcription factor families.C2H2 zinc finger	C2H2
Cc044079	RNA biosynthesis.transcription factor families.C2H2 zinc finger	C2H2
Cc004547	hypothetical protein	C2H2
Cc019662	hypothetical protein	C2H2
Cc004244	RNA biosynthesis.transcription factor families.C2H2 zinc finger	C2H2
Cc024359	RNA biosynthesis.transcription factor families.C2H2 zinc finger	C2H2
Cc031562	RNA biosynthesis.transcription factor families.C2H2 zinc finger	C2H2
Cc000726	Lipid metabolism.glycerolipid synthesis.phosphatidylglycerol.CDP-diacylglycerol	C2H2
Cc037692	Lipid metabolism.glycerolipid synthesis.phosphatidylglycerol.CDP-diacylglycerol	C2H2
Cc017018	RNA biosynthesis.transcription factor families.C2H2 zinc finger	C2H2
Cc019496	RNA biosynthesis.transcription factor families.C2H2 zinc finger	C2H2
Cc045076	RNA biosynthesis.transcription factor families.C2H2 zinc finger	C2H2
Cc023022	RNA biosynthesis.transcription factor families.C2H2 zinc finger	C2H2
Cc011491	Chromatin assembly and remodeling.histone modifications.histone	C2H2
Cc003852	RNA biosynthesis.transcription factor families.JUMONJI transcription	C2H2
Cc023258	RNA biosynthesis.transcription factor families.JUMONJI transcription	C2H2
Cc007811	RNA biosynthesis.transcription factor families.C2H2 zinc finger	C2H2
Cc031637	RNA biosynthesis.transcription factor families.C2H2 zinc finger	C2H2
Cc004836	RNA biosynthesis.transcription factor families.C2H2 zinc finger	C2H2
Cc006866	RNA biosynthesis.transcription factor families.C2H2 zinc finger	C2H2
Cc007983	RNA biosynthesis.RNA polymerase III-dependent transcription.TFIIIa	C2H2
Cc025827	RNA biosynthesis.RNA polymerase III-dependent transcription.TFIIIa	C2H2
Cc017674	RNA biosynthesis.transcription factor families.C2H2 zinc finger	C2H2
Cc044147	RNA biosynthesis.transcription factor families.C2H2 zinc finger	C2H2
Cc024654	RNA biosynthesis.transcription factor families.C2H2 zinc finger	C2H2
Cc003378	RNA biosynthesis.transcription factor families.C2H2 zinc finger	C2H2
Cc008098	RNA biosynthesis.transcription factor families.C2H2 zinc finger	C2H2
Cc044361	RNA biosynthesis.transcription factor families.C2H2 zinc finger	C2H2
Cc028229	RNA biosynthesis.transcription factor families.C2H2 zinc finger	C2H2
Cc026642	RNA biosynthesis.transcription factor families.C2H2 zinc finger	C2H2
Cc009592	RNA biosynthesis.transcription factor families.C2H2 zinc finger	C2H2
Cc010085	RNA biosynthesis.transcription factor families.C2H2 zinc finger	C2H2
Cc030331	hypothetical protein	C2H2
Cc033162	hypothetical protein	C2H2
Cc017545	RNA biosynthesis.transcription factor families.C2H2 zinc finger	C2H2
Cc028880	RNA biosynthesis.transcription factor families.C2H2 zinc finger	C2H2
Cc021943	RNA biosynthesis.transcription factor families.C2H2 zinc finger	C2H2
Cc028514	RNA biosynthesis.transcription factor families.C2H2 zinc finger	C2H2
Cc024578	RNA biosynthesis.transcription factor families.C2H2 zinc finger	C2H2
Cc025682	RNA biosynthesis.RNA polymerase III-dependent transcription.TFIIIc	C2H2
Cc030772	hypothetical protein	C2H2
Cc018922	hypothetical protein	C2H2
Cc008067	RNA biosynthesis.transcription factor families.C3H zinc finger	C3H
Cc039699	RNA biosynthesis.transcription factor families.C3H zinc finger	C3H
Cc014564	RNA biosynthesis.transcription factor families.C3H zinc finger	C3H
Cc032279	RNA biosynthesis.transcription factor families.C3H zinc finger	C3H
Cc016475	RNA biosynthesis.transcription factor families.C3H zinc finger	C3H
Cc000891	RNA biosynthesis.transcription factor families.C3H zinc finger	C3H
Cc046923	RNA biosynthesis.transcription factor families.C3H zinc finger	C3H
Cc001314	RNA biosynthesis.transcription factor families.C3H zinc finger	C3H
Cc045713	RNA biosynthesis.transcription factor families.C3H zinc finger	C3H
Cc008813	RNA biosynthesis.transcription factor families.C3H zinc finger	C3H
Cc004368	RNA biosynthesis.transcription factor families.C3H zinc finger	C3H
Cc029267	RNA biosynthesis.transcription factor families.C3H zinc finger	C3H
Cc020836	RNA biosynthesis.transcription factor families.C3H zinc finger	C3H
Cc037644	RNA biosynthesis.transcription factor families.C3H zinc finger	C3H
Cc004012	RNA biosynthesis.transcription factor families.C3H zinc finger	C3H
Cc021531	RNA biosynthesis.transcription factor families.MYB superfamily.MYB	C3H
Cc014766	hypothetical protein	C3H
Cc014765	hypothetical protein	C3H
Cc047271	RNA biosynthesis.transcription factor families.C3H zinc finger	C3H
Cc030040	RNA biosynthesis.transcription factor families.C3H zinc finger	C3H
Cc040429	RNA biosynthesis.transcription factor families.C3H zinc finger	C3H
Cc016067	RNA biosynthesis.transcription factor families.C3H zinc finger	C3H
Cc011490	RNA biosynthesis.transcription factor families.C3H zinc finger	C3H
Cc008729	RNA biosynthesis.transcription factor families.C3H zinc finger	C3H
Cc042099	RNA biosynthesis.transcription factor families.C3H zinc finger	C3H
Cc015579	RNA biosynthesis.transcription factor families.C3H zinc finger	C3H
Cc023130	RNA biosynthesis.transcription factor families.C3H zinc finger	C3H
Cc030009	RNA biosynthesis.transcription factor families.C3H zinc finger	C3H
Cc018231	RNA biosynthesis.transcription factor families.C3H zinc finger	C3H
Cc018989	RNA biosynthesis.transcription factor families.C3H zinc finger	C3H
Cc033188	RNA biosynthesis.transcription factor families.C3H zinc finger	C3H
Cc044819	RNA biosynthesis.transcription factor families.C3H zinc finger	C3H
Cc000493	RNA biosynthesis.transcription factor families.C3H zinc finger	C3H
Cc047177	RNA biosynthesis.transcription factor families.C3H zinc finger	C3H
Cc036276	RNA processing.RNA modification.dihydrouridylation.tRNA dihydrouridine	C3H
Cc030106	RNA processing.RNA modification.dihydrouridylation.tRNA dihydrouridine	C3H
Cc023423	RNA biosynthesis.transcription factor families.C3H zinc finger	C3H
Cc017214	RNA biosynthesis.transcription factor families.C3H zinc finger	C3H
Cc033400	RNA biosynthesis.transcription factor families.C3H zinc finger	C3H
Cc031041	RNA biosynthesis.transcription factor families.C3H zinc finger	C3H
Cc014663	hypothetical protein	C3H
Cc023551	hypothetical protein	C3H
Cc005762	RNA biosynthesis.transcription factor families.C3H zinc finger	C3H
Cc017494	RNA biosynthesis.transcription factor families.C3H zinc finger	C3H
Cc016487	hypothetical protein	C3H
Cc000880	hypothetical protein	C3H
Cc014571	hypothetical protein	C3H
Cc032285	hypothetical protein	C3H
Cc035410	RNA biosynthesis.transcription factor families.C3H zinc finger	C3H
Cc005164	RNA biosynthesis.transcription factor families.C3H zinc finger	C3H
Cc039358	RNA biosynthesis.transcription factor families.C3H zinc finger	C3H
Cc039347	RNA biosynthesis.transcription factor families.C3H zinc finger	C3H
Cc047541	hypothetical protein	C3H
Cc034481	hypothetical protein	C3H
Cc011347	RNA biosynthesis.transcription factor families.C3H zinc finger	C3H
Cc014733	Protein translocation.nucleus.nucleocytoplasmic transport.nuclear	C3H
Cc002254	RNA biosynthesis.transcription factor families.C3H zinc finger	C3H
Cc019548	hypothetical protein	C3H
Cc004993	hypothetical protein	C3H
Cc022239	hypothetical protein	C3H
Cc035836	RNA biosynthesis.transcription factor families.C3H zinc finger	C3H
Cc036607	RNA biosynthesis.transcription factor families.C3H zinc finger	C3H
Cc040062	RNA biosynthesis.transcription factor families.C3H zinc finger	C3H
Cc040061	RNA biosynthesis.transcription factor families.C3H zinc finger	C3H
Cc031746	RNA biosynthesis.transcription factor families.CAMTA transcription	CAMTA
Cc031349	RNA biosynthesis.transcription factor families.CAMTA transcription	CAMTA
Cc009349	RNA biosynthesis.transcription factor families.CAMTA transcription	CAMTA
Cc006470	RNA biosynthesis.transcription factor families.CAMTA transcription	CAMTA
Cc001622	RNA biosynthesis.transcription factor families.CAMTA transcription	CAMTA
Cc046156	RNA biosynthesis.transcription factor families.CAMTA transcription	CAMTA
Cc035668	RNA biosynthesis.transcription factor families.CAMTA transcription	CAMTA
Cc005811	RNA biosynthesis.transcription factor families.CAMTA transcription	CAMTA
Cc019974	RNA biosynthesis.transcription factor families.CAMTA transcription	CAMTA
Cc044509	RNA biosynthesis.transcription factor families.CAMTA transcription	CAMTA
Cc030508	RNA biosynthesis.transcription factor families.C2C2 superfamily.BBX/CONSTANS	CO-like
Cc046193	RNA biosynthesis.transcription factor families.C2C2 superfamily.BBX/CONSTANS	CO-like
Cc025812	RNA biosynthesis.transcription factor families.C2C2 superfamily.BBX/CONSTANS	CO-like
Cc017249	RNA biosynthesis.transcription factor families.C2C2 superfamily.BBX/CONSTANS	CO-like
Cc006914	RNA biosynthesis.transcription factor families.C2C2 superfamily.BBX/CONSTANS	CO-like
Cc007766	RNA biosynthesis.transcription factor families.C2C2 superfamily.BBX/CONSTANS	CO-like
Cc038716	RNA biosynthesis.transcription factor families.C2C2 superfamily.BBX/CONSTANS	CO-like
Cc044477	RNA biosynthesis.transcription factor families.C2C2 superfamily.BBX/CONSTANS	CO-like
Cc019940	RNA biosynthesis.transcription factor families.C2C2 superfamily.BBX/CONSTANS	CO-like
Cc032743	RNA biosynthesis.transcription factor families.C2C2 superfamily.BBX/CONSTANS	CO-like
Cc025634	RNA biosynthesis.transcription factor families.C2C2 superfamily.BBX/CONSTANS	CO-like
Cc017248	hypothetical protein	CO-like
Cc001594	RNA biosynthesis.transcription factor families.C2C2 superfamily.BBX/CONSTANS	CO-like
Cc027047	RNA biosynthesis.transcription factor families.CPP1-like transcription	CPP
Cc034678	RNA biosynthesis.transcription factor families.CPP1-like transcription	CPP
Cc004780	RNA biosynthesis.transcription factor families.CPP1-like transcription	CPP
Cc044762	RNA biosynthesis.transcription factor families.CPP1-like transcription	CPP
Cc032000	RNA biosynthesis.transcription factor families.CPP1-like transcription	CPP
Cc024958	RNA biosynthesis.transcription factor families.CPP1-like transcription	CPP
Cc024941	RNA biosynthesis.transcription factor families.CPP1-like transcription	CPP
Cc031960	RNA biosynthesis.transcription factor families.CPP1-like transcription	CPP
Cc045690	RNA biosynthesis.transcription factor families.CPP1-like transcription	CPP
Cc001974	RNA biosynthesis.transcription factor families.C2C2 superfamily.BBX/DBB	DBB
Cc022819	RNA biosynthesis.transcription factor families.C2C2 superfamily.BBX/DBB	DBB
Cc009987	RNA biosynthesis.transcription factor families.C2C2 superfamily.BBX/DBB	DBB
Cc030098	RNA biosynthesis.transcription factor families.C2C2 superfamily.BBX/DBB	DBB
Cc022668	RNA biosynthesis.transcription factor families.C2C2 superfamily.BBX/DBB	DBB
Cc014140	RNA biosynthesis.transcription factor families.C2C2 superfamily.BBX/DBB	DBB
Cc035101	RNA biosynthesis.transcription factor families.C2C2 superfamily.BBX/DBB	DBB
Cc045551	RNA biosynthesis.transcription factor families.C2C2 superfamily.DOF	Dof
Cc001838	RNA biosynthesis.transcription factor families.C2C2 superfamily.DOF	Dof
Cc006090	RNA biosynthesis.transcription factor families.C2C2 superfamily.DOF	Dof
Cc011554	RNA biosynthesis.transcription factor families.C2C2 superfamily.DOF	Dof
Cc014784	RNA biosynthesis.transcription factor families.C2C2 superfamily.DOF	Dof
Cc013224	RNA biosynthesis.transcription factor families.C2C2 superfamily.DOF	Dof
Cc017385	RNA biosynthesis.transcription factor families.C2C2 superfamily.DOF	Dof
Cc047325	RNA biosynthesis.transcription factor families.C2C2 superfamily.DOF	Dof
Cc005529	RNA biosynthesis.transcription factor families.C2C2 superfamily.DOF	Dof
Cc013822	RNA biosynthesis.transcription factor families.C2C2 superfamily.DOF	Dof
Cc008139	RNA biosynthesis.transcription factor families.C2C2 superfamily.DOF	Dof
Cc034270	RNA biosynthesis.transcription factor families.C2C2 superfamily.DOF	Dof
Cc040048	RNA biosynthesis.transcription factor families.C2C2 superfamily.DOF	Dof
Cc039845	RNA biosynthesis.transcription factor families.C2C2 superfamily.DOF	Dof
Cc037986	RNA biosynthesis.transcription factor families.C2C2 superfamily.DOF	Dof
Cc031540	RNA biosynthesis.transcription factor families.C2C2 superfamily.DOF	Dof
Cc016866	RNA biosynthesis.transcription factor families.C2C2 superfamily.DOF	Dof
Cc006337	RNA biosynthesis.transcription factor families.C2C2 superfamily.DOF	Dof
Cc012532	RNA biosynthesis.transcription factor families.C2C2 superfamily.DOF	Dof
Cc002793	RNA biosynthesis.transcription factor families.C2C2 superfamily.DOF	Dof
Cc005015	RNA biosynthesis.transcription factor families.C2C2 superfamily.DOF	Dof
Cc022262	RNA biosynthesis.transcription factor families.C2C2 superfamily.DOF	Dof
Cc030452	RNA biosynthesis.transcription factor families.C2C2 superfamily.DOF	Dof
Cc001117	RNA biosynthesis.transcription factor families.C2C2 superfamily.DOF	Dof
Cc023733	RNA biosynthesis.transcription factor families.C2C2 superfamily.DOF	Dof
Cc014083	RNA biosynthesis.transcription factor families.C2C2 superfamily.DOF	Dof
Cc002764	RNA biosynthesis.transcription factor families.C2C2 superfamily.DOF	Dof
Cc006304	RNA biosynthesis.transcription factor families.C2C2 superfamily.DOF	Dof
Cc009875	RNA biosynthesis.transcription factor families.C2C2 superfamily.DOF	Dof
Cc008387	RNA biosynthesis.transcription factor families.C2C2 superfamily.DOF	Dof
Cc039373	Cell cycle.interphase.G1 phase.DP transcription factor	E2F-DP
Cc039360	Cell cycle.interphase.G1 phase.DP transcription factor	E2F-DP
Cc028673	Cell cycle.interphase.G1 phase.DP transcription factor	E2F-DP
Cc008014	Cell cycle.interphase.G1 phase.DP transcription factor	E2F-DP
Cc025870	Cell cycle.interphase.G1 phase.DP transcription factor	E2F-DP
Cc005449	Cell cycle.interphase.G1 phase.DEL transcription factor	E2F-DP
Cc031613	Cell cycle.interphase.G1 phase.DEL transcription factor	E2F-DP
Cc029182	Cell cycle.interphase.G1 phase.E2F transcription factor	E2F-DP
Cc002078	Cell cycle.interphase.G1 phase.E2F transcription factor	E2F-DP
Cc017004	Phytohormones.ethylene.perception and signal transduction.EIN3-type	EIL
Cc019485	Phytohormones.ethylene.perception and signal transduction.EIN3-type	EIL
Cc005037	Phytohormones.ethylene.perception and signal transduction.EIN3-type	EIL
Cc022287	Phytohormones.ethylene.perception and signal transduction.EIN3-type	EIL
Cc028355	Phytohormones.ethylene.perception and signal transduction.EIN3-type	EIL
Cc026796	Phytohormones.ethylene.perception and signal transduction.EIN3-type	EIL
Cc022556	Phytohormones.ethylene.perception and signal transduction.EIN3-type	EIL
Cc017081	Phytohormones.ethylene.perception and signal transduction.EIN3-type	EIL
Cc020976	Phytohormones.ethylene.perception and signal transduction.EIN3-type	EIL
Cc016776	Phytohormones.ethylene.perception and signal transduction.EIN3-type	EIL
Cc046173	Phytohormones.ethylene.perception and signal transduction.EIN3-type	EIL
Cc014498	RNA biosynthesis.transcription factor families.AP2/ERF superfamily.ERF-type	ERF
Cc002541	RNA biosynthesis.transcription factor families.AP2/ERF superfamily.ERF-type	ERF
Cc044436	RNA biosynthesis.transcription factor families.AP2/ERF superfamily.ERF-type	ERF
Cc019908	RNA biosynthesis.transcription factor families.AP2/ERF superfamily.ERF-type	ERF
Cc027208	RNA biosynthesis.transcription factor families.AP2/ERF superfamily.ERF-type	ERF
Cc003190	hypothetical protein	ERF
Cc027763	RNA biosynthesis.transcription factor families.AP2/ERF superfamily.ERF-type	ERF
Cc046871	RNA biosynthesis.transcription factor families.AP2/ERF superfamily.ERF-type	ERF
Cc014497	RNA biosynthesis.transcription factor families.AP2/ERF superfamily.ERF-type	ERF
Cc001374	RNA biosynthesis.transcription factor families.AP2/ERF superfamily.ERF-type	ERF
Cc002540	RNA biosynthesis.transcription factor families.AP2/ERF superfamily.ERF-type	ERF
Cc025238	RNA biosynthesis.transcription factor families.AP2/ERF superfamily.ERF-type	ERF
Cc002602	RNA biosynthesis.transcription factor families.AP2/ERF superfamily.DREB-type	ERF
Cc014554	RNA biosynthesis.transcription factor families.AP2/ERF superfamily.DREB-type	ERF
Cc023560	RNA biosynthesis.transcription factor families.AP2/ERF superfamily.ERF-type	ERF
Cc014654	RNA biosynthesis.transcription factor families.AP2/ERF superfamily.ERF-type	ERF
Cc041413	RNA biosynthesis.transcription factor families.AP2/ERF superfamily.ERF-type	ERF
Cc006698	RNA biosynthesis.transcription factor families.AP2/ERF superfamily.ERF-type	ERF
Cc025368	RNA biosynthesis.transcription factor families.AP2/ERF superfamily.ERF-type	ERF
Cc032641	RNA biosynthesis.transcription factor families.AP2/ERF superfamily.ERF-type	ERF
Cc006988	RNA biosynthesis.transcription factor families.AP2/ERF superfamily.ERF-type	ERF
Cc046907	RNA biosynthesis.transcription factor families.AP2/ERF superfamily.DREB-type	ERF
Cc023819	RNA biosynthesis.transcription factor families.AP2/ERF superfamily.ERF-type	ERF
Cc001703	RNA biosynthesis.transcription factor families.AP2/ERF superfamily.ERF-type	ERF
Cc044285	RNA biosynthesis.transcription factor families.AP2/ERF superfamily.DREB-type	ERF
Cc004845	RNA biosynthesis.transcription factor families.AP2/ERF superfamily.ERF-type	ERF
Cc037250	RNA biosynthesis.transcription factor families.AP2/ERF superfamily.DREB-type	ERF
Cc037238	RNA biosynthesis.transcription factor families.AP2/ERF superfamily.DREB-type	ERF
Cc036620	RNA biosynthesis.transcription factor families.AP2/ERF superfamily.DREB-type	ERF
Cc014873	RNA biosynthesis.transcription factor families.AP2/ERF superfamily.DREB-type	ERF
Cc033129	RNA biosynthesis.transcription factor families.AP2/ERF superfamily.DREB-type	ERF
Cc045582	RNA biosynthesis.transcription factor families.AP2/ERF superfamily.DREB-type	ERF
Cc020813	RNA biosynthesis.transcription factor families.AP2/ERF superfamily.DREB-type	ERF
Cc003428	RNA biosynthesis.transcription factor families.AP2/ERF superfamily.DREB-type	ERF
Cc029300	RNA biosynthesis.transcription factor families.AP2/ERF superfamily.DREB-type	ERF
Cc004340	hypothetical protein	ERF
Cc000755	RNA biosynthesis.transcription factor families.AP2/ERF superfamily.DREB-type	ERF
Cc027554	RNA biosynthesis.transcription factor families.AP2/ERF superfamily.DREB-type	ERF
Cc016328	RNA biosynthesis.transcription factor families.AP2/ERF superfamily.DREB-type	ERF
Cc044848	RNA biosynthesis.transcription factor families.AP2/ERF superfamily.DREB-type	ERF
Cc044839	RNA biosynthesis.transcription factor families.AP2/ERF superfamily.DREB-type	ERF
Cc045700	RNA biosynthesis.transcription factor families.AP2/ERF superfamily.DREB-type	ERF
Cc037657	RNA biosynthesis.transcription factor families.AP2/ERF superfamily.DREB-type	ERF
Cc012621	RNA biosynthesis.transcription factor families.AP2/ERF superfamily.DREB-type	ERF
Cc002037	RNA biosynthesis.transcription factor families.AP2/ERF superfamily.DREB-type	ERF
Cc008898	RNA biosynthesis.transcription factor families.AP2/ERF superfamily.DREB-type	ERF
Cc007297	RNA biosynthesis.transcription factor families.AP2/ERF superfamily.ERF-type	ERF
Cc019888	hypothetical protein	ERF
Cc024260	RNA biosynthesis.transcription factor families.AP2/ERF superfamily.ERF-type	ERF
Cc018735	RNA biosynthesis.transcription factor families.AP2/ERF superfamily.ERF-type	ERF
Cc001332	RNA biosynthesis.transcription factor families.AP2/ERF superfamily.DREB-type	ERF
Cc032653	RNA biosynthesis.transcription factor families.AP2/ERF superfamily.DREB-type	ERF
Cc017702	RNA biosynthesis.transcription factor families.AP2/ERF superfamily.DREB-type	ERF
Cc044118	RNA biosynthesis.transcription factor families.AP2/ERF superfamily.DREB-type	ERF
Cc001597	RNA biosynthesis.transcription factor families.AP2/ERF superfamily.ERF-type	ERF
Cc011337	RNA biosynthesis.transcription factor families.AP2/ERF superfamily.DREB-type	ERF
Cc047189	RNA biosynthesis.transcription factor families.AP2/ERF superfamily.DREB-type	ERF
Cc032585	RNA biosynthesis.transcription factor families.AP2/ERF superfamily.ERF-type	ERF
Cc045056	RNA biosynthesis.transcription factor families.AP2/ERF superfamily.ERF-type	ERF
Cc044664	RNA biosynthesis.transcription factor families.AP2/ERF superfamily.DREB-type	ERF
Cc045605	RNA biosynthesis.transcription factor families.AP2/ERF superfamily.ERF-type	ERF
Cc025038	RNA biosynthesis.transcription factor families.AP2/ERF superfamily.ERF-type	ERF
Cc004432	RNA biosynthesis.transcription factor families.AP2/ERF superfamily.ERF-type	ERF
Cc031070	RNA biosynthesis.transcription factor families.AP2/ERF superfamily.ERF-type	ERF
Cc019788	RNA biosynthesis.transcription factor families.AP2/ERF superfamily.ERF-type	ERF
Cc044420	hypothetical protein	ERF
Cc018693	hypothetical protein	ERF
Cc006697	RNA biosynthesis.transcription factor families.AP2/ERF superfamily.ERF-type	ERF
Cc006989	RNA biosynthesis.transcription factor families.AP2/ERF superfamily.ERF-type	ERF
Cc034844	RNA biosynthesis.transcription factor families.AP2/ERF superfamily.ERF-type	ERF
Cc019039	RNA biosynthesis.transcription factor families.AP2/ERF superfamily.ERF-type	ERF
Cc000447	RNA biosynthesis.transcription factor families.AP2/ERF superfamily.ERF-type	ERF
Cc023691	RNA biosynthesis.transcription factor families.AP2/ERF superfamily.DREB-type	ERF
Cc014038	RNA biosynthesis.transcription factor families.AP2/ERF superfamily.DREB-type	ERF
Cc044018	RNA biosynthesis.transcription factor families.AP2/ERF superfamily.DREB-type	ERF
Cc005691	RNA biosynthesis.transcription factor families.AP2/ERF superfamily.DREB-type	ERF
Cc037321	RNA biosynthesis.transcription factor families.AP2/ERF superfamily.DREB-type	ERF
Cc005385	hypothetical protein	ERF
Cc044396	RNA biosynthesis.transcription factor families.AP2/ERF superfamily.DREB-type	ERF
Cc021922	RNA biosynthesis.transcription factor families.AP2/ERF superfamily.DREB-type	ERF
Cc020138	RNA biosynthesis.transcription factor families.AP2/ERF superfamily.DREB-type	ERF
Cc024049	hypothetical protein	ERF
Cc015156	RNA biosynthesis.transcription factor families.AP2/ERF superfamily.ERF-type	ERF
Cc047357	RNA biosynthesis.transcription factor families.AP2/ERF superfamily.DREB-type	ERF
Cc004013	RNA biosynthesis.transcription factor families.AP2/ERF superfamily.ERF-type	ERF
Cc020837	RNA biosynthesis.transcription factor families.AP2/ERF superfamily.ERF-type	ERF
Cc005317	RNA biosynthesis.transcription factor families.AP2/ERF superfamily.APD1	ERF
Cc020723	RNA biosynthesis.transcription factor families.AP2/ERF superfamily.ERF-type	ERF
Cc025053	RNA biosynthesis.transcription factor families.AP2/ERF superfamily.DREB-type	ERF
Cc004954	RNA biosynthesis.transcription factor families.AP2/ERF superfamily.ERF-type	ERF
Cc031648	RNA biosynthesis.transcription factor families.AP2/ERF superfamily.ERF-type	ERF
Cc026112	RNA biosynthesis.transcription factor families.AP2/ERF superfamily.DREB-type	ERF
Cc021751	RNA biosynthesis.transcription factor families.AP2/ERF superfamily.DREB-type	ERF
Cc014964	RNA biosynthesis.transcription factor families.AP2/ERF superfamily.ERF-type	ERF
Cc028485	RNA biosynthesis.transcription factor families.AP2/ERF superfamily.DREB-type	ERF
Cc038789	RNA biosynthesis.transcription factor families.AP2/ERF superfamily.DREB-type	ERF
Cc038786	RNA biosynthesis.transcription factor families.AP2/ERF superfamily.DREB-type	ERF
Cc018346	RNA biosynthesis.transcription factor families.AP2/ERF superfamily.DREB-type	ERF
Cc031203	RNA biosynthesis.transcription factor families.FAR1 transcription	FAR1
Cc027657	RNA biosynthesis.transcription factor families.FAR1 transcription	FAR1
Cc027815	RNA biosynthesis.transcription factor families.FAR1 transcription	FAR1
Cc044240	RNA biosynthesis.transcription factor families.FAR1 transcription	FAR1
Cc023375	RNA biosynthesis.transcription factor families.FAR1 transcription	FAR1
Cc047362	RNA biosynthesis.transcription factor families.FAR1 transcription	FAR1
Cc007526	RNA biosynthesis.transcription factor families.FAR1 transcription	FAR1
Cc010115	RNA biosynthesis.transcription factor families.FAR1 transcription	FAR1
Cc026200	RNA biosynthesis.transcription factor families.FAR1 transcription	FAR1
Cc024906	RNA biosynthesis.transcription factor families.FAR1 transcription	FAR1
Cc013711	RNA biosynthesis.transcription factor families.FAR1 transcription	FAR1
Cc032154	Chromatin assembly and remodeling.histone modifications.histone	FAR1
Cc041527	RNA biosynthesis.transcription factor families.FAR1 transcription	FAR1
Cc011970	RNA biosynthesis.transcription factor families.FAR1 transcription	FAR1
Cc044704	RNA biosynthesis.transcription factor families.FAR1 transcription	FAR1
Cc004725	RNA biosynthesis.transcription factor families.FAR1 transcription	FAR1
Cc009984	RNA biosynthesis.transcription factor families.FAR1 transcription	FAR1
Cc008500	RNA biosynthesis.transcription factor families.FAR1 transcription	FAR1
Cc005269	Amino acid metabolism.biosynthesis.glutamate family.glutamate-derived	G2-like
Cc020140	RNA biosynthesis.transcription factor families.MYB superfamily.G2-like	G2-like
Cc024859	hypothetical protein	G2-like
Cc028656	hypothetical protein	G2-like
Cc025848	hypothetical protein	G2-like
Cc021595	RNA biosynthesis.transcription factor families.MYB superfamily.G2-like	G2-like
Cc013108	RNA biosynthesis.transcription factor families.MYB superfamily.G2-like	G2-like
Cc006136	RNA biosynthesis.transcription factor families.MYB superfamily.G2-like	G2-like
Cc034331	RNA biosynthesis.transcription factor families.MYB superfamily.G2-like	G2-like
Cc009284	RNA biosynthesis.transcription factor families.MYB superfamily.G2-like	G2-like
Cc016678	RNA biosynthesis.transcription factor families.MYB superfamily.G2-like	G2-like
Cc012834	RNA biosynthesis.transcription factor families.MYB superfamily.G2-like	G2-like
Cc029242	RNA biosynthesis.transcription factor families.MYB superfamily.G2-like	G2-like
Cc007588	RNA biosynthesis.transcription factor families.MYB superfamily.G2-like	G2-like
Cc010176	RNA biosynthesis.transcription factor families.MYB superfamily.G2-like	G2-like
Cc008118	Multi-process regulatory mechanisms.circadian clock.evening	G2-like
Cc013250	Multi-process regulatory mechanisms.circadian clock.evening	G2-like
Cc027746	RNA biosynthesis.transcription factor families.C2C2 superfamily.GATA	GATA
Cc004970	RNA biosynthesis.transcription factor families.C2C2 superfamily.GATA	GATA
Cc022221	RNA biosynthesis.transcription factor families.C2C2 superfamily.GATA	GATA
Cc023877	RNA biosynthesis.transcription factor families.C2C2 superfamily.GATA	GATA
Cc001763	RNA biosynthesis.transcription factor families.C2C2 superfamily.GATA	GATA
Cc008222	RNA biosynthesis.transcription factor families.C2C2 superfamily.GATA	GATA
Cc009190	RNA biosynthesis.transcription factor families.C2C2 superfamily.GATA	GATA
Cc004347	RNA biosynthesis.transcription factor families.C2C2 superfamily.GATA	GATA
Cc016585	RNA biosynthesis.transcription factor families.C2C2 superfamily.GATA	GATA
Cc003075	RNA biosynthesis.transcription factor families.C2C2 superfamily.GATA	GATA
Cc013896	RNA biosynthesis.transcription factor families.C2C2 superfamily.GATA	GATA
Cc008225	RNA biosynthesis.transcription factor families.C2C2 superfamily.GATA	GATA
Cc035422	RNA biosynthesis.transcription factor families.C2C2 superfamily.GATA	GATA
Cc021784	RNA biosynthesis.transcription factor families.C2C2 superfamily.GATA	GATA
Cc029290	RNA biosynthesis.transcription factor families.C2C2 superfamily.GATA	GATA
Cc012270	RNA biosynthesis.transcription factor families.C2C2 superfamily.GATA	GATA
Cc027104	RNA biosynthesis.transcription factor families.C2C2 superfamily.GATA	GATA
Cc017520	RNA biosynthesis.transcription factor families.C2C2 superfamily.GATA	GATA
Cc002638	RNA biosynthesis.transcription factor families.C2C2 superfamily.GATA	GATA
Cc015478	RNA biosynthesis.transcription factor families.C2C2 superfamily.GATA	GATA
Cc023253	RNA biosynthesis.transcription factor families.C2C2 superfamily.GATA	GATA
Cc003847	RNA biosynthesis.transcription factor families.C2C2 superfamily.GATA	GATA
Cc034059	RNA biosynthesis.transcription factor families.C2C2 superfamily.GATA	GATA
Cc044605	RNA biosynthesis.transcription factor families.C2C2 superfamily.GATA	GATA
Cc020078	RNA biosynthesis.transcription factor families.C2C2 superfamily.GATA	GATA
Cc003000	RNA biosynthesis.transcription factor families.C2C2 superfamily.GATA	GATA
Cc025426	RNA biosynthesis.transcription factor families.C2C2 superfamily.GATA	GATA
Cc028274	RNA biosynthesis.transcription factor families.C2C2 superfamily.GATA	GATA
Cc020517	RNA biosynthesis.transcription factor families.GeBP transcription	GeBP
Cc028108	RNA biosynthesis.transcription factor families.GeBP transcription	GeBP
Cc026566	RNA biosynthesis.transcription factor families.GeBP transcription	GeBP
Cc020277	RNA biosynthesis.transcription factor families.GeBP transcription	GeBP
Cc034629	RNA biosynthesis.transcription factor families.GRAS transcription	GRAS
Cc047394	RNA biosynthesis.transcription factor families.GRAS transcription	GRAS
Cc014346	RNA biosynthesis.transcription factor families.GRAS transcription	GRAS
Cc002394	RNA biosynthesis.transcription factor families.GRAS transcription	GRAS
Cc001453	RNA biosynthesis.transcription factor families.GRAS transcription	GRAS
Cc013797	RNA biosynthesis.transcription factor families.GRAS transcription	GRAS
Cc017415	RNA biosynthesis.transcription factor families.GRAS transcription	GRAS
Cc013799	RNA biosynthesis.transcription factor families.GRAS transcription	GRAS
Cc017413	RNA biosynthesis.transcription factor families.GRAS transcription	GRAS
Cc013242	RNA biosynthesis.transcription factor families.GRAS transcription	GRAS
Cc013241	RNA biosynthesis.transcription factor families.GRAS transcription	GRAS
Cc008127	RNA biosynthesis.transcription factor families.GRAS transcription	GRAS
Cc019714	RNA biosynthesis.transcription factor families.GRAS transcription	GRAS
Cc004497	RNA biosynthesis.transcription factor families.GRAS transcription	GRAS
Cc046794	RNA biosynthesis.transcription factor families.GRAS transcription	GRAS
Cc006099	Phytohormones.gibberellin.perception and signal transduction.DELLA-type	GRAS
Cc034285	Phytohormones.gibberellin.perception and signal transduction.DELLA-type	GRAS
Cc002393	RNA biosynthesis.transcription factor families.GRAS transcription	GRAS
Cc026871	RNA biosynthesis.transcription factor families.GRAS transcription	GRAS
Cc010594	RNA biosynthesis.transcription factor families.GRAS transcription	GRAS
Cc010427	RNA biosynthesis.transcription factor families.GRF-GIF transcriptional	GRF
Cc047294	RNA biosynthesis.transcription factor families.GRF-GIF transcriptional	GRF
Cc027796	RNA biosynthesis.transcription factor families.GRF-GIF transcriptional	GRF
Cc044215	RNA biosynthesis.transcription factor families.GRF-GIF transcriptional	GRF
Cc013992	RNA biosynthesis.transcription factor families.GRF-GIF transcriptional	GRF
Cc030957	RNA biosynthesis.transcription factor families.GRF-GIF transcriptional	GRF
Cc046710	RNA biosynthesis.transcription factor families.GRF-GIF transcriptional	GRF
Cc022128	RNA biosynthesis.transcription factor families.GRF-GIF transcriptional	GRF
Cc047411	RNA biosynthesis.transcription factor families.GRF-GIF transcriptional	GRF
Cc034611	RNA biosynthesis.transcription factor families.GRF-GIF transcriptional	GRF
Cc044906	RNA biosynthesis.transcription factor families.GRF-GIF transcriptional	GRF
Cc016272	RNA biosynthesis.transcription factor families.GRF-GIF transcriptional	GRF
Cc013689	RNA biosynthesis.RNA polymerase IV-dependent siRNA biogenesis.SHH	HB-other
Cc036054	RNA biosynthesis.RNA polymerase IV-dependent siRNA biogenesis.SHH	HB-other
Cc037893	RNA biosynthesis.transcription factor families.HB (Homeobox)	HB-other
Cc022492	RNA biosynthesis.transcription factor families.HB (Homeobox)	HB-other
Cc041405	RNA biosynthesis.transcription factor families.HB (Homeobox)	HB-other
Cc037803	RNA biosynthesis.transcription factor families.HB (Homeobox)	HB-other
Cc021471	RNA biosynthesis.transcription factor families.HB (Homeobox)	HB-other
Cc020370	RNA biosynthesis.transcription factor families.HB (Homeobox)	HB-other
Cc009134	RNA biosynthesis.transcription factor families.HB (Homeobox)	HB-other
Cc005829	RNA biosynthesis.transcription factor families.HB (Homeobox)	HB-other
Cc020366	RNA biosynthesis.transcription factor families.HB (Homeobox)	HB-other
Cc016720	RNA biosynthesis.transcription factor families.HB (Homeobox)	HB-other
Cc020368	RNA biosynthesis.transcription factor families.HB (Homeobox)	HB-other
Cc016721	RNA biosynthesis.transcription factor families.HB (Homeobox)	HB-other
Cc025386	RNA biosynthesis.transcription factor families.HB (Homeobox)	HB-PHD
Cc003028	RNA biosynthesis.transcription factor families.HB (Homeobox)	HB-PHD
Cc001678	RNA biosynthesis.transcription factor families.HB (Homeobox)	HB-PHD
Cc023793	RNA biosynthesis.transcription factor families.HB (Homeobox)	HB-PHD
Cc036461	RNA biosynthesis.transcription factor families.HB (Homeobox)	HD-ZIP
Cc000690	RNA biosynthesis.transcription factor families.HB (Homeobox)	HD-ZIP
Cc006395	RNA biosynthesis.transcription factor families.HB (Homeobox)	HD-ZIP
Cc002853	RNA biosynthesis.transcription factor families.HB (Homeobox)	HD-ZIP
Cc041501	RNA biosynthesis.transcription factor families.HB (Homeobox)	HD-ZIP
Cc011937	RNA biosynthesis.transcription factor families.HB (Homeobox)	HD-ZIP
Cc001427	RNA biosynthesis.transcription factor families.HB (Homeobox)	HD-ZIP
Cc046820	RNA biosynthesis.transcription factor families.HB (Homeobox)	HD-ZIP
Cc012441	RNA biosynthesis.transcription factor families.HB (Homeobox)	HD-ZIP
Cc003411	RNA biosynthesis.transcription factor families.HB (Homeobox)	HD-ZIP
Cc012964	RNA biosynthesis.transcription factor families.HB (Homeobox)	HD-ZIP
Cc003611	RNA biosynthesis.transcription factor families.HB (Homeobox)	HD-ZIP
Cc027108	RNA biosynthesis.transcription factor families.HB (Homeobox)	HD-ZIP
Cc003079	RNA biosynthesis.transcription factor families.HB (Homeobox)	HD-ZIP
Cc008901	RNA biosynthesis.transcription factor families.HB (Homeobox)	HD-ZIP
Cc003431	RNA biosynthesis.transcription factor families.HB (Homeobox)	HD-ZIP
Cc017517	RNA biosynthesis.transcription factor families.HB (Homeobox)	HD-ZIP
Cc002635	RNA biosynthesis.transcription factor families.HB (Homeobox)	HD-ZIP
Cc044899	RNA biosynthesis.transcription factor families.HB (Homeobox)	HD-ZIP
Cc016280	RNA biosynthesis.transcription factor families.HB (Homeobox)	HD-ZIP
Cc030894	RNA biosynthesis.transcription factor families.HB (Homeobox)	HD-ZIP
Cc006046	RNA biosynthesis.transcription factor families.HB (Homeobox)	HD-ZIP
Cc012886	RNA biosynthesis.transcription factor families.HB (Homeobox)	HD-ZIP
Cc003543	RNA biosynthesis.transcription factor families.HB (Homeobox)	HD-ZIP
Cc047423	RNA biosynthesis.transcription factor families.HB (Homeobox)	HD-ZIP
Cc034601	RNA biosynthesis.transcription factor families.HB (Homeobox)	HD-ZIP
Cc045171	RNA biosynthesis.transcription factor families.HB (Homeobox)	HD-ZIP
Cc022930	RNA biosynthesis.transcription factor families.HB (Homeobox)	HD-ZIP
Cc020260	RNA biosynthesis.transcription factor families.HB (Homeobox)	HD-ZIP
Cc026585	RNA biosynthesis.transcription factor families.HB (Homeobox)	HD-ZIP
Cc045722	RNA biosynthesis.transcription factor families.HRT transcription	HRT-like
Cc037636	RNA biosynthesis.transcription factor families.HRT transcription	HRT-like
Cc001429	RNA biosynthesis.transcription factor families.HSF (heat shock)	HSF
Cc046818	RNA biosynthesis.transcription factor families.HSF (heat shock)	HSF
Cc022664	RNA biosynthesis.transcription factor families.HSF (heat shock)	HSF
Cc000163	RNA biosynthesis.transcription factor families.HSF (heat shock)	HSF
Cc022259	RNA biosynthesis.transcription factor families.HSF (heat shock)	HSF
Cc005012	RNA biosynthesis.transcription factor families.HSF (heat shock)	HSF
Cc017210	RNA biosynthesis.transcription factor families.HSF (heat shock)	HSF
Cc023427	RNA biosynthesis.transcription factor families.HSF (heat shock)	HSF
Cc021316	RNA biosynthesis.transcription factor families.HSF (heat shock)	HSF
Cc045740	RNA biosynthesis.transcription factor families.HSF (heat shock)	HSF
Cc012689	RNA biosynthesis.transcription factor families.HSF (heat shock)	HSF
Cc041371	RNA biosynthesis.transcription factor families.HSF (heat shock)	HSF
Cc044945	RNA biosynthesis.transcription factor families.HSF (heat shock)	HSF
Cc044772	RNA biosynthesis.transcription factor families.HSF (heat shock)	HSF
Cc023084	RNA biosynthesis.transcription factor families.HSF (heat shock)	HSF
Cc037262	RNA biosynthesis.transcription factor families.HSF (heat shock)	HSF
Cc015631	RNA biosynthesis.transcription factor families.HSF (heat shock)	HSF
Cc020872	RNA biosynthesis.transcription factor families.HSF (heat shock)	HSF
Cc004047	RNA biosynthesis.transcription factor families.HSF (heat shock)	HSF
Cc030940	RNA biosynthesis.transcription factor families.AS2/LOB transcription	LBD
Cc014012	RNA biosynthesis.transcription factor families.AS2/LOB transcription	LBD
Cc047377	RNA biosynthesis.transcription factor families.AS2/LOB transcription	LBD
Cc034647	RNA biosynthesis.transcription factor families.AS2/LOB transcription	LBD
Cc018560	RNA biosynthesis.transcription factor families.AS2/LOB transcription	LBD
Cc044251	RNA biosynthesis.transcription factor families.AS2/LOB transcription	LBD
Cc027822	RNA biosynthesis.transcription factor families.AS2/LOB transcription	LBD
Cc017015	RNA biosynthesis.transcription factor families.AS2/LOB transcription	LBD
Cc019494	RNA biosynthesis.transcription factor families.AS2/LOB transcription	LBD
Cc040073	RNA biosynthesis.transcription factor families.AS2/LOB transcription	LBD
Cc028769	RNA biosynthesis.transcription factor families.AS2/LOB transcription	LBD
Cc014936	RNA biosynthesis.transcription factor families.AS2/LOB transcription	LBD
Cc047334	RNA biosynthesis.transcription factor families.AS2/LOB transcription	LBD
Cc019141	RNA biosynthesis.transcription factor families.AS2/LOB transcription	LBD
Cc000348	Lipid metabolism.lipid bodies-associated activities.oleosin	LBD
Cc001121	RNA biosynthesis.transcription factor families.AS2/LOB transcription	LBD
Cc012261	RNA biosynthesis.transcription factor families.AS2/LOB transcription	LBD
Cc013904	RNA biosynthesis.transcription factor families.AS2/LOB transcription	LBD
Cc001329	RNA biosynthesis.transcription factor families.AS2/LOB transcription	LBD
Cc046910	RNA biosynthesis.transcription factor families.AS2/LOB transcription	LBD
Cc001593	RNA biosynthesis.transcription factor families.AS2/LOB transcription	LBD
Cc033382	RNA biosynthesis.transcription factor families.AS2/LOB transcription	LBD
Cc031034	RNA biosynthesis.transcription factor families.AS2/LOB transcription	LBD
Cc035972	RNA biosynthesis.transcription factor families.AS2/LOB transcription	LBD
Cc035870	RNA biosynthesis.transcription factor families.AS2/LOB transcription	LBD
Cc008201	RNA biosynthesis.transcription factor families.AS2/LOB transcription	LBD
Cc013133	RNA biosynthesis.transcription factor families.AS2/LOB transcription	LBD
Cc032995	RNA biosynthesis.transcription factor families.AS2/LOB transcription	LBD
Cc036239	RNA biosynthesis.transcription factor families.AS2/LOB transcription	LBD
Cc038963	RNA biosynthesis.transcription factor families.AS2/LOB transcription	LBD
Cc011061	RNA biosynthesis.transcription factor families.AS2/LOB transcription	LBD
Cc000703	RNA biosynthesis.transcription factor families.AS2/LOB transcription	LBD
Cc035691	RNA biosynthesis.transcription factor families.LFY transcription	LFY
Cc027883	RNA biosynthesis.transcription factor families.LFY transcription	LFY
Cc002804	Environmental stimuli response.programmed cell death (PCD).LSD/LOL	LSD
Cc018530	Environmental stimuli response.programmed cell death (PCD).LSD/LOL	LSD
Cc013404	Environmental stimuli response.programmed cell death (PCD).LSD/LOL	LSD
Cc004540	RNA biosynthesis.transcription factor families.MADS box transcription	M-type_MADS
Cc019671	RNA biosynthesis.transcription factor families.MADS box transcription	M-type_MADS
Cc007552	RNA biosynthesis.transcription factor families.MADS box transcription	MIKC_MADS
Cc010143	RNA biosynthesis.transcription factor families.MADS box transcription	MIKC_MADS
Cc002739	RNA biosynthesis.transcription factor families.MADS box transcription	MIKC_MADS
Cc006271	RNA biosynthesis.transcription factor families.MADS box transcription	MIKC_MADS
Cc028474	RNA biosynthesis.transcription factor families.MADS box transcription	MIKC_MADS
Cc027482	RNA biosynthesis.transcription factor families.MADS box transcription	MIKC_MADS
Cc001900	RNA biosynthesis.transcription factor families.MADS box transcription	MIKC_MADS
Cc022874	RNA biosynthesis.transcription factor families.MADS box transcription	MIKC_MADS
Cc025518	RNA biosynthesis.transcription factor families.MADS box transcription	MIKC_MADS
Cc033511	RNA biosynthesis.transcription factor families.MADS box transcription	MIKC_MADS
Cc027045	RNA biosynthesis.transcription factor families.MADS box transcription	MIKC_MADS
Cc034680	RNA biosynthesis.transcription factor families.MADS box transcription	MIKC_MADS
Cc004896	RNA biosynthesis.transcription factor families.MADS box transcription	MIKC_MADS
Cc031699	RNA biosynthesis.transcription factor families.MADS box transcription	MIKC_MADS
Cc026132	RNA biosynthesis.transcription factor families.MADS box transcription	MIKC_MADS
Cc021733	RNA biosynthesis.transcription factor families.MADS box transcription	MIKC_MADS
Cc031700	RNA biosynthesis.transcription factor families.MADS box transcription	MIKC_MADS
Cc002816	RNA biosynthesis.transcription factor families.MYB superfamily.MYB-related	MYB-related
Cc006359	RNA biosynthesis.transcription factor families.MYB superfamily.MYB-related	MYB-related
Cc010440	RNA biosynthesis.transcription factor families.MYB superfamily.MYB-related	MYB-related
Cc008129	RNA biosynthesis.transcription factor families.MYB superfamily.MYB-related	MYB-related
Cc013236	RNA biosynthesis.transcription factor families.MYB superfamily.MYB-related	MYB-related
Cc001187	RNA biosynthesis.transcription factor families.MYB superfamily.MYB-related	MYB-related
Cc007695	RNA biosynthesis.transcription factor families.MYB superfamily.MYB-related	MYB-related
Cc010295	RNA biosynthesis.transcription factor families.MYB superfamily.MYB-related	MYB-related
Cc007051	RNA biosynthesis.transcription factor families.MYB superfamily.MYB-related	MYB-related
Cc006627	RNA biosynthesis.transcription factor families.MYB superfamily.MYB-related	MYB-related
Cc033189	RNA biosynthesis.transcription factor families.MYB superfamily.MYB-related	MYB-related
Cc044820	RNA biosynthesis.transcription factor families.MYB superfamily.MYB-related	MYB-related
Cc023193	RNA biosynthesis.transcription factor families.MYB superfamily.MYB-related	MYB-related
Cc046090	Phytohormones.cytokinin.synthesis.cytokinin phosphoribohydrolase	MYB-related
Cc038650	RNA biosynthesis.transcription factor families.MYB superfamily.MYB	MYB-related
Cc030305	RNA biosynthesis.transcription factor families.MYB superfamily.MYB-related	MYB-related
Cc030994	RNA biosynthesis.transcription factor families.MYB superfamily.MYB-related	MYB-related
Cc022402	RNA biosynthesis.transcription factor families.MYB superfamily.MYB-related	MYB-related
Cc047281	Cell cycle.mitosis and meiosis.meiotic recombination.meiotic	MYB-related
Cc001015	RNA biosynthesis.transcription factor families.MYB superfamily.MYB-related	MYB-related
Cc033819	RNA biosynthesis.transcription factor families.MYB superfamily.MYB-related	MYB-related
Cc023540	RNA biosynthesis.transcription factor families.MYB superfamily.MYB-related	MYB-related
Cc014675	hypothetical protein	MYB-related
Cc027000	RNA biosynthesis.transcription factor families.MYB superfamily.MYB-related	MYB-related
Cc011595	RNA biosynthesis.transcription factor families.MYB superfamily.MYB-related	MYB-related
Cc009689	RNA biosynthesis.transcription factor families.MYB superfamily.MYB-related	MYB-related
Cc014120	RNA biosynthesis.transcription factor families.MYB superfamily.MYB-related	MYB-related
Cc023768	RNA biosynthesis.transcription factor families.MYB superfamily.MYB-related	MYB-related
Cc025330	RNA biosynthesis.transcription factor families.MYB superfamily.MYB-related	MYB-related
Cc017722	RNA biosynthesis.transcription factor families.MYB superfamily.MYB-related	MYB-related
Cc025193	RNA biosynthesis.transcription factor families.MYB superfamily.MYB-related	MYB-related
Cc012558	Protein modification.protein folding and quality control.RAC	MYB-related
Cc001659	RNA biosynthesis.transcription factor families.MYB superfamily.MYB-related	MYB-related
Cc047399	RNA biosynthesis.transcription factor families.MYB superfamily.MYB-related	MYB-related
Cc034625	RNA biosynthesis.transcription factor families.MYB superfamily.MYB-related	MYB-related
Cc039306	RNA biosynthesis.transcription factor families.MYB superfamily.MYB-related	MYB-related
Cc024601	RNA biosynthesis.transcription factor families.MYB superfamily.MYB-related	MYB-related
Cc010583	RNA biosynthesis.RNA polymerase I-dependent transcription.TTF1	MYB-related
Cc026880	RNA biosynthesis.RNA polymerase I-dependent transcription.TTF1	MYB-related
Cc011005	RNA biosynthesis.RNA polymerase I-dependent transcription.TTF1	MYB-related
Cc004208	RNA biosynthesis.RNA polymerase I-dependent transcription.TTF1	MYB-related
Cc004207	RNA biosynthesis.RNA polymerase I-dependent transcription.TTF1	MYB-related
Cc011004	RNA biosynthesis.RNA polymerase I-dependent transcription.TTF1	MYB-related
Cc034806	RNA biosynthesis.transcription factor families.MYB superfamily.MYB	MYB-related
Cc009788	RNA biosynthesis.transcription factor families.MYB superfamily.MYB	MYB-related
Cc008304	RNA biosynthesis.transcription factor families.MYB superfamily.MYB	MYB-related
Cc014485	RNA biosynthesis.transcription factor families.MYB superfamily.MYB-related	MYB-related
Cc024590	RNA biosynthesis.transcription factor families.MYB superfamily.MYB	MYB-related
Cc032303	RNA biosynthesis.transcription factor families.MYB superfamily.MYB	MYB-related
Cc022314	RNA biosynthesis.transcription factor families.MYB superfamily.MYB	MYB-related
Cc012243	RNA biosynthesis.transcription factor families.MYB superfamily.MYB	MYB-related
Cc017538	RNA biosynthesis.transcription factor families.MYB superfamily.MYB	MYB-related
Cc002657	RNA biosynthesis.transcription factor families.MYB superfamily.MYB	MYB-related
Cc012479	RNA biosynthesis.transcription factor families.MYB superfamily.MYB	MYB-related
Cc029659	RNA biosynthesis.transcription factor families.MYB superfamily.MYB	MYB-related
Cc007586	RNA biosynthesis.transcription factor families.MYB superfamily.MYB	MYB-related
Cc020028	RNA biosynthesis.transcription factor families.MYB superfamily.MYB	MYB-related
Cc021191	RNA biosynthesis.transcription factor families.MYB superfamily.MYB	MYB-related
Cc026812	RNA biosynthesis.transcription factor families.MYB superfamily.MYB	MYB-related
Cc016511	RNA biosynthesis.transcription factor families.MYB superfamily.MYB-related	MYB-related
Cc000859	RNA biosynthesis.transcription factor families.MYB superfamily.MYB-related	MYB-related
Cc037328	RNA biosynthesis.transcription factor families.MYB superfamily.MYB	MYB-related
Cc046997	RNA biosynthesis.transcription factor families.MYB superfamily.MYB-related	MYB-related
Cc028426	RNA biosynthesis.transcription factor families.MYB superfamily.MYB-related	MYB-related
Cc014898	RNA biosynthesis.transcription factor families.MYB superfamily.MYB-related	MYB-related
Cc044919	hypothetical protein	MYB-related
Cc037290	hypothetical protein	MYB-related
Cc009830	RNA biosynthesis.transcription factor families.MYB superfamily.MYB	MYB
Cc023910	RNA biosynthesis.transcription factor families.MYB superfamily.MYB	MYB
Cc008347	RNA biosynthesis.transcription factor families.MYB superfamily.MYB	MYB
Cc001800	RNA biosynthesis.transcription factor families.MYB superfamily.MYB	MYB
Cc010173	RNA biosynthesis.transcription factor families.MYB superfamily.MYB	MYB
Cc020775	RNA biosynthesis.transcription factor families.MYB superfamily.MYB	MYB
Cc007050	RNA biosynthesis.transcription factor families.MYB superfamily.MYB	MYB
Cc045554	RNA biosynthesis.transcription factor families.MYB superfamily.MYB	MYB
Cc035894	RNA biosynthesis.transcription factor families.MYB superfamily.MYB	MYB
Cc041474	RNA biosynthesis.transcription factor families.MYB superfamily.MYB	MYB
Cc037076	RNA biosynthesis.transcription factor families.MYB superfamily.MYB	MYB
Cc015702	RNA biosynthesis.transcription factor families.MYB superfamily.MYB	MYB
Cc021269	RNA biosynthesis.transcription factor families.MYB superfamily.MYB	MYB
Cc026278	RNA biosynthesis.transcription factor families.MYB superfamily.MYB	MYB
Cc023188	RNA biosynthesis.transcription factor families.MYB superfamily.MYB	MYB
Cc035525	RNA biosynthesis.transcription factor families.MYB superfamily.MYB	MYB
Cc031654	RNA biosynthesis.transcription factor families.MYB superfamily.MYB	MYB
Cc004853	RNA biosynthesis.transcription factor families.MYB superfamily.MYB	MYB
Cc029585	RNA biosynthesis.transcription factor families.MYB superfamily.MYB	MYB
Cc044009	RNA biosynthesis.transcription factor families.MYB superfamily.MYB	MYB
Cc023722	RNA biosynthesis.transcription factor families.MYB superfamily.MYB	MYB
Cc005682	RNA biosynthesis.transcription factor families.MYB superfamily.MYB	MYB
Cc046956	RNA biosynthesis.transcription factor families.MYB superfamily.MYB	MYB
Cc001277	RNA biosynthesis.transcription factor families.MYB superfamily.MYB	MYB
Cc003033	RNA biosynthesis.transcription factor families.MYB superfamily.MYB	MYB
Cc025381	RNA biosynthesis.transcription factor families.MYB superfamily.MYB	MYB
Cc002454	RNA biosynthesis.transcription factor families.MYB superfamily.MYB	MYB
Cc014405	RNA biosynthesis.transcription factor families.MYB superfamily.MYB	MYB
Cc013277	RNA biosynthesis.transcription factor families.MYB superfamily.MYB	MYB
Cc014899	RNA biosynthesis.transcription factor families.MYB superfamily.MYB	MYB
Cc017463	RNA biosynthesis.transcription factor families.MYB superfamily.MYB	MYB
Cc011548	RNA biosynthesis.transcription factor families.MYB superfamily.MYB	MYB
Cc028172	RNA biosynthesis.transcription factor families.MYB superfamily.MYB	MYB
Cc010815	RNA biosynthesis.transcription factor families.MYB superfamily.MYB	MYB
Cc005247	RNA biosynthesis.transcription factor families.MYB superfamily.MYB	MYB
Cc038092	RNA biosynthesis.transcription factor families.MYB superfamily.MYB	MYB
Cc034291	RNA biosynthesis.transcription factor families.MYB superfamily.MYB	MYB
Cc031484	RNA biosynthesis.transcription factor families.MYB superfamily.MYB	MYB
Cc022579	RNA biosynthesis.transcription factor families.MYB superfamily.MYB	MYB
Cc000086	RNA biosynthesis.transcription factor families.MYB superfamily.MYB	MYB
Cc005168	RNA biosynthesis.transcription factor families.MYB superfamily.MYB	MYB
Cc010644	RNA biosynthesis.transcription factor families.MYB superfamily.MYB	MYB
Cc019208	RNA biosynthesis.transcription factor families.MYB superfamily.MYB	MYB
Cc018987	RNA biosynthesis.transcription factor families.MYB superfamily.MYB	MYB
Cc007565	RNA biosynthesis.transcription factor families.MYB superfamily.MYB	MYB
Cc044602	RNA biosynthesis.transcription factor families.MYB superfamily.MYB	MYB
Cc000285	RNA biosynthesis.transcription factor families.MYB superfamily.MYB	MYB
Cc004537	RNA biosynthesis.transcription factor families.MYB superfamily.MYB	MYB
Cc022523	RNA biosynthesis.transcription factor families.MYB superfamily.MYB	MYB
Cc016756	RNA biosynthesis.transcription factor families.MYB superfamily.MYB	MYB
Cc025004	Phytohormones.ethylene.synthesis.1-aminocyclopropane-1-carboxylate	MYB
Cc019675	RNA biosynthesis.transcription factor families.MYB superfamily.MYB	MYB
Cc023510	RNA biosynthesis.transcription factor families.MYB superfamily.MYB	MYB
Cc014696	RNA biosynthesis.transcription factor families.MYB superfamily.MYB	MYB
Cc018453	RNA biosynthesis.transcription factor families.MYB superfamily.MYB	MYB
Cc016476	RNA biosynthesis.transcription factor families.MYB superfamily.MYB	MYB
Cc000889	RNA biosynthesis.transcription factor families.MYB superfamily.MYB	MYB
Cc021841	RNA biosynthesis.transcription factor families.MYB superfamily.MYB	MYB
Cc015995	RNA biosynthesis.transcription factor families.MYB superfamily.MYB	MYB
Cc018302	RNA biosynthesis.transcription factor families.MYB superfamily.MYB	MYB
Cc006106	RNA biosynthesis.transcription factor families.MYB superfamily.MYB	MYB
Cc045639	RNA biosynthesis.transcription factor families.MYB superfamily.MYB	MYB
Cc013352	RNA biosynthesis.transcription factor families.MYB superfamily.MYB	MYB
Cc006883	RNA biosynthesis.transcription factor families.MYB superfamily.MYB	MYB
Cc007797	RNA biosynthesis.transcription factor families.MYB superfamily.MYB	MYB
Cc047363	RNA biosynthesis.transcription factor families.MYB superfamily.MYB	MYB
Cc044559	RNA biosynthesis.transcription factor families.MYB superfamily.MYB	MYB
Cc017460	RNA biosynthesis.transcription factor families.MYB superfamily.MYB-related	MYB
Cc000944	RNA biosynthesis.transcription factor families.MYB superfamily.MYB-related	MYB
Cc040119	RNA biosynthesis.transcription factor families.MYB superfamily.MYB-related	MYB
Cc030494	RNA biosynthesis.transcription factor families.MYB superfamily.MYB-related	MYB
Cc026281	RNA biosynthesis.transcription factor families.MYB superfamily.MYB-related	MYB
Cc010365	RNA biosynthesis.transcription factor families.MYB superfamily.MYB-related	MYB
Cc022369	RNA biosynthesis.transcription factor families.MYB superfamily.MYB-related	MYB
Cc028816	RNA biosynthesis.transcription factor families.MYB superfamily.MYB-related	MYB
Cc046563	RNA biosynthesis.transcription factor families.MYB superfamily.MYB-related	MYB
Cc026627	RNA biosynthesis.transcription factor families.MYB superfamily.MYB	MYB
Cc030624	RNA biosynthesis.transcription factor families.MYB superfamily.MYB	MYB
Cc024830	RNA biosynthesis.transcription factor families.MYB superfamily.MYB	MYB
Cc020596	RNA biosynthesis.transcription factor families.MYB superfamily.MYB	MYB
Cc009819	RNA biosynthesis.transcription factor families.MYB superfamily.MYB	MYB
Cc008337	RNA biosynthesis.transcription factor families.MYB superfamily.MYB	MYB
Cc014070	RNA biosynthesis.transcription factor families.MYB superfamily.MYB	MYB
Cc011529	RNA biosynthesis.transcription factor families.MYB superfamily.MYB	MYB
Cc031971	RNA biosynthesis.transcription factor families.MYB superfamily.MYB	MYB
Cc030490	RNA biosynthesis.transcription factor families.MYB superfamily.MYB	MYB
Cc020250	RNA biosynthesis.transcription factor families.MYB superfamily.MYB	MYB
Cc026595	RNA biosynthesis.transcription factor families.MYB superfamily.MYB	MYB
Cc021646	hypothetical protein	MYB
Cc022353	RNA biosynthesis.transcription factor families.MYB superfamily.MYB	MYB
Cc010348	RNA biosynthesis.transcription factor families.MYB superfamily.MYB	MYB
Cc003058	RNA biosynthesis.transcription factor families.MYB superfamily.MYB	MYB
Cc027087	RNA biosynthesis.transcription factor families.MYB superfamily.MYB	MYB
Cc000958	hypothetical protein	MYB
Cc043219	RNA biosynthesis.transcription factor families.MYB superfamily.MYB	MYB
Cc041060	RNA biosynthesis.transcription factor families.MYB superfamily.MYB	MYB
Cc021980	hypothetical protein	MYB
Cc044328	hypothetical protein	MYB
Cc030384	RNA biosynthesis.transcription factor families.MYB superfamily.MYB	MYB
Cc011764	RNA biosynthesis.transcription factor families.MYB superfamily.MYB	MYB
Cc032784	RNA biosynthesis.transcription factor families.MYB superfamily.MYB	MYB
Cc000934	RNA biosynthesis.transcription factor families.MYB superfamily.MYB	MYB
Cc017924	RNA biosynthesis.transcription factor families.MYB superfamily.MYB	MYB
Cc036397	RNA biosynthesis.transcription factor families.MYB superfamily.MYB	MYB
Cc006881	hypothetical protein	MYB
Cc025952	RNA biosynthesis.transcription factor families.NAC transcription	NAC
Cc003896	RNA biosynthesis.transcription factor families.NAC transcription	NAC
Cc008537	RNA biosynthesis.transcription factor families.NAC transcription	NAC
Cc008641	RNA biosynthesis.transcription factor families.NAC transcription	NAC
Cc008640	RNA biosynthesis.transcription factor families.NAC transcription	NAC
Cc008538	RNA biosynthesis.transcription factor families.NAC transcription	NAC
Cc011447	RNA biosynthesis.transcription factor families.NAC transcription	NAC
Cc047094	RNA biosynthesis.transcription factor families.NAC transcription	NAC
Cc034318	RNA biosynthesis.transcription factor families.NAC transcription	NAC
Cc006125	RNA biosynthesis.transcription factor families.NAC transcription	NAC
Cc047153	RNA biosynthesis.transcription factor families.NAC transcription	NAC
Cc014846	RNA biosynthesis.transcription factor families.NAC transcription	NAC
Cc011370	RNA biosynthesis.transcription factor families.NAC transcription	NAC
Cc032105	Phytohormones.cytokinin.synthesis.cytokinin phosphoribohydrolase	NAC
Cc044877	RNA biosynthesis.transcription factor families.NAC transcription	NAC
Cc033872	RNA biosynthesis.transcription factor families.NAC transcription	NAC
Cc000288	RNA biosynthesis.transcription factor families.NAC transcription	NAC
Cc019206	RNA biosynthesis.transcription factor families.NAC transcription	NAC
Cc022118	RNA biosynthesis.transcription factor families.NAC transcription	NAC
Cc046698	RNA biosynthesis.transcription factor families.NAC transcription	NAC
Cc035862	RNA biosynthesis.transcription factor families.NAC transcription	NAC
Cc019692	RNA biosynthesis.transcription factor families.NAC transcription	NAC
Cc016815	RNA biosynthesis.transcription factor families.NAC transcription	NAC
Cc004518	RNA biosynthesis.transcription factor families.NAC transcription	NAC
Cc035983	RNA biosynthesis.transcription factor families.NAC transcription	NAC
Cc007597	RNA biosynthesis.transcription factor families.NAC transcription	NAC
Cc013930	RNA biosynthesis.transcription factor families.NAC transcription	NAC
Cc000010	RNA biosynthesis.transcription factor families.NAC transcription	NAC
Cc023451	RNA biosynthesis.transcription factor families.NAC transcription	NAC
Cc031573	RNA biosynthesis.transcription factor families.NAC transcription	NAC
Cc005492	RNA biosynthesis.transcription factor families.NAC transcription	NAC
Cc016299	RNA biosynthesis.transcription factor families.NAC transcription	NAC
Cc022030	RNA biosynthesis.transcription factor families.NAC transcription	NAC
Cc030154	RNA biosynthesis.transcription factor families.NAC transcription	NAC
Cc028255	RNA biosynthesis.transcription factor families.NAC transcription	NAC
Cc029096	RNA biosynthesis.transcription factor families.NAC transcription	NAC
Cc000379	RNA biosynthesis.transcription factor families.NAC transcription	NAC
Cc047545	RNA biosynthesis.transcription factor families.NAC transcription	NAC
Cc005252	RNA biosynthesis.transcription factor families.NAC transcription	NAC
Cc030628	RNA biosynthesis.transcription factor families.NAC transcription	NAC
Cc019108	RNA biosynthesis.transcription factor families.NAC transcription	NAC
Cc018306	RNA biosynthesis.transcription factor families.NAC transcription	NAC
Cc026611	RNA biosynthesis.transcription factor families.NAC transcription	NAC
Cc026622	RNA biosynthesis.transcription factor families.NAC transcription	NAC
Cc010187	RNA biosynthesis.transcription factor families.NAC transcription	NAC
Cc017122	RNA biosynthesis.transcription factor families.NAC transcription	NAC
Cc002268	RNA biosynthesis.transcription factor families.NAC transcription	NAC
Cc008390	RNA biosynthesis.transcription factor families.NAC transcription	NAC
Cc034476	RNA biosynthesis.transcription factor families.NAC transcription	NAC
Cc009879	RNA biosynthesis.transcription factor families.NAC transcription	NAC
Cc030638	RNA biosynthesis.transcription factor families.NAC transcription	NAC
Cc028409	RNA biosynthesis.transcription factor families.NAC transcription	NAC
Cc044484	RNA biosynthesis.transcription factor families.NAC transcription	NAC
Cc019946	RNA biosynthesis.transcription factor families.NAC transcription	NAC
Cc010132	RNA biosynthesis.transcription factor families.NAC transcription	NAC
Cc030086	RNA biosynthesis.transcription factor families.NAC transcription	NAC
Cc007540	RNA biosynthesis.transcription factor families.NAC transcription	NAC
Cc034042	RNA biosynthesis.transcription factor families.NAC transcription	NAC
Cc022051	RNA biosynthesis.transcription factor families.NAC transcription	NAC
Cc015467	RNA biosynthesis.transcription factor families.NAC transcription	NAC
Cc032050	RNA biosynthesis.transcription factor families.NAC transcription	NAC
Cc015965	RNA biosynthesis.transcription factor families.NAC transcription	NAC
Cc018566	RNA biosynthesis.transcription factor families.NAC transcription	NAC
Cc046230	RNA biosynthesis.transcription factor families.NAC transcription	NAC
Cc015350	RNA biosynthesis.transcription factor families.NAC transcription	NAC
Cc022681	RNA biosynthesis.transcription factor families.NAC transcription	NAC
Cc013311	RNA biosynthesis.transcription factor families.NAC transcription	NAC
Cc008800	RNA biosynthesis.transcription factor families.NAC transcription	NAC
Cc016063	RNA biosynthesis.transcription factor families.NAC transcription	NAC
Cc021537	RNA biosynthesis.transcription factor families.NAC transcription	NAC
Cc032565	DNA damage response.DNA damage sensing and signaling.DNA damage	NAC
Cc004935	DNA damage response.DNA damage sensing and signaling.DNA damage	NAC
Cc029617	DNA damage response.DNA damage sensing and signaling.DNA damage	NAC
Cc012458	DNA damage response.DNA damage sensing and signaling.DNA damage	NAC
Cc002967	RNA biosynthesis.transcription factor families.NAC transcription	NAC
Cc032666	RNA biosynthesis.transcription factor families.NAC transcription	NAC
Cc018403	RNA biosynthesis.transcription factor families.NAC transcription	NAC
Cc011450	hypothetical protein	NAC
Cc030872	RNA biosynthesis.transcription factor families.NAC transcription	NAC
Cc046929	hypothetical protein	NF-X1
Cc001310	hypothetical protein	NF-X1
Cc035693	hypothetical protein	NF-X1
Cc027880	hypothetical protein	NF-X1
Cc013414	RNA biosynthesis.transcription factor families.NF-Y transcription	NF-YA
Cc028312	RNA biosynthesis.transcription factor families.NF-Y transcription	NF-YA
Cc017046	RNA biosynthesis.transcription factor families.NF-Y transcription	NF-YA
Cc015877	RNA biosynthesis.transcription factor families.NF-Y transcription	NF-Y
Cc004117	RNA biosynthesis.transcription factor families.NF-Y transcription	NF-Y
Cc020935	RNA biosynthesis.transcription factor families.NF-Y transcription	NF-Y
Cc021140	RNA biosynthesis.transcription factor families.NF-Y transcription	NF-Y
Cc019572	RNA biosynthesis.transcription factor families.NF-Y transcription	NF-Y
Cc002233	RNA biosynthesis.transcription factor families.NF-Y transcription	NF-Y
Cc017071	RNA biosynthesis.RNA polymerase II-dependent transcription.pre-initiation	NF-YC
Cc028344	RNA biosynthesis.RNA polymerase II-dependent transcription.pre-initiation	NF-YC
Cc027404	RNA biosynthesis.RNA polymerase II-dependent transcription.pre-initiation	NF-YC
Cc019076	Chromatin assembly and remodeling.histones.H2A-type histone	NF-YC
Cc000413	Chromatin assembly and remodeling.histones.H2A-type histone	NF-YC
Cc020407	RNA biosynthesis.RNA polymerase II-dependent transcription.pre-initiation	NF-YC
Cc011177	RNA biosynthesis.RNA polymerase II-dependent transcription.pre-initiation	NF-YC
Cc020693	RNA biosynthesis.transcription factor families.NF-Y transcription	NF-YC
Cc027947	RNA biosynthesis.transcription factor families.NIN-like superfamily.NLP	Nin-like
Cc003662	RNA biosynthesis.transcription factor families.NIN-like superfamily.NLP	Nin-like
Cc015430	RNA biosynthesis.transcription factor families.NIN-like superfamily.NLP	Nin-like
Cc023023	RNA biosynthesis.transcription factor families.B3 superfamily.RAV/NGATHA	RAV
Cc045075	RNA biosynthesis.transcription factor families.B3 superfamily.RAV/NGATHA	RAV
Cc023093	RNA biosynthesis.transcription factor families.B3 superfamily.RAV/NGATHA	RAV
Cc015621	RNA biosynthesis.transcription factor families.B3 superfamily.RAV/NGATHA	RAV
Cc009361	RNA biosynthesis.transcription factor families.SAP transcription	SAP
Cc015262	RNA biosynthesis.transcription factor families.SAP transcription	SAP
Cc002187	RNA biosynthesis.transcription factor families.SBP transcription	SBP
Cc019627	RNA biosynthesis.transcription factor families.SBP transcription	SBP
Cc029926	RNA biosynthesis.transcription factor families.SBP transcription	SBP
Cc018151	RNA biosynthesis.transcription factor families.SBP transcription	SBP
Cc011041	RNA biosynthesis.transcription factor families.SBP transcription	SBP
Cc018895	RNA biosynthesis.transcription factor families.SBP transcription	SBP
Cc017902	RNA biosynthesis.transcription factor families.SBP transcription	SBP
Cc044512	RNA biosynthesis.transcription factor families.SBP transcription	SBP
Cc030791	RNA biosynthesis.transcription factor families.SBP transcription	SBP
Cc004892	RNA biosynthesis.transcription factor families.SBP transcription	SBP
Cc022994	RNA biosynthesis.transcription factor families.SBP transcription	SBP
Cc019979	RNA biosynthesis.transcription factor families.SBP transcription	SBP
Cc007551	RNA biosynthesis.transcription factor families.SBP transcription	SBP
Cc027561	RNA biosynthesis.transcription factor families.SBP transcription	SBP
Cc000741	RNA biosynthesis.transcription factor families.SBP transcription	SBP
Cc041719	RNA biosynthesis.transcription factor families.SBP transcription	SBP
Cc039191	RNA biosynthesis.transcription factor families.SBP transcription	SBP
Cc004242	RNA biosynthesis.transcription factor families.SBP transcription	SBP
Cc044540	RNA biosynthesis.transcription factor families.SBP transcription	SBP
Cc020008	RNA biosynthesis.transcription factor families.SBP transcription	SBP
Cc007553	RNA biosynthesis.transcription factor families.SBP transcription	SBP
Cc010144	RNA biosynthesis.transcription factor families.SBP transcription	SBP
Cc006335	RNA biosynthesis.transcription factor families.SBP transcription	SBP
Cc002792	RNA biosynthesis.transcription factor families.SBP transcription	SBP
Cc010142	RNA biosynthesis.transcription factor families.SBP transcription	SBP
Cc045103	RNA biosynthesis.transcription factor families.SBP transcription	SBP
Cc009761	RNA biosynthesis.transcription factor families.SBP transcription	SBP
Cc008277	RNA biosynthesis.transcription factor families.SBP transcription	SBP
Cc021735	RNA biosynthesis.transcription factor families.SRS transcription	SRS
Cc014138	RNA biosynthesis.transcription factor families.SRS transcription	SRS
Cc026130	RNA biosynthesis.transcription factor families.SRS transcription	SRS
Cc035099	RNA biosynthesis.transcription factor families.SRS transcription	SRS
Cc026774	RNA biosynthesis.transcription factor families.SRS transcription	SRS
Cc047530	RNA biosynthesis.transcription factor families.SRS transcription	SRS
Cc034492	RNA biosynthesis.transcription factor families.SRS transcription	SRS
Cc001760	RNA biosynthesis.transcription factor families.SRS transcription	SRS
Cc023874	RNA biosynthesis.transcription factor families.SRS transcription	SRS
Cc027723	hypothetical protein	SRS
Cc034109	hypothetical protein	STAT
Cc034195	hypothetical protein	STAT
Cc011049	RNA biosynthesis.transcription factor families.C2C2 superfamily.YABBY	YABBY
Cc004251	RNA biosynthesis.transcription factor families.C2C2 superfamily.YABBY	YABBY
Cc031695	RNA biosynthesis.transcription factor families.C2C2 superfamily.YABBY	YABBY
Cc004891	RNA biosynthesis.transcription factor families.C2C2 superfamily.YABBY	YABBY
Cc010673	RNA biosynthesis.transcription factor families.C2C2 superfamily.YABBY	YABBY
Cc045648	RNA biosynthesis.transcription factor families.HB (Homeobox)	TALE
Cc033481	RNA biosynthesis.transcription factor families.HB (Homeobox)	TALE
Cc024997	RNA biosynthesis.transcription factor families.HB (Homeobox)	TALE
Cc026772	RNA biosynthesis.transcription factor families.HB (Homeobox)	TALE
Cc033347	RNA biosynthesis.transcription factor families.HB (Homeobox)	TALE
Cc013984	RNA biosynthesis.transcription factor families.HB (Homeobox)	TALE
Cc039304	RNA biosynthesis.transcription factor families.HB (Homeobox)	TALE
Cc024603	RNA biosynthesis.transcription factor families.HB (Homeobox)	TALE
Cc043976	RNA biosynthesis.transcription factor families.HB (Homeobox)	TALE
Cc005653	RNA biosynthesis.transcription factor families.HB (Homeobox)	TALE
Cc030963	RNA biosynthesis.transcription factor families.HB (Homeobox)	TALE
Cc017839	RNA biosynthesis.transcription factor families.HB (Homeobox)	TALE
Cc030244	RNA biosynthesis.transcription factor families.HB (Homeobox)	TALE
Cc010168	RNA biosynthesis.transcription factor families.TCP transcription	TCP
Cc007581	RNA biosynthesis.transcription factor families.TCP transcription	TCP
Cc022934	RNA biosynthesis.transcription factor families.TCP transcription	TCP
Cc045165	RNA biosynthesis.transcription factor families.TCP transcription	TCP
Cc045269	RNA biosynthesis.transcription factor families.TCP transcription	TCP
Cc006523	RNA biosynthesis.transcription factor families.TCP transcription	TCP
Cc007152	RNA biosynthesis.transcription factor families.TCP transcription	TCP
Cc001411	RNA biosynthesis.transcription factor families.TCP transcription	TCP
Cc046835	RNA biosynthesis.transcription factor families.TCP transcription	TCP
Cc030804	RNA biosynthesis.transcription factor families.TCP transcription	TCP
Cc018085	RNA biosynthesis.transcription factor families.TCP transcription	TCP
Cc019334	RNA biosynthesis.transcription factor families.TCP transcription	TCP
Cc010136	RNA biosynthesis.transcription factor families.TCP transcription	TCP
Cc013688	RNA biosynthesis.transcription factor families.TCP transcription	TCP
Cc040165	RNA biosynthesis.transcription factor families.TCP transcription	TCP
Cc004933	RNA biosynthesis.transcription factor families.TCP transcription	TCP
Cc002690	RNA biosynthesis.transcription factor families.TCP transcription	TCP
Cc030653	RNA biosynthesis.transcription factor families.TCP transcription	TCP
Cc022225	RNA biosynthesis.transcription factor families.Trihelix transcription	Trihelix
Cc004974	RNA biosynthesis.transcription factor families.Trihelix transcription	Trihelix
Cc045374	RNA biosynthesis.transcription factor families.Trihelix transcription	Trihelix
Cc013097	RNA biosynthesis.transcription factor families.Trihelix transcription	Trihelix
Cc021587	RNA biosynthesis.transcription factor families.Trihelix transcription	Trihelix
Cc036773	RNA biosynthesis.transcription factor families.Trihelix transcription	Trihelix
Cc019920	hypothetical protein	Trihelix
Cc044454	hypothetical protein	Trihelix
Cc002594	hypothetical protein	Trihelix
Cc014545	hypothetical protein	Trihelix
Cc004266	RNA biosynthesis.transcription factor families.Trihelix transcription	Trihelix
Cc005118	RNA biosynthesis.transcription factor families.Trihelix transcription	Trihelix
Cc011017	RNA biosynthesis.transcription factor families.Trihelix transcription	Trihelix
Cc004217	RNA biosynthesis.transcription factor families.Trihelix transcription	Trihelix
Cc024342	RNA biosynthesis.transcription factor families.Trihelix transcription	Trihelix
Cc030142	RNA biosynthesis.transcription factor families.Trihelix transcription	Trihelix
Cc014815	RNA biosynthesis.transcription factor families.Trihelix transcription	Trihelix
Cc028267	RNA biosynthesis.transcription factor families.Trihelix transcription	Trihelix
Cc033847	RNA biosynthesis.transcription factor families.Trihelix transcription	Trihelix
Cc017781	RNA biosynthesis.transcription factor families.Trihelix transcription	Trihelix
Cc030852	RNA biosynthesis.transcription factor families.Trihelix transcription	Trihelix
Cc028262	hypothetical protein	Trihelix
Cc030148	hypothetical protein	Trihelix
Cc022903	RNA biosynthesis.transcription factor families.Trihelix transcription	Trihelix
Cc041382	RNA biosynthesis.transcription factor families.Trihelix transcription	Trihelix
Cc012699	RNA biosynthesis.transcription factor families.Trihelix transcription	Trihelix
Cc008777	RNA biosynthesis.transcription factor families.Trihelix transcription	Trihelix
Cc003578	hypothetical protein	Trihelix
Cc009084	RNA biosynthesis.transcription factor families.Trihelix transcription	Trihelix
Cc005890	RNA biosynthesis.transcription factor families.Trihelix transcription	Trihelix
Cc036643	hypothetical protein	Trihelix
Cc005549	hypothetical protein	Trihelix
Cc030851	hypothetical protein	Trihelix
Cc038363	RNA biosynthesis.transcription factor families.Trihelix transcription	Trihelix
Cc024188	RNA biosynthesis.transcription factor families.Trihelix transcription	Trihelix
Cc016081	RNA processing.organelle machineries.ribonuclease activities.RNase	Trihelix
Cc008816	RNA processing.organelle machineries.ribonuclease activities.RNase	Trihelix
Cc036383	RNA biosynthesis.transcription factor families.Trihelix transcription	Trihelix
Cc012923	hypothetical protein	Trihelix
Cc002781	RNA biosynthesis.transcription factor families.VOZ transcription	VOZ
Cc006324	RNA biosynthesis.transcription factor families.VOZ transcription	VOZ
Cc041403	RNA biosynthesis.transcription factor families.VOZ transcription	VOZ
Cc012726	RNA biosynthesis.transcription factor families.VOZ transcription	VOZ
Cc012721	RNA biosynthesis.transcription factor families.VOZ transcription	VOZ
Cc033798	RNA biosynthesis.transcription factor families.HB (Homeobox)	WOX
Cc030905	RNA biosynthesis.transcription factor families.HB (Homeobox)	WOX
Cc020050	RNA biosynthesis.transcription factor families.WRKY transcription	WRKY
Cc019959	RNA biosynthesis.transcription factor families.WRKY transcription	WRKY
Cc041795	RNA biosynthesis.transcription factor families.WRKY transcription	WRKY
Cc017133	RNA biosynthesis.transcription factor families.WRKY transcription	WRKY
Cc044495	RNA biosynthesis.transcription factor families.WRKY transcription	WRKY
Cc001912	RNA biosynthesis.transcription factor families.WRKY transcription	WRKY
Cc015170	RNA biosynthesis.transcription factor families.WRKY transcription	WRKY
Cc008724	RNA biosynthesis.transcription factor families.WRKY transcription	WRKY
Cc034835	RNA biosynthesis.transcription factor families.WRKY transcription	WRKY
Cc000278	RNA biosynthesis.transcription factor families.WRKY transcription	WRKY
Cc019215	RNA biosynthesis.transcription factor families.WRKY transcription	WRKY
Cc022962	RNA biosynthesis.transcription factor families.WRKY transcription	WRKY
Cc045131	RNA biosynthesis.transcription factor families.WRKY transcription	WRKY
Cc002879	RNA biosynthesis.transcription factor families.WRKY transcription	WRKY
Cc006426	RNA biosynthesis.transcription factor families.WRKY transcription	WRKY
Cc000508	RNA biosynthesis.transcription factor families.WRKY transcription	WRKY
Cc009403	RNA biosynthesis.transcription factor families.WRKY transcription	WRKY
Cc020704	RNA biosynthesis.transcription factor families.WRKY transcription	WRKY
Cc025547	RNA biosynthesis.transcription factor families.WRKY transcription	WRKY
Cc024701	RNA biosynthesis.transcription factor families.WRKY transcription	WRKY
Cc015829	RNA biosynthesis.transcription factor families.WRKY transcription	WRKY
Cc025556	RNA biosynthesis.transcription factor families.WRKY transcription	WRKY
Cc003296	RNA biosynthesis.transcription factor families.WRKY transcription	WRKY
Cc027310	RNA biosynthesis.transcription factor families.WRKY transcription	WRKY
Cc018976	RNA biosynthesis.transcription factor families.WRKY transcription	WRKY
Cc011197	RNA biosynthesis.transcription factor families.WRKY transcription	WRKY
Cc020386	RNA biosynthesis.transcription factor families.WRKY transcription	WRKY
Cc041556	RNA biosynthesis.transcription factor families.WRKY transcription	WRKY
Cc011998	RNA biosynthesis.transcription factor families.WRKY transcription	WRKY
Cc000775	RNA biosynthesis.transcription factor families.WRKY transcription	WRKY
Cc020891	RNA biosynthesis.transcription factor families.WRKY transcription	WRKY
Cc011839	RNA biosynthesis.transcription factor families.WRKY transcription	WRKY
Cc004070	RNA biosynthesis.transcription factor families.WRKY transcription	WRKY
Cc012363	RNA biosynthesis.transcription factor families.WRKY transcription	WRKY
Cc022865	RNA biosynthesis.transcription factor families.WRKY transcription	WRKY
Cc003137	RNA biosynthesis.transcription factor families.NIN-like superfamily.RKD	WRKY
Cc014028	RNA biosynthesis.transcription factor families.WRKY transcription	WRKY
Cc023677	RNA biosynthesis.transcription factor families.WRKY transcription	WRKY
Cc022650	RNA biosynthesis.transcription factor families.WRKY transcription	WRKY
Cc027157	RNA biosynthesis.transcription factor families.WRKY transcription	WRKY
Cc000152	RNA biosynthesis.transcription factor families.WRKY transcription	WRKY
Cc018680	RNA biosynthesis.transcription factor families.WRKY transcription	WRKY
Cc009894	RNA biosynthesis.transcription factor families.WRKY transcription	WRKY
Cc008403	RNA biosynthesis.transcription factor families.WRKY transcription	WRKY
Cc021184	RNA biosynthesis.transcription factor families.WRKY transcription	WRKY
Cc002873	RNA biosynthesis.transcription factor families.WRKY transcription	WRKY
Cc006418	RNA biosynthesis.transcription factor families.WRKY transcription	WRKY
Cc044579	RNA biosynthesis.transcription factor families.WRKY transcription	WRKY
Cc002754	RNA biosynthesis.transcription factor families.WRKY transcription	WRKY
Cc006288	RNA biosynthesis.transcription factor families.WRKY transcription	WRKY
Cc012129	RNA biosynthesis.transcription factor families.WRKY transcription	WRKY
Cc012114	RNA biosynthesis.transcription factor families.WRKY transcription	WRKY
Cc041664	RNA biosynthesis.transcription factor families.WRKY transcription	WRKY
Cc044015	RNA biosynthesis.transcription factor families.WRKY transcription	WRKY
Cc031506	RNA biosynthesis.transcription factor families.WRKY transcription	WRKY
Cc005687	RNA biosynthesis.transcription factor families.WRKY transcription	WRKY
Cc014618	RNA biosynthesis.transcription factor families.WRKY transcription	WRKY
Cc025008	RNA biosynthesis.transcription factor families.WRKY transcription	WRKY
Cc034942	RNA biosynthesis.transcription factor families.WRKY transcription	WRKY
Cc038904	RNA biosynthesis.transcription factor families.WRKY transcription	WRKY
Cc025049	RNA biosynthesis.transcription factor families.WRKY transcription	WRKY
Cc045586	RNA biosynthesis.transcription factor families.WRKY transcription	WRKY
Cc000580	RNA biosynthesis.transcription factor families.WRKY transcription	WRKY
Cc046886	RNA biosynthesis.transcription factor families.WRKY transcription	WRKY
Cc035220	RNA biosynthesis.transcription factor families.WRKY transcription	WRKY
Cc020668	RNA biosynthesis.transcription factor families.WRKY transcription	WRKY
Cc046477	RNA biosynthesis.transcription factor families.WRKY transcription	WRKY
Cc014455	RNA biosynthesis.transcription factor families.WRKY transcription	WRKY
Cc002500	RNA biosynthesis.transcription factor families.WRKY transcription	WRKY
Cc000048	RNA biosynthesis.transcription factor families.WRKY transcription	WRKY
Cc000028	RNA biosynthesis.transcription factor families.WRKY transcription	WRKY
Cc023467	RNA biosynthesis.transcription factor families.WRKY transcription	WRKY
Cc029121	RNA biosynthesis.transcription factor families.WRKY transcription	WRKY
Cc001358	RNA biosynthesis.transcription factor families.WRKY transcription	WRKY
Cc027537	RNA biosynthesis.transcription factor families.WRKY transcription	WRKY
Cc016864	RNA biosynthesis.transcription factor families.HB (Homeobox)	ZF-HD
Cc012529	RNA biosynthesis.transcription factor families.HB (Homeobox)	ZF-HD
Cc015695	RNA biosynthesis.transcription factor families.HB (Homeobox)	ZF-HD
Cc004510	RNA biosynthesis.transcription factor families.HB (Homeobox)	ZF-HD
Cc021259	RNA biosynthesis.transcription factor families.HB (Homeobox)	ZF-HD
Cc036908	RNA biosynthesis.transcription factor families.HB (Homeobox)	ZF-HD
Cc009320	RNA biosynthesis.transcription factor families.HB (Homeobox)	ZF-HD
Cc046137	RNA biosynthesis.transcription factor families.HB (Homeobox)	ZF-HD
Cc019703	RNA biosynthesis.transcription factor families.HB (Homeobox)	ZF-HD
Cc023767	RNA biosynthesis.transcription factor families.HB (Homeobox)	ZF-HD
Cc014119	RNA biosynthesis.transcription factor families.HB (Homeobox)	ZF-HD
Cc029558	RNA biosynthesis.transcription factor families.HB (Homeobox)	ZF-HD
Cc009162	RNA biosynthesis.transcription factor families.HB (Homeobox)	ZF-HD
* The classification of the families is defined according to PlantTFDB (http://planttfdb.gao-lab.org).
