# Supplementary material for: Regulatory Modules Involved in the Degradation and Modification of Host Cell Walls During Cuscuta campestris Invasion
Source: Front Plant Sci. 2022 Jul 6;13:904313. doi: 10.3389/fpls.2022.904313 (PMC9298654; doi:10.3389/fpls.2022.904313)
Supplement: Supplementary file 3 [file Table_2.XLSX]

## Sheet: Sheet1
Supplemental Table 4. GO enrichment analysis of Cuscuta campestris TF genes that showed higher or lower induction levels in the presence of host plant.
Indent indicates hierarchical relations between over-represented or enriched functional classes.
A. GO terms of biological processes enriched in Cuscuta campestris genes that showed higher induction levels (>2) on Nicotiana tabacum host than on a rod made of non-living material.
GO terms of biological processes	Number of genes	Expected number	Fold enrichment	p-value
response to oxygen-containing compound	13	3.08	4.22	0.0264
response to chemical	18	5.48	3.29	0.0118
response to hormone	14	2.67	5.25	0.000865
response to organic substance	16	3.53	4.53	0.000746
response to endogenous stimulus	14	2.73	5.13	0.00115
cellular developmental process	11	1.52	7.25	0.00089
developmental process	29	6.56	4.42	1.32e-09
tissue development	11	1.4	7.85	0.000408
anatomical structure development	26	6.25	4.16	1.6e-07
phyllome development	11	1.08	10.16	3.15e-05
plant organ development	16	2.27	7.04	1.67e-06
system development	21	4.14	5.07	6.91e-07
multicellular organism development	24	5.4	4.45	3.21e-07
multicellular organismal process	25	6.03	4.15	4.83e-07
shoot system development	16	1.6	10.02	9.94e-09
positive regulation of transcription, DNA-templated	13	1.02	12.71	8.24e-08
positive regulation of nucleic acid-templated transcription	13	1.03	12.66	8.67e-08
positive regulation of RNA biosynthetic process	13	1.03	12.66	8.67e-08
positive regulation of RNA metabolic process	13	1.16	11.16	3.93e-07
regulation of RNA metabolic process	46	4.77	9.64	3.47e-35
regulation of macromolecule metabolic process	47	6.36	7.39	3.9e-31
regulation of metabolic process	47	6.96	6.76	2.25e-29
regulation of biological process	50	11.56	4.33	2.51e-23
biological regulation	51	12.75	4	1.27e-22
regulation of nucleobase-containing compound metabolic process	46	4.93	9.33	1.51e-34
regulation of nitrogen compound metabolic process	47	5.7	8.25	2.75e-33
regulation of cellular metabolic process	47	6.22	7.55	1.45e-31
regulation of cellular process	49	10.07	4.87	8.34e-25
regulation of primary metabolic process	47	5.88	8	1.09e-32
positive regulation of nucleobase-containing compound metabolic process	13	1.2	10.81	5.81e-07
positive regulation of nitrogen compound metabolic process	13	1.53	8.47	1.03e-05
positive regulation of metabolic process	17	1.77	9.59	3.65e-09
positive regulation of biological process	22	2.74	8.03	2.62e-11
positive regulation of cellular metabolic process	16	1.65	9.67	1.68e-08
positive regulation of cellular process	19	2.17	8.74	6.48e-10
positive regulation of macromolecule metabolic process	14	1.59	8.82	1.42e-06
positive regulation of cellular biosynthetic process	15	1.19	12.6	2.21e-09
regulation of cellular biosynthetic process	46	5.18	8.87	1.37e-33
regulation of biosynthetic process	46	5.27	8.74	2.75e-33
positive regulation of biosynthetic process	16	1.23	13.02	2.06e-10
regulation of RNA biosynthetic process	46	4.54	10.14	3.71e-36
regulation of macromolecule biosynthetic process	46	4.97	9.26	2.02e-34
positive regulation of macromolecule biosynthetic process	14	1.11	12.63	1.4e-08
regulation of nucleic acid-templated transcription	46	4.53	10.15	3.56e-36
regulation of transcription, DNA-templated	46	4.53	10.15	3.56e-36
regulation of gene expression	46	5.54	8.31	2.53e-32
regulation of cellular macromolecule biosynthetic process	46	4.94	9.32	1.57e-34
floral whorl development	6	0.43	14.1	0.0143
flower development	12	0.77	15.52	5.63e-08
reproductive shoot system development	12	0.81	14.86	9.16e-08
post-embryonic development	18	3.24	5.56	4.56e-06
reproductive structure development	15	2.63	5.7	0.000104
reproductive system development	15	2.64	5.69	0.000106
developmental process involved in reproduction	15	3.15	4.76	0.00104
reproductive process	17	3.78	4.5	0.00032
reproduction	17	3.8	4.47	0.000347
floral organ development	8	0.53	15.01	0.000211
regulation of cell differentiation	4	0.12	32.1	0.0276
regulation of developmental process	12	1.73	6.94	0.000383
B. GO terms of biological processes enriched in Cuscuta campestris genes that showed lower induction levels (<0.5) on Nicotiana tabacum host than on a rod made of non-living material.
GO terms of biological processes	Number of genes	Expected number	Fold enrichment	p-value
response to light stimulus	12	2.66	4.52	0.0454
response to abiotic stimulus	31	7.63	4.06	2.62e-08
response to stimulus	55	20.25	2.72	7.78e-11
cellular response to oxygen-containing compound	11	1.91	5.77	0.0112
cellular response to chemical stimulus	24	4.12	5.83	7.56e-09
cellular response to stimulus	27	9.59	2.82	0.00168
response to chemical	38	9.37	4.05	4.74e-11
response to oxygen-containing compound	25	5.27	4.74	1.88e-07
response to abscisic acid	10	1.72	5.81	0.03
response to lipid	16	2.9	5.52	0.000107
response to organic substance	27	6.04	4.47	1.02e-07
response to hormone	22	4.56	4.82	2.44e-06
response to endogenous stimulus	22	4.67	4.71	3.76e-06
response to alcohol	10	1.75	5.72	0.034
hormone-mediated signaling pathway	11	1.65	6.68	0.00286
cellular response to hormone stimulus	13	1.9	6.84	0.000211
cellular response to organic substance	16	2.56	6.26	1.94e-05
cellular response to endogenous stimulus	13	2.02	6.44	0.000415
regulation of cellular process	87	17.24	5.05	3.26e-48
regulation of biological process	93	19.79	4.7	2.77e-52
biological regulation	93	21.82	4.26	1.89e-48
regulation of signal transduction	9	1.22	7.37	0.0134
regulation of response to stimulus	19	2.87	6.63	2.4e-07
regulation of cell communication	9	1.25	7.18	0.0165
regulation of signaling	9	1.24	7.24	0.0154
regulation of response to stress	11	1.47	7.46	0.00099
response to organic cyclic compound	8	1.05	7.61	0.0372
cellular response to lipid	9	1.18	7.62	0.0103
leaf development	10	1.25	8.02	0.00184
phyllome development	17	1.85	9.17	2.05e-08
plant organ development	21	3.89	5.4	8.63e-07
anatomical structure development	36	10.7	3.36	6.96e-08
developmental process	39	11.22	3.47	2.48e-09
system development	27	7.09	3.81	3.4e-06
multicellular organism development	32	9.24	3.46	6.61e-07
multicellular organismal process	33	10.32	3.2	2.42e-06
shoot system development	19	2.73	6.95	1.1e-07
defense response to fungus	8	0.96	8.37	0.019
defense response to other organism	13	2.93	4.44	0.0235
response to other organism	16	4.07	3.93	0.009
biological process involved in interspecies interaction between organisms	16	4.12	3.89	0.0104
response to external biotic stimulus	16	4.07	3.93	0.009
response to biotic stimulus	16	4.08	3.93	0.00921
response to external stimulus	18	5.64	3.19	0.0359
response to stress	36	11.74	3.07	9.26e-07
response to fungus	9	1.31	6.87	0.0232
response to water deprivation	12	1.36	8.84	4.61e-05
response to water	12	1.4	8.59	6.31e-05
response to inorganic substance	17	2.71	6.26	6.14e-06
response to acid chemical	12	1.52	7.92	0.000149
response to wounding	8	0.88	9.1	0.0104
negative regulation of response to stimulus	8	0.86	9.26	0.00926
negative regulation of biological process	24	4.05	5.93	5.31e-09
negative regulation of transcription, DNA-templated	9	0.8	11.28	0.000443
negative regulation of cellular macromolecule biosynthetic process	9	1.13	7.95	0.00741
regulation of cellular macromolecule biosynthetic process	84	8.45	9.94	6.44e-69
regulation of macromolecule biosynthetic process	85	8.5	10	1.93e-70
regulation of macromolecule metabolic process	87	10.89	7.99	6.16e-65
regulation of metabolic process	90	11.91	7.56	9.27e-67
regulation of biosynthetic process	86	9.01	9.54	4.53e-70
regulation of cellular biosynthetic process	85	8.87	9.58	6.67e-69
regulation of cellular metabolic process	86	10.65	8.07	4.7e-64
negative regulation of macromolecule biosynthetic process	9	1.14	7.89	0.0078
negative regulation of biosynthetic process	9	1.24	7.28	0.0147
negative regulation of cellular biosynthetic process	9	1.21	7.42	0.0128
negative regulation of cellular metabolic process	10	1.57	6.38	0.0135
negative regulation of cellular process	17	2.61	6.5	3.55e-06
regulation of transcription, DNA-templated	84	7.76	10.82	6.43e-72
regulation of gene expression	86	9.48	9.07	2.91e-68
regulation of nucleic acid-templated transcription	84	7.76	10.82	6.43e-72
regulation of RNA biosynthetic process	84	7.77	10.81	6.94e-72
regulation of RNA metabolic process	84	8.17	10.28	4.08e-70
regulation of nucleobase-containing compound metabolic process	84	8.44	9.95	6e-69
regulation of nitrogen compound metabolic process	85	9.76	8.71	1.59e-65
regulation of primary metabolic process	86	10.06	8.55	4.07e-66
negative regulation of nucleic acid-templated transcription	9	0.81	11.17	0.000477
negative regulation of RNA biosynthetic process	9	0.81	11.17	0.000477
negative regulation of RNA metabolic process	9	0.84	10.69	0.000686
negative regulation of nucleobase-containing compound metabolic process	9	0.94	9.6	0.00164
negative regulation of nitrogen compound metabolic process	9	1.38	6.53	0.0347
positive regulation of transcription, DNA-templated	20	1.75	11.42	4.31e-12
positive regulation of nucleic acid-templated transcription	20	1.76	11.38	4.65e-12
positive regulation of RNA biosynthetic process	20	1.76	11.38	4.65e-12
positive regulation of RNA metabolic process	20	1.99	10.03	4.55e-11
positive regulation of nucleobase-containing compound metabolic process	20	2.06	9.71	8.2e-11
positive regulation of nitrogen compound metabolic process	20	2.63	7.62	6.29e-09
positive regulation of metabolic process	24	3.03	7.91	1.22e-11
positive regulation of biological process	28	4.69	5.97	4.12e-11
positive regulation of cellular metabolic process	23	2.83	8.12	2.91e-11
positive regulation of cellular process	24	3.72	6.45	9.2e-10
positive regulation of macromolecule metabolic process	21	2.72	7.73	1.25e-09
positive regulation of cellular biosynthetic process	23	2.04	11.29	3.12e-14
positive regulation of biosynthetic process	24	2.1	11.41	4.37e-15
positive regulation of macromolecule biosynthetic process	21	1.9	11.07	1.42e-12
negative regulation of developmental process	7	0.57	12.2	0.00684
regulation of developmental process	16	2.96	5.4	0.000143
pattern specification process	9	0.72	12.42	0.000201
regulation of small molecule metabolic process	6	0.46	13.05	0.0257
glucosinolate metabolic process	6	0.42	14.31	0.0155
glycosinolate metabolic process	6	0.42	14.31	0.0155
S-glycoside metabolic process	6	0.42	14.31	0.0155
regulation of secondary metabolic process	5	0.24	20.6	0.0183
carpel development	6	0.29	20.65	0.00206
gynoecium development	6	0.34	17.73	0.00476
floral whorl development	9	0.73	12.36	0.000209
flower development	13	1.32	9.82	3.3e-06
reproductive shoot system development	13	1.38	9.4	5.48e-06
post-embryonic development	20	5.54	3.61	0.00166
reproductive structure development	18	4.51	4	0.00161
reproductive system development	18	4.51	3.99	0.00164
developmental process involved in reproduction	19	5.39	3.52	0.00476
reproductive process	20	6.47	3.09	0.0175
reproduction	20	6.51	3.07	0.019
floral organ development	12	0.91	13.16	6.23e-07
regulation of secondary cell wall biogenesis	4	0.11	37.5	0.0183
regulation of cell wall organization or biogenesis	4	0.13	30.21	0.04
