# Supplementary material for: Regulatory Modules Involved in the Degradation and Modification of Host Cell Walls During Cuscuta campestris Invasion
Source: Front Plant Sci. 2022 Jul 6;13:904313. doi: 10.3389/fpls.2022.904313 (PMC9298654; doi:10.3389/fpls.2022.904313)
Supplement: Supplementary file 4 [file Table_3.XLSX]

## Sheet: cluster1
Supplemental Table 2: List of the TF members in each cluster.
Cluster No.	Gene ID	Description	Family name
1	Cc034258	RNA biosynthesis.transcription factor families.AP2/ERF superfamily.AP2-type	AP2
1	Cc035227	RNA biosynthesis.transcription factor families.AP2/ERF superfamily.ERF-type	AP2
1	Cc010654	RNA biosynthesis.transcription factor families.B3 superfamily.REM	B3
1	Cc018428	RNA biosynthesis.transcription factor families.B3 superfamily.RAV/NGATHA	B3
1	Cc027621	RNA biosynthesis.transcription factor families.BBR/BPC transcription	BBR-BPC
1	Cc008422	Carbohydrate metabolism.starch metabolism.degradation.hydrolysis	BES
1	Cc009911	Carbohydrate metabolism.starch metabolism.degradation.hydrolysis	BES
1	Cc023392	Carbohydrate metabolism.starch metabolism.degradation.hydrolysis	BES
1	Cc012795	RNA biosynthesis.transcription factor families.bHLH transcription	bHLH
1	Cc018279	RNA biosynthesis.transcription factor families.bHLH transcription	bHLH
1	Cc031024	RNA biosynthesis.transcription factor families.bHLH transcription	bHLH
1	Cc041489	RNA biosynthesis.transcription factor families.bHLH transcription	bHLH
1	Cc046410	RNA biosynthesis.transcription factor families.bHLH transcription	bHLH
1	Cc019794	RNA biosynthesis.transcription factor families.bZIP superfamily.bZIP	bZIP
1	Cc031422	RNA biosynthesis.transcription factor families.bZIP superfamily.bZIP	bZIP
1	Cc035566	RNA biosynthesis.transcription factor families.bZIP superfamily.bZIP	bZIP
1	Cc036650	RNA biosynthesis.transcription factor families.bZIP superfamily.bZIP	bZIP
1	Cc002149	RNA processing.RNA 3-end polyadenylation.Cleavage Factor II	C2H2
1	Cc003024	RNA biosynthesis.transcription factor families.C2H2 zinc finger	C2H2
1	Cc005217	RNA biosynthesis.transcription factor families.C2H2 zinc finger	C2H2
1	Cc006025	RNA processing.RNA 3-end polyadenylation.Cleavage Factor II	C2H2
1	Cc006866	RNA biosynthesis.transcription factor families.C2H2 zinc finger	C2H2
1	Cc012228	RNA biosynthesis.transcription factor families.C2H2 zinc finger	C2H2
1	Cc018922	hypothetical protein	C2H2
1	Cc023022	RNA biosynthesis.transcription factor families.C2H2 zinc finger	C2H2
1	Cc024359	RNA biosynthesis.transcription factor families.C2H2 zinc finger	C2H2
1	Cc024578	RNA biosynthesis.transcription factor families.C2H2 zinc finger	C2H2
1	Cc025393	RNA biosynthesis.transcription factor families.C2H2 zinc finger	C2H2
1	Cc028514	RNA biosynthesis.transcription factor families.C2H2 zinc finger	C2H2
1	Cc030772	hypothetical protein	C2H2
1	Cc033162	hypothetical protein	C2H2
1	Cc004993	hypothetical protein	C3H
1	Cc022239	hypothetical protein	C3H
1	Cc035836	RNA biosynthesis.transcription factor families.C3H zinc finger	C3H
1	Cc019974	RNA biosynthesis.transcription factor families.CAMTA transcription	CAMTA
1	Cc044509	RNA biosynthesis.transcription factor families.CAMTA transcription	CAMTA
1	Cc031960	RNA biosynthesis.transcription factor families.CPP1-like transcription	CPP
1	Cc032000	RNA biosynthesis.transcription factor families.CPP1-like transcription	CPP
1	Cc044762	RNA biosynthesis.transcription factor families.CPP1-like transcription	CPP
1	Cc014784	RNA biosynthesis.transcription factor families.C2C2 superfamily.DOF	Dof
1	Cc016866	RNA biosynthesis.transcription factor families.C2C2 superfamily.DOF	Dof
1	Cc000447	RNA biosynthesis.transcription factor families.AP2/ERF superfamily.ERF-type	ERF
1	Cc001332	RNA biosynthesis.transcription factor families.AP2/ERF superfamily.DREB-type	ERF
1	Cc001374	RNA biosynthesis.transcription factor families.AP2/ERF superfamily.ERF-type	ERF
1	Cc001703	RNA biosynthesis.transcription factor families.AP2/ERF superfamily.ERF-type	ERF
1	Cc004845	RNA biosynthesis.transcription factor families.AP2/ERF superfamily.ERF-type	ERF
1	Cc018346	RNA biosynthesis.transcription factor families.AP2/ERF superfamily.DREB-type	ERF
1	Cc019039	RNA biosynthesis.transcription factor families.AP2/ERF superfamily.ERF-type	ERF
1	Cc019908	RNA biosynthesis.transcription factor families.AP2/ERF superfamily.ERF-type	ERF
1	Cc023819	RNA biosynthesis.transcription factor families.AP2/ERF superfamily.ERF-type	ERF
1	Cc027763	RNA biosynthesis.transcription factor families.AP2/ERF superfamily.ERF-type	ERF
1	Cc031648	RNA biosynthesis.transcription factor families.AP2/ERF superfamily.ERF-type	ERF
1	Cc038786	RNA biosynthesis.transcription factor families.AP2/ERF superfamily.DREB-type	ERF
1	Cc038789	RNA biosynthesis.transcription factor families.AP2/ERF superfamily.DREB-type	ERF
1	Cc044436	RNA biosynthesis.transcription factor families.AP2/ERF superfamily.ERF-type	ERF
1	Cc046871	RNA biosynthesis.transcription factor families.AP2/ERF superfamily.ERF-type	ERF
1	Cc046907	RNA biosynthesis.transcription factor families.AP2/ERF superfamily.DREB-type	ERF
1	Cc047189	RNA biosynthesis.transcription factor families.AP2/ERF superfamily.DREB-type	ERF
1	Cc004725	RNA biosynthesis.transcription factor families.FAR1 transcription	FAR1
1	Cc013711	RNA biosynthesis.transcription factor families.FAR1 transcription	FAR1
1	Cc005269	Amino acid metabolism.biosynthesis.glutamate family.glutamate-derived	G2-like
1	Cc013250	Multi-process regulatory mechanisms.circadian clock.evening	G2-like
1	Cc028274	RNA biosynthesis.transcription factor families.C2C2 superfamily.GATA	GATA
1	Cc013797	RNA biosynthesis.transcription factor families.GRAS transcription	GRAS
1	Cc017415	RNA biosynthesis.transcription factor families.GRAS transcription	GRAS
1	Cc030894	RNA biosynthesis.transcription factor families.HB (Homeobox)	HD-ZIP
1	Cc004047	RNA biosynthesis.transcription factor families.HSF (heat shock)	HSF
1	Cc012689	RNA biosynthesis.transcription factor families.HSF (heat shock)	HSF
1	Cc015631	RNA biosynthesis.transcription factor families.HSF (heat shock)	HSF
1	Cc000348	Lipid metabolism.lipid bodies-associated activities.oleosin	LBD
1	Cc013904	RNA biosynthesis.transcription factor families.AS2/LOB transcription	LBD
1	Cc019141	RNA biosynthesis.transcription factor families.AS2/LOB transcription	LBD
1	Cc035972	RNA biosynthesis.transcription factor families.AS2/LOB transcription	LBD
1	Cc006271	RNA biosynthesis.transcription factor families.MADS box transcription	MIKC_MADS
1	Cc004853	RNA biosynthesis.transcription factor families.MYB superfamily.MYB	MYB
1	Cc007050	RNA biosynthesis.transcription factor families.MYB superfamily.MYB	MYB
1	Cc010365	RNA biosynthesis.transcription factor families.MYB superfamily.MYB-related	MYB
1	Cc014899	RNA biosynthesis.transcription factor families.MYB superfamily.MYB	MYB
1	Cc028172	RNA biosynthesis.transcription factor families.MYB superfamily.MYB	MYB
1	Cc031654	RNA biosynthesis.transcription factor families.MYB superfamily.MYB	MYB
1	Cc041060	RNA biosynthesis.transcription factor families.MYB superfamily.MYB	MYB
1	Cc043219	RNA biosynthesis.transcription factor families.MYB superfamily.MYB	MYB
1	Cc001659	RNA biosynthesis.transcription factor families.MYB superfamily.MYB-related	MYB-related
1	Cc006359	RNA biosynthesis.transcription factor families.MYB superfamily.MYB-related	MYB-related
1	Cc008304	RNA biosynthesis.transcription factor families.MYB superfamily.MYB	MYB-related
1	Cc009689	RNA biosynthesis.transcription factor families.MYB superfamily.MYB-related	MYB-related
1	Cc023193	RNA biosynthesis.transcription factor families.MYB superfamily.MYB-related	MYB-related
1	Cc024590	RNA biosynthesis.transcription factor families.MYB superfamily.MYB	MYB-related
1	Cc026812	RNA biosynthesis.transcription factor families.MYB superfamily.MYB	MYB-related
1	Cc032303	RNA biosynthesis.transcription factor families.MYB superfamily.MYB	MYB-related
1	Cc038650	RNA biosynthesis.transcription factor families.MYB superfamily.MYB	MYB-related
1	Cc044820	RNA biosynthesis.transcription factor families.MYB superfamily.MYB-related	MYB-related
1	Cc046997	RNA biosynthesis.transcription factor families.MYB superfamily.MYB-related	MYB-related
1	Cc000010	RNA biosynthesis.transcription factor families.NAC transcription	NAC
1	Cc000288	RNA biosynthesis.transcription factor families.NAC transcription	NAC
1	Cc005252	RNA biosynthesis.transcription factor families.NAC transcription	NAC
1	Cc008390	RNA biosynthesis.transcription factor families.NAC transcription	NAC
1	Cc008640	RNA biosynthesis.transcription factor families.NAC transcription	NAC
1	Cc009879	RNA biosynthesis.transcription factor families.NAC transcription	NAC
1	Cc011447	RNA biosynthesis.transcription factor families.NAC transcription	NAC
1	Cc011450	hypothetical protein	NAC
1	Cc013930	RNA biosynthesis.transcription factor families.NAC transcription	NAC
1	Cc014846	RNA biosynthesis.transcription factor families.NAC transcription	NAC
1	Cc015350	RNA biosynthesis.transcription factor families.NAC transcription	NAC
1	Cc016299	RNA biosynthesis.transcription factor families.NAC transcription	NAC
1	Cc017122	RNA biosynthesis.transcription factor families.NAC transcription	NAC
1	Cc018306	RNA biosynthesis.transcription factor families.NAC transcription	NAC
1	Cc019206	RNA biosynthesis.transcription factor families.NAC transcription	NAC
1	Cc022030	RNA biosynthesis.transcription factor families.NAC transcription	NAC
1	Cc033872	RNA biosynthesis.transcription factor families.NAC transcription	NAC
1	Cc044877	RNA biosynthesis.transcription factor families.NAC transcription	NAC
1	Cc047094	RNA biosynthesis.transcription factor families.NAC transcription	NAC
1	Cc001760	RNA biosynthesis.transcription factor families.SRS transcription	SRS
1	Cc014138	RNA biosynthesis.transcription factor families.SRS transcription	SRS
1	Cc021735	RNA biosynthesis.transcription factor families.SRS transcription	SRS
1	Cc034492	RNA biosynthesis.transcription factor families.SRS transcription	SRS
1	Cc047530	RNA biosynthesis.transcription factor families.SRS transcription	SRS
1	Cc017839	RNA biosynthesis.transcription factor families.HB (Homeobox)	TALE
1	Cc030244	RNA biosynthesis.transcription factor families.HB (Homeobox)	TALE
1	Cc002594	hypothetical protein	Trihelix
1	Cc004266	RNA biosynthesis.transcription factor families.Trihelix transcription	Trihelix
1	Cc005890	RNA biosynthesis.transcription factor families.Trihelix transcription	Trihelix
1	Cc009084	RNA biosynthesis.transcription factor families.Trihelix transcription	Trihelix
1	Cc012699	RNA biosynthesis.transcription factor families.Trihelix transcription	Trihelix
1	Cc013097	RNA biosynthesis.transcription factor families.Trihelix transcription	Trihelix
1	Cc014545	hypothetical protein	Trihelix
1	Cc019920	hypothetical protein	Trihelix
1	Cc022225	RNA biosynthesis.transcription factor families.Trihelix transcription	Trihelix
1	Cc036643	hypothetical protein	Trihelix
1	Cc041382	RNA biosynthesis.transcription factor families.Trihelix transcription	Trihelix
1	Cc044454	hypothetical protein	Trihelix
1	Cc000028	RNA biosynthesis.transcription factor families.WRKY transcription	WRKY
1	Cc002754	RNA biosynthesis.transcription factor families.WRKY transcription	WRKY
1	Cc003296	RNA biosynthesis.transcription factor families.WRKY transcription	WRKY
1	Cc004070	RNA biosynthesis.transcription factor families.WRKY transcription	WRKY
1	Cc014455	RNA biosynthesis.transcription factor families.WRKY transcription	WRKY
1	Cc015170	RNA biosynthesis.transcription factor families.WRKY transcription	WRKY
1	Cc019215	RNA biosynthesis.transcription factor families.WRKY transcription	WRKY
1	Cc019959	RNA biosynthesis.transcription factor families.WRKY transcription	WRKY
1	Cc020050	RNA biosynthesis.transcription factor families.WRKY transcription	WRKY
1	Cc020704	RNA biosynthesis.transcription factor families.WRKY transcription	WRKY
1	Cc020891	RNA biosynthesis.transcription factor families.WRKY transcription	WRKY
1	Cc021184	RNA biosynthesis.transcription factor families.WRKY transcription	WRKY
1	Cc022962	RNA biosynthesis.transcription factor families.WRKY transcription	WRKY
1	Cc023467	RNA biosynthesis.transcription factor families.WRKY transcription	WRKY
1	Cc025008	RNA biosynthesis.transcription factor families.WRKY transcription	WRKY
1	Cc027310	RNA biosynthesis.transcription factor families.WRKY transcription	WRKY
1	Cc029121	RNA biosynthesis.transcription factor families.WRKY transcription	WRKY
1	Cc034835	RNA biosynthesis.transcription factor families.WRKY transcription	WRKY
1	Cc035220	RNA biosynthesis.transcription factor families.WRKY transcription	WRKY
1	Cc038904	RNA biosynthesis.transcription factor families.WRKY transcription	WRKY
1	Cc044015	RNA biosynthesis.transcription factor families.WRKY transcription	WRKY
1	Cc044495	RNA biosynthesis.transcription factor families.WRKY transcription	WRKY
1	Cc044579	RNA biosynthesis.transcription factor families.WRKY transcription	WRKY
1	Cc045131	RNA biosynthesis.transcription factor families.WRKY transcription	WRKY
1	Cc029558	RNA biosynthesis.transcription factor families.HB (Homeobox)	ZF-HD

## Sheet: cluster2
Cluster No.	Gene ID	Description	Family name
2	Cc009308	RNA biosynthesis.transcription factor families.AP2/ERF superfamily.AP2-type	AP2
2	Cc021893	RNA biosynthesis.transcription factor families.AP2/ERF superfamily.AP2-type	AP2
2	Cc046124	RNA biosynthesis.transcription factor families.AP2/ERF superfamily.AP2-type	AP2
2	Cc000630	hypothetical protein	BES
2	Cc030545	hypothetical protein	BES
2	Cc011171	RNA biosynthesis.transcription factor families.bHLH transcription	bHLH
2	Cc020413	RNA biosynthesis.transcription factor families.bHLH transcription	bHLH
2	Cc023689	Protein biosynthesis.aminoacyl-tRNA synthetase activities.glutamine-tRNA	bHLH
2	Cc032598	Protein biosynthesis.cytosolic ribosome.large subunit (LSU).LSU	bHLH
2	Cc041457	Protein biosynthesis.cytosolic ribosome.large subunit (LSU).LSU	bHLH
2	Cc043982	RNA biosynthesis.transcription factor families.bHLH transcription	bHLH
2	Cc023019	RNA biosynthesis.transcription factor families.bZIP superfamily.bZIP	bZIP
2	Cc028286	RNA biosynthesis.transcription factor families.bZIP superfamily.bZIP	bZIP
2	Cc000726	Lipid metabolism.glycerolipid synthesis.phosphatidylglycerol.CDP-diacylglycerol	C2H2
2	Cc011280	RNA biosynthesis.transcription factor families.C2H2 zinc finger	C2H2
2	Cc046154	RNA biosynthesis.transcription factor families.C2H2 zinc finger	C2H2
2	Cc000493	RNA biosynthesis.transcription factor families.C3H zinc finger	C3H
2	Cc011347	RNA biosynthesis.transcription factor families.C3H zinc finger	C3H
2	Cc018989	RNA biosynthesis.transcription factor families.C3H zinc finger	C3H
2	Cc040061	RNA biosynthesis.transcription factor families.C3H zinc finger	C3H
2	Cc040062	RNA biosynthesis.transcription factor families.C3H zinc finger	C3H
2	Cc047177	RNA biosynthesis.transcription factor families.C3H zinc finger	C3H
2	Cc047271	RNA biosynthesis.transcription factor families.C3H zinc finger	C3H
2	Cc027047	RNA biosynthesis.transcription factor families.CPP1-like transcription	CPP
2	Cc006698	RNA biosynthesis.transcription factor families.AP2/ERF superfamily.ERF-type	ERF
2	Cc006988	RNA biosynthesis.transcription factor families.AP2/ERF superfamily.ERF-type	ERF
2	Cc024049	hypothetical protein	ERF
2	Cc026112	RNA biosynthesis.transcription factor families.AP2/ERF superfamily.DREB-type	ERF
2	Cc027208	RNA biosynthesis.transcription factor families.AP2/ERF superfamily.ERF-type	ERF
2	Cc037238	RNA biosynthesis.transcription factor families.AP2/ERF superfamily.DREB-type	ERF
2	Cc037250	RNA biosynthesis.transcription factor families.AP2/ERF superfamily.DREB-type	ERF
2	Cc027657	RNA biosynthesis.transcription factor families.FAR1 transcription	FAR1
2	Cc004347	RNA biosynthesis.transcription factor families.C2C2 superfamily.GATA	GATA
2	Cc023877	RNA biosynthesis.transcription factor families.C2C2 superfamily.GATA	GATA
2	Cc002393	RNA biosynthesis.transcription factor families.GRAS transcription	GRAS
2	Cc014346	RNA biosynthesis.transcription factor families.GRAS transcription	GRAS
2	Cc022128	RNA biosynthesis.transcription factor families.GRF-GIF transcriptional	GRF
2	Cc003611	RNA biosynthesis.transcription factor families.HB (Homeobox)	HD-ZIP
2	Cc045722	RNA biosynthesis.transcription factor families.HRT transcription	HRT-like
2	Cc008201	RNA biosynthesis.transcription factor families.AS2/LOB transcription	LBD
2	Cc013133	RNA biosynthesis.transcription factor families.AS2/LOB transcription	LBD
2	Cc017015	RNA biosynthesis.transcription factor families.AS2/LOB transcription	LBD
2	Cc019494	RNA biosynthesis.transcription factor families.AS2/LOB transcription	LBD
2	Cc036239	RNA biosynthesis.transcription factor families.AS2/LOB transcription	LBD
2	Cc020596	RNA biosynthesis.transcription factor families.MYB superfamily.MYB	MYB
2	Cc024830	RNA biosynthesis.transcription factor families.MYB superfamily.MYB	MYB
2	Cc008129	RNA biosynthesis.transcription factor families.MYB superfamily.MYB-related	MYB-related
2	Cc012479	RNA biosynthesis.transcription factor families.MYB superfamily.MYB	MYB-related
2	Cc014485	RNA biosynthesis.transcription factor families.MYB superfamily.MYB-related	MYB-related
2	Cc016511	RNA biosynthesis.transcription factor families.MYB superfamily.MYB-related	MYB-related
2	Cc022314	RNA biosynthesis.transcription factor families.MYB superfamily.MYB	MYB-related
2	Cc025193	RNA biosynthesis.transcription factor families.MYB superfamily.MYB-related	MYB-related
2	Cc028426	RNA biosynthesis.transcription factor families.MYB superfamily.MYB-related	MYB-related
2	Cc008537	RNA biosynthesis.transcription factor families.NAC transcription	NAC
2	Cc008641	RNA biosynthesis.transcription factor families.NAC transcription	NAC
2	Cc011177	RNA biosynthesis.RNA polymerase II-dependent transcription.pre-initiation	NF-YC
2	Cc020693	RNA biosynthesis.transcription factor families.NF-Y transcription	NF-YC
2	Cc044512	RNA biosynthesis.transcription factor families.SBP transcription	SBP
2	Cc023874	RNA biosynthesis.transcription factor families.SRS transcription	SRS
2	Cc035099	RNA biosynthesis.transcription factor families.SRS transcription	SRS
2	Cc024997	RNA biosynthesis.transcription factor families.HB (Homeobox)	TALE
2	Cc045648	RNA biosynthesis.transcription factor families.HB (Homeobox)	TALE
2	Cc012114	RNA biosynthesis.transcription factor families.WRKY transcription	WRKY
2	Cc012129	RNA biosynthesis.transcription factor families.WRKY transcription	WRKY
2	Cc017133	RNA biosynthesis.transcription factor families.WRKY transcription	WRKY
2	Cc041664	RNA biosynthesis.transcription factor families.WRKY transcription	WRKY

## Sheet: cluster3
Cluster No.	Gene ID	Description	Family name
3	Cc003817	RNA biosynthesis.transcription factor families.AP2/ERF superfamily.AP2-type	AP2
3	Cc018199	RNA biosynthesis.transcription factor families.AP2/ERF superfamily.ERF-type	AP2
3	Cc023216	RNA biosynthesis.transcription factor families.AP2/ERF superfamily.AP2-type	AP2
3	Cc015843	Phytohormones.cytokinin.perception and signal transduction.B-type	ARR-B
3	Cc023624	Phytohormones.cytokinin.perception and signal transduction.B-type	ARR-B
3	Cc024708	Phytohormones.cytokinin.perception and signal transduction.B-type	ARR-B
3	Cc029357	Phytohormones.cytokinin.perception and signal transduction.B-type	ARR-B
3	Cc006642	RNA biosynthesis.transcription factor families.B3 superfamily.LAV-VAL	B3
3	Cc007033	RNA biosynthesis.transcription factor families.B3 superfamily.LAV-VAL	B3
3	Cc009638	RNA biosynthesis.transcription factor families.B3 superfamily.REM	B3
3	Cc013340	RNA biosynthesis.transcription factor families.B3 superfamily.RAV/NGATHA	B3
3	Cc026808	RNA biosynthesis.transcription factor families.B3 superfamily.REM	B3
3	Cc034839	RNA biosynthesis.transcription factor families.B3 superfamily.LAV-VAL	B3
3	Cc047344	RNA biosynthesis.transcription factor families.B3 superfamily.REM	B3
3	Cc035107	RNA biosynthesis.transcription factor families.BBR/BPC transcription	BBR-BPC
3	Cc047546	RNA biosynthesis.transcription factor families.BBR/BPC transcription	BBR-BPC
3	Cc023750	Phytohormones.brassinosteroid.perception and signal transduction.BES/BZR-type	BES
3	Cc005530	RNA biosynthesis.transcription factor families.bHLH transcription	bHLH
3	Cc014581	RNA biosynthesis.transcription factor families.bHLH transcription	bHLH
3	Cc026915	RNA biosynthesis.transcription factor families.bHLH transcription	bHLH
3	Cc027422	RNA biosynthesis.transcription factor families.bHLH transcription	bHLH
3	Cc032297	RNA biosynthesis.transcription factor families.bHLH transcription	bHLH
3	Cc038986	RNA biosynthesis.transcription factor families.bHLH transcription	bHLH
3	Cc045995	RNA biosynthesis.transcription factor families.bHLH transcription	bHLH
3	Cc002951	RNA biosynthesis.transcription factor families.bZIP superfamily.bZIP	bZIP
3	Cc009995	RNA biosynthesis.transcription factor families.bZIP superfamily.bZIP	bZIP
3	Cc024318	RNA biosynthesis.transcription factor families.bZIP superfamily.bZIP	bZIP
3	Cc045079	RNA biosynthesis.transcription factor families.bZIP superfamily.bZIP	bZIP
3	Cc047591	RNA biosynthesis.transcription factor families.bZIP superfamily.bZIP	bZIP
3	Cc001668	RNA biosynthesis.transcription factor families.C2H2 zinc finger	C2H2
3	Cc007983	RNA biosynthesis.RNA polymerase III-dependent transcription.TFIIIa	C2H2
3	Cc023780	RNA biosynthesis.transcription factor families.C2H2 zinc finger	C2H2
3	Cc024073	RNA biosynthesis.transcription factor families.C2H2 zinc finger	C2H2
3	Cc025682	RNA biosynthesis.RNA polymerase III-dependent transcription.TFIIIc	C2H2
3	Cc014765	hypothetical protein	C3H
3	Cc017494	RNA biosynthesis.transcription factor families.C3H zinc finger	C3H
3	Cc023423	RNA biosynthesis.transcription factor families.C3H zinc finger	C3H
3	Cc032279	RNA biosynthesis.transcription factor families.C3H zinc finger	C3H
3	Cc034481	hypothetical protein	C3H
3	Cc047541	hypothetical protein	C3H
3	Cc001974	RNA biosynthesis.transcription factor families.C2C2 superfamily.BBX/DBB	DBB
3	Cc046173	Phytohormones.ethylene.perception and signal transduction.EIN3-type	EIL
3	Cc000755	RNA biosynthesis.transcription factor families.AP2/ERF superfamily.DREB-type	ERF
3	Cc005691	RNA biosynthesis.transcription factor families.AP2/ERF superfamily.DREB-type	ERF
3	Cc011337	RNA biosynthesis.transcription factor families.AP2/ERF superfamily.DREB-type	ERF
3	Cc014038	RNA biosynthesis.transcription factor families.AP2/ERF superfamily.DREB-type	ERF
3	Cc014498	RNA biosynthesis.transcription factor families.AP2/ERF superfamily.ERF-type	ERF
3	Cc020723	RNA biosynthesis.transcription factor families.AP2/ERF superfamily.ERF-type	ERF
3	Cc023691	RNA biosynthesis.transcription factor families.AP2/ERF superfamily.DREB-type	ERF
3	Cc025053	RNA biosynthesis.transcription factor families.AP2/ERF superfamily.DREB-type	ERF
3	Cc032653	RNA biosynthesis.transcription factor families.AP2/ERF superfamily.DREB-type	ERF
3	Cc044018	RNA biosynthesis.transcription factor families.AP2/ERF superfamily.DREB-type	ERF
3	Cc010115	RNA biosynthesis.transcription factor families.FAR1 transcription	FAR1
3	Cc027815	RNA biosynthesis.transcription factor families.FAR1 transcription	FAR1
3	Cc044240	RNA biosynthesis.transcription factor families.FAR1 transcription	FAR1
3	Cc044704	RNA biosynthesis.transcription factor families.FAR1 transcription	FAR1
3	Cc008118	Multi-process regulatory mechanisms.circadian clock.evening	G2-like
3	Cc003000	RNA biosynthesis.transcription factor families.C2C2 superfamily.GATA	GATA
3	Cc012270	RNA biosynthesis.transcription factor families.C2C2 superfamily.GATA	GATA
3	Cc025426	RNA biosynthesis.transcription factor families.C2C2 superfamily.GATA	GATA
3	Cc004497	RNA biosynthesis.transcription factor families.GRAS transcription	GRAS
3	Cc013242	RNA biosynthesis.transcription factor families.GRAS transcription	GRAS
3	Cc019714	RNA biosynthesis.transcription factor families.GRAS transcription	GRAS
3	Cc016721	RNA biosynthesis.transcription factor families.HB (Homeobox)	HB-other
3	Cc020366	RNA biosynthesis.transcription factor families.HB (Homeobox)	HB-other
3	Cc020370	RNA biosynthesis.transcription factor families.HB (Homeobox)	HB-other
3	Cc006046	RNA biosynthesis.transcription factor families.HB (Homeobox)	HD-ZIP
3	Cc020260	RNA biosynthesis.transcription factor families.HB (Homeobox)	HD-ZIP
3	Cc026585	RNA biosynthesis.transcription factor families.HB (Homeobox)	HD-ZIP
3	Cc001429	RNA biosynthesis.transcription factor families.HSF (heat shock)	HSF
3	Cc017210	RNA biosynthesis.transcription factor families.HSF (heat shock)	HSF
3	Cc021316	RNA biosynthesis.transcription factor families.HSF (heat shock)	HSF
3	Cc022259	RNA biosynthesis.transcription factor families.HSF (heat shock)	HSF
3	Cc023427	RNA biosynthesis.transcription factor families.HSF (heat shock)	HSF
3	Cc045740	RNA biosynthesis.transcription factor families.HSF (heat shock)	HSF
3	Cc046818	RNA biosynthesis.transcription factor families.HSF (heat shock)	HSF
3	Cc004540	RNA biosynthesis.transcription factor families.MADS box transcription	M-type_MADS
3	Cc019671	RNA biosynthesis.transcription factor families.MADS box transcription	M-type_MADS
3	Cc022369	RNA biosynthesis.transcription factor families.MYB superfamily.MYB-related	MYB
3	Cc023188	RNA biosynthesis.transcription factor families.MYB superfamily.MYB	MYB
3	Cc002816	RNA biosynthesis.transcription factor families.MYB superfamily.MYB-related	MYB-related
3	Cc010583	RNA biosynthesis.RNA polymerase I-dependent transcription.TTF1	MYB-related
3	Cc011004	RNA biosynthesis.RNA polymerase I-dependent transcription.TTF1	MYB-related
3	Cc022402	RNA biosynthesis.transcription factor families.MYB superfamily.MYB-related	MYB-related
3	Cc030305	RNA biosynthesis.transcription factor families.MYB superfamily.MYB-related	MYB-related
3	Cc030994	RNA biosynthesis.transcription factor families.MYB superfamily.MYB-related	MYB-related
3	Cc034625	RNA biosynthesis.transcription factor families.MYB superfamily.MYB-related	MYB-related
3	Cc046090	Phytohormones.cytokinin.synthesis.cytokinin phosphoribohydrolase	MYB-related
3	Cc005492	RNA biosynthesis.transcription factor families.NAC transcription	NAC
3	Cc022118	RNA biosynthesis.transcription factor families.NAC transcription	NAC
3	Cc046698	RNA biosynthesis.transcription factor families.NAC transcription	NAC
3	Cc046929	hypothetical protein	NF-X1
3	Cc007551	RNA biosynthesis.transcription factor families.SBP transcription	SBP
3	Cc010142	RNA biosynthesis.transcription factor families.SBP transcription	SBP
3	Cc018151	RNA biosynthesis.transcription factor families.SBP transcription	SBP
3	Cc020008	RNA biosynthesis.transcription factor families.SBP transcription	SBP
3	Cc029926	RNA biosynthesis.transcription factor families.SBP transcription	SBP
3	Cc039191	RNA biosynthesis.transcription factor families.SBP transcription	SBP
3	Cc041719	RNA biosynthesis.transcription factor families.SBP transcription	SBP
3	Cc044540	RNA biosynthesis.transcription factor families.SBP transcription	SBP
3	Cc007581	RNA biosynthesis.transcription factor families.TCP transcription	TCP
3	Cc010168	RNA biosynthesis.transcription factor families.TCP transcription	TCP
3	Cc019334	RNA biosynthesis.transcription factor families.TCP transcription	TCP
3	Cc004974	RNA biosynthesis.transcription factor families.Trihelix transcription	Trihelix
3	Cc005549	hypothetical protein	Trihelix
3	Cc021587	RNA biosynthesis.transcription factor families.Trihelix transcription	Trihelix
3	Cc045374	RNA biosynthesis.transcription factor families.Trihelix transcription	Trihelix
3	Cc000278	RNA biosynthesis.transcription factor families.WRKY transcription	WRKY
3	Cc045586	RNA biosynthesis.transcription factor families.WRKY transcription	WRKY
3	Cc019703	RNA biosynthesis.transcription factor families.HB (Homeobox)	ZF-HD

## Sheet: cluster4
Cluster No.	Gene ID	Description	Family name
4	Cc001475	RNA biosynthesis.transcription factor families.AP2/ERF superfamily.ERF-type	AP2
4	Cc004118	RNA biosynthesis.transcription factor families.AP2/ERF superfamily.AP2-type	AP2
4	Cc020936	RNA biosynthesis.transcription factor families.AP2/ERF superfamily.AP2-type	AP2
4	Cc025997	RNA biosynthesis.transcription factor families.AP2/ERF superfamily.AP2-type	AP2
4	Cc046773	RNA biosynthesis.transcription factor families.AP2/ERF superfamily.ERF-type	AP2
4	Cc001204	Phytohormones.cytokinin.perception and signal transduction.B-type	ARR-B
4	Cc001773	RNA biosynthesis.transcription factor families.BBR/BPC transcription	BBR-BPC
4	Cc000693	Protein biosynthesis.cytosolic ribosome.large subunit (LSU).LSU	bHLH
4	Cc001589	RNA biosynthesis.transcription factor families.bHLH transcription	bHLH
4	Cc007259	RNA biosynthesis.transcription factor families.bHLH transcription	bHLH
4	Cc008359	RNA biosynthesis.transcription factor families.bHLH transcription	bHLH
4	Cc009839	RNA biosynthesis.transcription factor families.bHLH transcription	bHLH
4	Cc014036	Protein biosynthesis.aminoacyl-tRNA synthetase activities.glutamine-tRNA	bHLH
4	Cc044029	RNA biosynthesis.transcription factor families.bHLH transcription	bHLH
4	Cc045047	RNA biosynthesis.transcription factor families.bHLH transcription	bHLH
4	Cc023885	RNA biosynthesis.transcription factor families.bZIP superfamily.bZIP	bZIP
4	Cc002254	RNA biosynthesis.transcription factor families.C3H zinc finger	C3H
4	Cc030040	RNA biosynthesis.transcription factor families.C3H zinc finger	C3H
4	Cc030106	RNA processing.RNA modification.dihydrouridylation.tRNA dihydrouridine	C3H
4	Cc031041	RNA biosynthesis.transcription factor families.C3H zinc finger	C3H
4	Cc033400	RNA biosynthesis.transcription factor families.C3H zinc finger	C3H
4	Cc036276	RNA processing.RNA modification.dihydrouridylation.tRNA dihydrouridine	C3H
4	Cc036607	RNA biosynthesis.transcription factor families.C3H zinc finger	C3H
4	Cc040429	RNA biosynthesis.transcription factor families.C3H zinc finger	C3H
4	Cc038716	RNA biosynthesis.transcription factor families.C2C2 superfamily.BBX/CONSTANS	CO-like
4	Cc002037	RNA biosynthesis.transcription factor families.AP2/ERF superfamily.DREB-type	ERF
4	Cc007297	RNA biosynthesis.transcription factor families.AP2/ERF superfamily.ERF-type	ERF
4	Cc012621	RNA biosynthesis.transcription factor families.AP2/ERF superfamily.DREB-type	ERF
4	Cc018735	RNA biosynthesis.transcription factor families.AP2/ERF superfamily.ERF-type	ERF
4	Cc021751	RNA biosynthesis.transcription factor families.AP2/ERF superfamily.DREB-type	ERF
4	Cc031070	RNA biosynthesis.transcription factor families.AP2/ERF superfamily.ERF-type	ERF
4	Cc031203	RNA biosynthesis.transcription factor families.FAR1 transcription	FAR1
4	Cc029242	RNA biosynthesis.transcription factor families.MYB superfamily.G2-like	G2-like
4	Cc001678	RNA biosynthesis.transcription factor families.HB (Homeobox)	HB-PHD
4	Cc023793	RNA biosynthesis.transcription factor families.HB (Homeobox)	HB-PHD
4	Cc001427	RNA biosynthesis.transcription factor families.HB (Homeobox)	HD-ZIP
4	Cc012964	RNA biosynthesis.transcription factor families.HB (Homeobox)	HD-ZIP
4	Cc046820	RNA biosynthesis.transcription factor families.HB (Homeobox)	HD-ZIP
4	Cc027822	RNA biosynthesis.transcription factor families.AS2/LOB transcription	LBD
4	Cc027883	RNA biosynthesis.transcription factor families.LFY transcription	LFY
4	Cc002739	RNA biosynthesis.transcription factor families.MADS box transcription	MIKC_MADS
4	Cc031699	RNA biosynthesis.transcription factor families.MADS box transcription	MIKC_MADS
4	Cc010348	RNA biosynthesis.transcription factor families.MYB superfamily.MYB	MYB
4	Cc013277	RNA biosynthesis.transcription factor families.MYB superfamily.MYB	MYB
4	Cc014405	RNA biosynthesis.transcription factor families.MYB superfamily.MYB	MYB
4	Cc021646	hypothetical protein	MYB
4	Cc022579	RNA biosynthesis.transcription factor families.MYB superfamily.MYB	MYB
4	Cc028816	RNA biosynthesis.transcription factor families.MYB superfamily.MYB-related	MYB
4	Cc030490	RNA biosynthesis.transcription factor families.MYB superfamily.MYB	MYB
4	Cc046563	RNA biosynthesis.transcription factor families.MYB superfamily.MYB-related	MYB
4	Cc000859	RNA biosynthesis.transcription factor families.MYB superfamily.MYB-related	MYB-related
4	Cc002657	RNA biosynthesis.transcription factor families.MYB superfamily.MYB	MYB-related
4	Cc010440	RNA biosynthesis.transcription factor families.MYB superfamily.MYB-related	MYB-related
4	Cc012243	RNA biosynthesis.transcription factor families.MYB superfamily.MYB	MYB-related
4	Cc012558	Protein modification.protein folding and quality control.RAC	MYB-related
4	Cc018566	RNA biosynthesis.transcription factor families.NAC transcription	NAC
4	Cc023451	RNA biosynthesis.transcription factor families.NAC transcription	NAC
4	Cc028255	RNA biosynthesis.transcription factor families.NAC transcription	NAC
4	Cc030154	RNA biosynthesis.transcription factor families.NAC transcription	NAC
4	Cc013414	RNA biosynthesis.transcription factor families.NF-Y transcription	NF-YA
4	Cc009361	RNA biosynthesis.transcription factor families.SAP transcription	SAP
4	Cc015262	RNA biosynthesis.transcription factor families.SAP transcription	SAP
4	Cc045103	RNA biosynthesis.transcription factor families.SBP transcription	SBP
4	Cc033347	RNA biosynthesis.transcription factor families.HB (Homeobox)	TALE
4	Cc024188	RNA biosynthesis.transcription factor families.Trihelix transcription	Trihelix
4	Cc038363	RNA biosynthesis.transcription factor families.Trihelix transcription	Trihelix
4	Cc000580	RNA biosynthesis.transcription factor families.WRKY transcription	WRKY
4	Cc002879	RNA biosynthesis.transcription factor families.WRKY transcription	WRKY
4	Cc006426	RNA biosynthesis.transcription factor families.WRKY transcription	WRKY
4	Cc027157	RNA biosynthesis.transcription factor families.WRKY transcription	WRKY
4	Cc004510	RNA biosynthesis.transcription factor families.HB (Homeobox)	ZF-HD
4	Cc015695	RNA biosynthesis.transcription factor families.HB (Homeobox)	ZF-HD
4	Cc021259	RNA biosynthesis.transcription factor families.HB (Homeobox)	ZF-HD
4	Cc046137	RNA biosynthesis.transcription factor families.HB (Homeobox)	ZF-HD

## Sheet: cluster5
Cluster No.	Gene ID	Description	Family name
5	Cc000285	RNA biosynthesis.transcription factor families.MYB superfamily.MYB	MYB
5	Cc000589	RNA biosynthesis.transcription factor families.bZIP superfamily.bZIP	bZIP
5	Cc000690	RNA biosynthesis.transcription factor families.HB (Homeobox)	HD-ZIP
5	Cc000934	RNA biosynthesis.transcription factor families.MYB superfamily.MYB	MYB
5	Cc001121	RNA biosynthesis.transcription factor families.AS2/LOB transcription	LBD
5	Cc001329	RNA biosynthesis.transcription factor families.AS2/LOB transcription	LBD
5	Cc001358	RNA biosynthesis.transcription factor families.WRKY transcription	WRKY
5	Cc001453	RNA biosynthesis.transcription factor families.GRAS transcription	GRAS
5	Cc002394	RNA biosynthesis.transcription factor families.GRAS transcription	GRAS
5	Cc002454	RNA biosynthesis.transcription factor families.MYB superfamily.MYB	MYB
5	Cc002496	RNA biosynthesis.transcription factor families.bZIP superfamily.bZIP	bZIP
5	Cc002782	RNA biosynthesis.transcription factor families.B3 superfamily.ARF	ARF
5	Cc002853	RNA biosynthesis.transcription factor families.HB (Homeobox)	HD-ZIP
5	Cc002903	RNA biosynthesis.transcription factor families.B3 superfamily.ARF	ARF
5	Cc003847	RNA biosynthesis.transcription factor families.C2C2 superfamily.GATA	GATA
5	Cc003852	RNA biosynthesis.transcription factor families.JUMONJI transcription	C2H2
5	Cc004547	hypothetical protein	C2H2
5	Cc004954	RNA biosynthesis.transcription factor families.AP2/ERF superfamily.ERF-type	ERF
5	Cc005290	RNA biosynthesis.transcription factor families.bHLH transcription	bHLH
5	Cc005762	RNA biosynthesis.transcription factor families.C3H zinc finger	C3H
5	Cc006099	Phytohormones.gibberellin.perception and signal transduction.DELLA-type	GRAS
5	Cc006326	RNA biosynthesis.transcription factor families.B3 superfamily.ARF	ARF
5	Cc006395	RNA biosynthesis.transcription factor families.HB (Homeobox)	HD-ZIP
5	Cc007552	RNA biosynthesis.transcription factor families.MADS box transcription	MIKC_MADS
5	Cc007553	RNA biosynthesis.transcription factor families.SBP transcription	SBP
5	Cc007586	RNA biosynthesis.transcription factor families.MYB superfamily.MYB	MYB-related
5	Cc008277	RNA biosynthesis.transcription factor families.SBP transcription	SBP
5	Cc008678	RNA biosynthesis.transcription factor families.B3 superfamily.ARF	ARF
5	Cc009144	RNA biosynthesis.transcription factor families.C2H2 zinc finger	C2H2
5	Cc009761	RNA biosynthesis.transcription factor families.SBP transcription	SBP
5	Cc010144	RNA biosynthesis.transcription factor families.SBP transcription	SBP
5	Cc010173	RNA biosynthesis.transcription factor families.MYB superfamily.MYB	MYB
5	Cc011490	RNA biosynthesis.transcription factor families.C3H zinc finger	C3H
5	Cc011937	RNA biosynthesis.transcription factor families.HB (Homeobox)	HD-ZIP
5	Cc012529	RNA biosynthesis.transcription factor families.HB (Homeobox)	ZF-HD
5	Cc013236	RNA biosynthesis.transcription factor families.MYB superfamily.MYB-related	MYB-related
5	Cc013402	RNA biosynthesis.transcription factor families.AP2/ERF superfamily.AP2-type	AP2
5	Cc013896	RNA biosynthesis.transcription factor families.C2C2 superfamily.GATA	GATA
5	Cc013984	RNA biosynthesis.transcription factor families.HB (Homeobox)	TALE
5	Cc013992	RNA biosynthesis.transcription factor families.GRF-GIF transcriptional	GRF
5	Cc014447	RNA biosynthesis.transcription factor families.bZIP superfamily.bZIP	bZIP
5	Cc014754	RNA biosynthesis.transcription factor families.B3 superfamily.ARF	ARF
5	Cc015621	RNA biosynthesis.transcription factor families.B3 superfamily.RAV/NGATHA	RAV
5	Cc015702	RNA biosynthesis.transcription factor families.MYB superfamily.MYB	MYB
5	Cc015965	RNA biosynthesis.transcription factor families.NAC transcription	NAC
5	Cc016280	RNA biosynthesis.transcription factor families.HB (Homeobox)	HD-ZIP
5	Cc016291	RNA biosynthesis.transcription factor families.bHLH transcription	bHLH
5	Cc016387	RNA biosynthesis.transcription factor families.B3 superfamily.ARF	ARF
5	Cc016776	Phytohormones.ethylene.perception and signal transduction.EIN3-type	EIL
5	Cc016864	RNA biosynthesis.transcription factor families.HB (Homeobox)	ZF-HD
5	Cc017046	RNA biosynthesis.transcription factor families.NF-Y transcription	NF-YA
5	Cc017081	Phytohormones.ethylene.perception and signal transduction.EIN3-type	EIL
5	Cc017187	RNA biosynthesis.transcription factor families.B3 superfamily.ARF	ARF
5	Cc017214	RNA biosynthesis.transcription factor families.C3H zinc finger	C3H
5	Cc017902	RNA biosynthesis.transcription factor families.SBP transcription	SBP
5	Cc018528	RNA biosynthesis.transcription factor families.AP2/ERF superfamily.AP2-type	AP2
5	Cc018629	RNA biosynthesis.transcription factor families.B3 superfamily.ARF	ARF
5	Cc018667	RNA biosynthesis.transcription factor families.AP2/ERF superfamily.AP2-type	AP2
5	Cc018895	RNA biosynthesis.transcription factor families.SBP transcription	SBP
5	Cc019208	RNA biosynthesis.transcription factor families.MYB superfamily.MYB	MYB
5	Cc019662	hypothetical protein	C2H2
5	Cc021269	RNA biosynthesis.transcription factor families.MYB superfamily.MYB	MYB
5	Cc021784	RNA biosynthesis.transcription factor families.C2C2 superfamily.GATA	GATA
5	Cc022556	Phytohormones.ethylene.perception and signal transduction.EIN3-type	EIL
5	Cc022930	RNA biosynthesis.transcription factor families.HB (Homeobox)	HD-ZIP
5	Cc023253	RNA biosynthesis.transcription factor families.C2C2 superfamily.GATA	GATA
5	Cc023759	RNA biosynthesis.transcription factor families.C2H2 zinc finger	C2H2
5	Cc024603	RNA biosynthesis.transcription factor families.HB (Homeobox)	TALE
5	Cc025004	Phytohormones.ethylene.synthesis.1-aminocyclopropane-1-carboxylate	MYB
5	Cc026772	RNA biosynthesis.transcription factor families.HB (Homeobox)	TALE
5	Cc026796	Phytohormones.ethylene.perception and signal transduction.EIN3-type	EIL
5	Cc027369	Phytohormones.cytokinin.perception and signal transduction.B-type	ARR-B
5	Cc027796	RNA biosynthesis.transcription factor families.GRF-GIF transcriptional	GRF
5	Cc027811	RNA biosynthesis.transcription factor families.B3 superfamily.ARF	ARF
5	Cc028267	RNA biosynthesis.transcription factor families.Trihelix transcription	Trihelix
5	Cc028355	Phytohormones.ethylene.perception and signal transduction.EIN3-type	EIL
5	Cc029585	RNA biosynthesis.transcription factor families.MYB superfamily.MYB	MYB
5	Cc030653	RNA biosynthesis.transcription factor families.TCP transcription	TCP
5	Cc030791	RNA biosynthesis.transcription factor families.SBP transcription	SBP
5	Cc030804	RNA biosynthesis.transcription factor families.TCP transcription	TCP
5	Cc030957	RNA biosynthesis.transcription factor families.GRF-GIF transcriptional	GRF
5	Cc030963	RNA biosynthesis.transcription factor families.HB (Homeobox)	TALE
5	Cc032641	RNA biosynthesis.transcription factor families.AP2/ERF superfamily.ERF-type	ERF
5	Cc032975	RNA biosynthesis.transcription factor families.B3 superfamily.ARF	ARF
5	Cc033481	RNA biosynthesis.transcription factor families.HB (Homeobox)	TALE
5	Cc034367	RNA biosynthesis.transcription factor families.B3 superfamily.ARF	ARF
5	Cc035205	RNA biosynthesis.transcription factor families.bHLH transcription	bHLH
5	Cc035229	RNA biosynthesis.transcription factor families.bZIP superfamily.bZIP	bZIP
5	Cc035422	RNA biosynthesis.transcription factor families.C2C2 superfamily.GATA	GATA
5	Cc035525	RNA biosynthesis.transcription factor families.MYB superfamily.MYB	MYB
5	Cc036461	RNA biosynthesis.transcription factor families.HB (Homeobox)	HD-ZIP
5	Cc037290	hypothetical protein	MYB-related
5	Cc039304	RNA biosynthesis.transcription factor families.HB (Homeobox)	TALE
5	Cc041413	RNA biosynthesis.transcription factor families.AP2/ERF superfamily.ERF-type	ERF
5	Cc041501	RNA biosynthesis.transcription factor families.HB (Homeobox)	HD-ZIP
5	Cc041527	RNA biosynthesis.transcription factor families.FAR1 transcription	FAR1
5	Cc041735	RNA biosynthesis.transcription factor families.B3 superfamily.ARF	ARF
5	Cc044079	RNA biosynthesis.transcription factor families.C2H2 zinc finger	C2H2
5	Cc044215	RNA biosynthesis.transcription factor families.GRF-GIF transcriptional	GRF
5	Cc044235	RNA biosynthesis.transcription factor families.B3 superfamily.ARF	ARF
5	Cc044899	RNA biosynthesis.transcription factor families.HB (Homeobox)	HD-ZIP
5	Cc044919	hypothetical protein	MYB-related
5	Cc045171	RNA biosynthesis.transcription factor families.HB (Homeobox)	HD-ZIP
5	Cc046910	RNA biosynthesis.transcription factor families.AS2/LOB transcription	LBD
5	Cc047377	RNA biosynthesis.transcription factor families.AS2/LOB transcription	LBD
5	Cc047578	RNA biosynthesis.transcription factor families.B3 superfamily.ARF	ARF

## Sheet: cluster6
Cluster No.	Gene ID	Description	Family name
6	Cc001597	RNA biosynthesis.transcription factor families.AP2/ERF superfamily.ERF-type	ERF
6	Cc001763	RNA biosynthesis.transcription factor families.C2C2 superfamily.GATA	GATA
6	Cc001774	RNA biosynthesis.transcription factor families.bZIP superfamily.bZIP	bZIP
6	Cc001900	RNA biosynthesis.transcription factor families.MADS box transcription	MIKC_MADS
6	Cc002690	RNA biosynthesis.transcription factor families.TCP transcription	TCP
6	Cc004933	RNA biosynthesis.transcription factor families.TCP transcription	TCP
6	Cc005653	RNA biosynthesis.transcription factor families.HB (Homeobox)	TALE
6	Cc006136	RNA biosynthesis.transcription factor families.MYB superfamily.G2-like	G2-like
6	Cc006914	RNA biosynthesis.transcription factor families.C2C2 superfamily.BBX/CONSTANS	CO-like
6	Cc007766	RNA biosynthesis.transcription factor families.C2C2 superfamily.BBX/CONSTANS	CO-like
6	Cc008267	RNA biosynthesis.transcription factor families.bZIP superfamily.bZIP	bZIP
6	Cc008816	RNA processing.organelle machineries.ribonuclease activities.RNase	Trihelix
6	Cc009320	RNA biosynthesis.transcription factor families.HB (Homeobox)	ZF-HD
6	Cc014140	RNA biosynthesis.transcription factor families.C2C2 superfamily.BBX/DBB	DBB
6	Cc015156	RNA biosynthesis.transcription factor families.AP2/ERF superfamily.ERF-type	ERF
6	Cc016081	RNA processing.organelle machineries.ribonuclease activities.RNase	Trihelix
6	Cc016328	RNA biosynthesis.transcription factor families.AP2/ERF superfamily.DREB-type	ERF
6	Cc016678	RNA biosynthesis.transcription factor families.MYB superfamily.G2-like	G2-like
6	Cc017924	RNA biosynthesis.transcription factor families.MYB superfamily.MYB	MYB
6	Cc018453	RNA biosynthesis.transcription factor families.MYB superfamily.MYB	MYB
6	Cc019548	hypothetical protein	C3H
6	Cc019572	RNA biosynthesis.transcription factor families.NF-Y transcription	NF-Y
6	Cc020078	RNA biosynthesis.transcription factor families.C2C2 superfamily.GATA	GATA
6	Cc020836	RNA biosynthesis.transcription factor families.C3H zinc finger	C3H
6	Cc022523	RNA biosynthesis.transcription factor families.MYB superfamily.MYB	MYB
6	Cc023258	RNA biosynthesis.transcription factor families.JUMONJI transcription	C2H2
6	Cc025827	RNA biosynthesis.RNA polymerase III-dependent transcription.TFIIIa	C2H2
6	Cc026278	RNA biosynthesis.transcription factor families.MYB superfamily.MYB	MYB
6	Cc026880	RNA biosynthesis.RNA polymerase I-dependent transcription.TTF1	MYB-related
6	Cc028262	hypothetical protein	Trihelix
6	Cc030148	hypothetical protein	Trihelix
6	Cc030384	RNA biosynthesis.transcription factor families.MYB superfamily.MYB	MYB
6	Cc031700	RNA biosynthesis.transcription factor families.MADS box transcription	MIKC_MADS
6	Cc032585	RNA biosynthesis.transcription factor families.AP2/ERF superfamily.ERF-type	ERF
6	Cc034331	RNA biosynthesis.transcription factor families.MYB superfamily.G2-like	G2-like
6	Cc034678	RNA biosynthesis.transcription factor families.CPP1-like transcription	CPP
6	Cc034844	RNA biosynthesis.transcription factor families.AP2/ERF superfamily.ERF-type	ERF
6	Cc035101	RNA biosynthesis.transcription factor families.C2C2 superfamily.BBX/DBB	DBB
6	Cc035691	RNA biosynthesis.transcription factor families.LFY transcription	LFY
6	Cc040165	RNA biosynthesis.transcription factor families.TCP transcription	TCP
6	Cc043976	RNA biosynthesis.transcription factor families.HB (Homeobox)	TALE
6	Cc044605	RNA biosynthesis.transcription factor families.C2C2 superfamily.GATA	GATA
6	Cc044839	RNA biosynthesis.transcription factor families.AP2/ERF superfamily.DREB-type	ERF
6	Cc044848	RNA biosynthesis.transcription factor families.AP2/ERF superfamily.DREB-type	ERF
6	Cc044906	RNA biosynthesis.transcription factor families.GRF-GIF transcriptional	GRF
6	Cc045056	RNA biosynthesis.transcription factor families.AP2/ERF superfamily.ERF-type	ERF
6	Cc045554	RNA biosynthesis.transcription factor families.MYB superfamily.MYB	MYB

## Sheet: cluster7
Cluster No.	Gene ID	Description	Family name
7	Cc000114	RNA biosynthesis.transcription factor families.AP2/ERF superfamily.AP2-type	AP2
7	Cc000152	RNA biosynthesis.transcription factor families.WRKY transcription	WRKY
7	Cc000944	RNA biosynthesis.transcription factor families.MYB superfamily.MYB-related	MYB
7	Cc001117	RNA biosynthesis.transcription factor families.C2C2 superfamily.DOF	Dof
7	Cc001314	RNA biosynthesis.transcription factor families.C3H zinc finger	C3H
7	Cc001411	RNA biosynthesis.transcription factor families.TCP transcription	TCP
7	Cc001804	RNA biosynthesis.transcription factor families.bZIP superfamily.bZIP	bZIP
7	Cc001838	RNA biosynthesis.transcription factor families.C2C2 superfamily.DOF	Dof
7	Cc002268	RNA biosynthesis.transcription factor families.NAC transcription	NAC
7	Cc002541	RNA biosynthesis.transcription factor families.AP2/ERF superfamily.ERF-type	ERF
7	Cc002764	RNA biosynthesis.transcription factor families.C2C2 superfamily.DOF	Dof
7	Cc002781	RNA biosynthesis.transcription factor families.VOZ transcription	VOZ
7	Cc002793	RNA biosynthesis.transcription factor families.C2C2 superfamily.DOF	Dof
7	Cc002967	RNA biosynthesis.transcription factor families.NAC transcription	NAC
7	Cc003079	RNA biosynthesis.transcription factor families.HB (Homeobox)	HD-ZIP
7	Cc003431	RNA biosynthesis.transcription factor families.HB (Homeobox)	HD-ZIP
7	Cc003543	RNA biosynthesis.transcription factor families.HB (Homeobox)	HD-ZIP
7	Cc003896	RNA biosynthesis.transcription factor families.NAC transcription	NAC
7	Cc004892	RNA biosynthesis.transcription factor families.SBP transcription	SBP
7	Cc005012	RNA biosynthesis.transcription factor families.HSF (heat shock)	HSF
7	Cc005015	RNA biosynthesis.transcription factor families.C2C2 superfamily.DOF	Dof
7	Cc005118	RNA biosynthesis.transcription factor families.Trihelix transcription	Trihelix
7	Cc005224	RNA biosynthesis.transcription factor families.bHLH transcription	bHLH
7	Cc005504	RNA biosynthesis.transcription factor families.C2H2 zinc finger	C2H2
7	Cc005529	RNA biosynthesis.transcription factor families.C2C2 superfamily.DOF	Dof
7	Cc005573	RNA biosynthesis.transcription factor families.AP2/ERF superfamily.DREB-type	AP2
7	Cc005788	RNA biosynthesis.transcription factor families.bHLH transcription	bHLH
7	Cc006106	RNA biosynthesis.transcription factor families.MYB superfamily.MYB	MYB
7	Cc006125	RNA biosynthesis.transcription factor families.NAC transcription	NAC
7	Cc006304	RNA biosynthesis.transcription factor families.C2C2 superfamily.DOF	Dof
7	Cc006324	RNA biosynthesis.transcription factor families.VOZ transcription	VOZ
7	Cc006337	RNA biosynthesis.transcription factor families.C2C2 superfamily.DOF	Dof
7	Cc006523	RNA biosynthesis.transcription factor families.TCP transcription	TCP
7	Cc006881	hypothetical protein	MYB
7	Cc007152	RNA biosynthesis.transcription factor families.TCP transcription	TCP
7	Cc007540	RNA biosynthesis.transcription factor families.NAC transcription	NAC
7	Cc007565	RNA biosynthesis.transcription factor families.MYB superfamily.MYB	MYB
7	Cc007811	RNA biosynthesis.transcription factor families.C2H2 zinc finger	C2H2
7	Cc008013	RNA biosynthesis.transcription factor families.bZIP superfamily.bZIP	bZIP
7	Cc008014	Cell cycle.interphase.G1 phase.DP transcription factor	E2F-DP
7	Cc008067	RNA biosynthesis.transcription factor families.C3H zinc finger	C3H
7	Cc008139	RNA biosynthesis.transcription factor families.C2C2 superfamily.DOF	Dof
7	Cc008222	RNA biosynthesis.transcription factor families.C2C2 superfamily.GATA	GATA
7	Cc008225	RNA biosynthesis.transcription factor families.C2C2 superfamily.GATA	GATA
7	Cc008337	RNA biosynthesis.transcription factor families.MYB superfamily.MYB	MYB
7	Cc008352	RNA biosynthesis.transcription factor families.bZIP superfamily.bZIP19/23/24	bZIP
7	Cc008724	RNA biosynthesis.transcription factor families.WRKY transcription	WRKY
7	Cc008729	RNA biosynthesis.transcription factor families.C3H zinc finger	C3H
7	Cc008800	RNA biosynthesis.transcription factor families.NAC transcription	NAC
7	Cc008830	RNA biosynthesis.transcription factor families.C2H2 zinc finger	C2H2
7	Cc008901	RNA biosynthesis.transcription factor families.HB (Homeobox)	HD-ZIP
7	Cc009139	RNA biosynthesis.transcription factor families.bZIP superfamily.bZIP	bZIP
7	Cc009349	RNA biosynthesis.transcription factor families.CAMTA transcription	CAMTA
7	Cc009403	RNA biosynthesis.transcription factor families.WRKY transcription	WRKY
7	Cc009592	RNA biosynthesis.transcription factor families.C2H2 zinc finger	C2H2
7	Cc009617	RNA biosynthesis.transcription factor families.bZIP superfamily.bZIP	bZIP
7	Cc009833	RNA biosynthesis.transcription factor families.bZIP superfamily.bZIP	bZIP
7	Cc009894	RNA biosynthesis.transcription factor families.WRKY transcription	WRKY
7	Cc010085	RNA biosynthesis.transcription factor families.C2H2 zinc finger	C2H2
7	Cc010132	RNA biosynthesis.transcription factor families.NAC transcription	NAC
7	Cc010136	RNA biosynthesis.transcription factor families.TCP transcription	TCP
7	Cc010644	RNA biosynthesis.transcription factor families.MYB superfamily.MYB	MYB
7	Cc011529	RNA biosynthesis.transcription factor families.MYB superfamily.MYB	MYB
7	Cc011554	RNA biosynthesis.transcription factor families.C2C2 superfamily.DOF	Dof
7	Cc011595	RNA biosynthesis.transcription factor families.MYB superfamily.MYB-related	MYB-related
7	Cc012458	DNA damage response.DNA damage sensing and signaling.DNA damage	NAC
7	Cc012532	RNA biosynthesis.transcription factor families.C2C2 superfamily.DOF	Dof
7	Cc012721	RNA biosynthesis.transcription factor families.VOZ transcription	VOZ
7	Cc012726	RNA biosynthesis.transcription factor families.VOZ transcription	VOZ
7	Cc012886	RNA biosynthesis.transcription factor families.HB (Homeobox)	HD-ZIP
7	Cc013108	RNA biosynthesis.transcription factor families.MYB superfamily.G2-like	G2-like
7	Cc013224	RNA biosynthesis.transcription factor families.C2C2 superfamily.DOF	Dof
7	Cc013822	RNA biosynthesis.transcription factor families.C2C2 superfamily.DOF	Dof
7	Cc014044	RNA biosynthesis.transcription factor families.bHLH transcription	bHLH
7	Cc014083	RNA biosynthesis.transcription factor families.C2C2 superfamily.DOF	Dof
7	Cc014103	Phytohormones.brassinosteroid.perception and signal transduction.BES/BZR-type	BES
7	Cc014618	RNA biosynthesis.transcription factor families.WRKY transcription	WRKY
7	Cc014654	RNA biosynthesis.transcription factor families.AP2/ERF superfamily.ERF-type	ERF
7	Cc014675	hypothetical protein	MYB-related
7	Cc014873	RNA biosynthesis.transcription factor families.AP2/ERF superfamily.DREB-type	ERF
7	Cc014964	RNA biosynthesis.transcription factor families.AP2/ERF superfamily.ERF-type	ERF
7	Cc015038	RNA biosynthesis.transcription factor families.B3 superfamily.LAV-ABI3	B3
7	Cc015478	RNA biosynthesis.transcription factor families.C2C2 superfamily.GATA	GATA
7	Cc015579	RNA biosynthesis.transcription factor families.C3H zinc finger	C3H
7	Cc015829	RNA biosynthesis.transcription factor families.WRKY transcription	WRKY
7	Cc016063	RNA biosynthesis.transcription factor families.NAC transcription	NAC
7	Cc016098	RNA biosynthesis.transcription factor families.C2H2 zinc finger	C2H2
7	Cc017071	RNA biosynthesis.RNA polymerase II-dependent transcription.pre-initiation	NF-YC
7	Cc017300	RNA biosynthesis.transcription factor families.C2H2 zinc finger	C2H2
7	Cc017304	RNA biosynthesis.transcription factor families.BBR/BPC transcription	BBR-BPC
7	Cc017385	RNA biosynthesis.transcription factor families.C2C2 superfamily.DOF	Dof
7	Cc017472	RNA biosynthesis.transcription factor families.bHLH transcription	bHLH
7	Cc017538	RNA biosynthesis.transcription factor families.MYB superfamily.MYB	MYB-related
7	Cc017745	Phytohormones.brassinosteroid.perception and signal transduction.BES/BZR-type	BES
7	Cc017913	RNA biosynthesis.transcription factor families.bHLH transcription	bHLH
7	Cc018231	RNA biosynthesis.transcription factor families.C3H zinc finger	C3H
7	Cc018560	RNA biosynthesis.transcription factor families.AS2/LOB transcription	LBD
7	Cc018987	RNA biosynthesis.transcription factor families.MYB superfamily.MYB	MYB
7	Cc019946	RNA biosynthesis.transcription factor families.NAC transcription	NAC
7	Cc020250	RNA biosynthesis.transcription factor families.MYB superfamily.MYB	MYB
7	Cc020668	RNA biosynthesis.transcription factor families.WRKY transcription	WRKY
7	Cc020813	RNA biosynthesis.transcription factor families.AP2/ERF superfamily.DREB-type	ERF
7	Cc020976	Phytohormones.ethylene.perception and signal transduction.EIN3-type	EIL
7	Cc021140	RNA biosynthesis.transcription factor families.NF-Y transcription	NF-Y
7	Cc021537	RNA biosynthesis.transcription factor families.NAC transcription	NAC
7	Cc021595	RNA biosynthesis.transcription factor families.MYB superfamily.G2-like	G2-like
7	Cc021733	RNA biosynthesis.transcription factor families.MADS box transcription	MIKC_MADS
7	Cc021922	RNA biosynthesis.transcription factor families.AP2/ERF superfamily.DREB-type	ERF
7	Cc021980	hypothetical protein	MYB
7	Cc022262	RNA biosynthesis.transcription factor families.C2C2 superfamily.DOF	Dof
7	Cc022609	RNA biosynthesis.transcription factor families.AP2/ERF superfamily.AP2-type	AP2
7	Cc022650	RNA biosynthesis.transcription factor families.WRKY transcription	WRKY
7	Cc022681	RNA biosynthesis.transcription factor families.NAC transcription	NAC
7	Cc022994	RNA biosynthesis.transcription factor families.SBP transcription	SBP
7	Cc023084	RNA biosynthesis.transcription factor families.HSF (heat shock)	HSF
7	Cc023130	RNA biosynthesis.transcription factor families.C3H zinc finger	C3H
7	Cc023540	RNA biosynthesis.transcription factor families.MYB superfamily.MYB-related	MYB-related
7	Cc023560	RNA biosynthesis.transcription factor families.AP2/ERF superfamily.ERF-type	ERF
7	Cc023697	RNA biosynthesis.transcription factor families.bHLH transcription	bHLH
7	Cc023733	RNA biosynthesis.transcription factor families.C2C2 superfamily.DOF	Dof
7	Cc023914	RNA biosynthesis.transcription factor families.bZIP superfamily.bZIP	bZIP
7	Cc024260	RNA biosynthesis.transcription factor families.AP2/ERF superfamily.ERF-type	ERF
7	Cc024701	RNA biosynthesis.transcription factor families.WRKY transcription	WRKY
7	Cc024941	RNA biosynthesis.transcription factor families.CPP1-like transcription	CPP
7	Cc024958	RNA biosynthesis.transcription factor families.CPP1-like transcription	CPP
7	Cc025140	RNA biosynthesis.transcription factor families.bZIP superfamily.bZIP	bZIP
7	Cc025634	RNA biosynthesis.transcription factor families.C2C2 superfamily.BBX/CONSTANS	CO-like
7	Cc025869	RNA biosynthesis.transcription factor families.bZIP superfamily.bZIP	bZIP
7	Cc025870	Cell cycle.interphase.G1 phase.DP transcription factor	E2F-DP
7	Cc025952	RNA biosynthesis.transcription factor families.NAC transcription	NAC
7	Cc026130	RNA biosynthesis.transcription factor families.SRS transcription	SRS
7	Cc026132	RNA biosynthesis.transcription factor families.MADS box transcription	MIKC_MADS
7	Cc026611	RNA biosynthesis.transcription factor families.NAC transcription	NAC
7	Cc027108	RNA biosynthesis.transcription factor families.HB (Homeobox)	HD-ZIP
7	Cc028562	RNA biosynthesis.transcription factor families.bHLH transcription	bHLH
7	Cc029300	RNA biosynthesis.transcription factor families.AP2/ERF superfamily.DREB-type	ERF
7	Cc029617	DNA damage response.DNA damage sensing and signaling.DNA damage	NAC
7	Cc030009	RNA biosynthesis.transcription factor families.C3H zinc finger	C3H
7	Cc030086	RNA biosynthesis.transcription factor families.NAC transcription	NAC
7	Cc030452	RNA biosynthesis.transcription factor families.C2C2 superfamily.DOF	Dof
7	Cc030638	RNA biosynthesis.transcription factor families.NAC transcription	NAC
7	Cc030872	RNA biosynthesis.transcription factor families.NAC transcription	NAC
7	Cc031506	RNA biosynthesis.transcription factor families.WRKY transcription	WRKY
7	Cc031540	RNA biosynthesis.transcription factor families.C2C2 superfamily.DOF	Dof
7	Cc031562	RNA biosynthesis.transcription factor families.C2H2 zinc finger	C2H2
7	Cc031971	RNA biosynthesis.transcription factor families.MYB superfamily.MYB	MYB
7	Cc032105	Phytohormones.cytokinin.synthesis.cytokinin phosphoribohydrolase	NAC
7	Cc032743	RNA biosynthesis.transcription factor families.C2C2 superfamily.BBX/CONSTANS	CO-like
7	Cc032784	RNA biosynthesis.transcription factor families.MYB superfamily.MYB	MYB
7	Cc032995	RNA biosynthesis.transcription factor families.AS2/LOB transcription	LBD
7	Cc033129	RNA biosynthesis.transcription factor families.AP2/ERF superfamily.DREB-type	ERF
7	Cc033189	RNA biosynthesis.transcription factor families.MYB superfamily.MYB-related	MYB-related
7	Cc033536	RNA biosynthesis.transcription factor families.C2H2 zinc finger	C2H2
7	Cc034059	RNA biosynthesis.transcription factor families.C2C2 superfamily.GATA	GATA
7	Cc034109	hypothetical protein	STAT
7	Cc034195	hypothetical protein	STAT
7	Cc034291	RNA biosynthesis.transcription factor families.MYB superfamily.MYB	MYB
7	Cc034318	RNA biosynthesis.transcription factor families.NAC transcription	NAC
7	Cc034601	RNA biosynthesis.transcription factor families.HB (Homeobox)	HD-ZIP
7	Cc034629	RNA biosynthesis.transcription factor families.GRAS transcription	GRAS
7	Cc034942	RNA biosynthesis.transcription factor families.WRKY transcription	WRKY
7	Cc035111	RNA biosynthesis.transcription factor families.B3 superfamily.ARF	ARF
7	Cc035805	RNA biosynthesis.transcription factor families.bZIP superfamily.bZIP	bZIP
7	Cc035862	RNA biosynthesis.transcription factor families.NAC transcription	NAC
7	Cc035870	RNA biosynthesis.transcription factor families.AS2/LOB transcription	LBD
7	Cc035983	RNA biosynthesis.transcription factor families.NAC transcription	NAC
7	Cc036054	RNA biosynthesis.RNA polymerase IV-dependent siRNA biogenesis.SHH	HB-other
7	Cc036620	RNA biosynthesis.transcription factor families.AP2/ERF superfamily.DREB-type	ERF
7	Cc036930	RNA biosynthesis.transcription factor families.bZIP superfamily.bZIP	bZIP
7	Cc037319	RNA biosynthesis.transcription factor families.AP2/ERF superfamily.AP2-type	AP2
7	Cc037328	RNA biosynthesis.transcription factor families.MYB superfamily.MYB	MYB-related
7	Cc037644	RNA biosynthesis.transcription factor families.C3H zinc finger	C3H
7	Cc038987	RNA biosynthesis.transcription factor families.bHLH transcription	bHLH
7	Cc039699	RNA biosynthesis.transcription factor families.C3H zinc finger	C3H
7	Cc039845	RNA biosynthesis.transcription factor families.C2C2 superfamily.DOF	Dof
7	Cc041371	RNA biosynthesis.transcription factor families.HSF (heat shock)	HSF
7	Cc041403	RNA biosynthesis.transcription factor families.VOZ transcription	VOZ
7	Cc041405	RNA biosynthesis.transcription factor families.HB (Homeobox)	HB-other
7	Cc042099	RNA biosynthesis.transcription factor families.C3H zinc finger	C3H
7	Cc044009	RNA biosynthesis.transcription factor families.MYB superfamily.MYB	MYB
7	Cc044075	Phytohormones.brassinosteroid.perception and signal transduction.BES/BZR-type	BES
7	Cc044328	hypothetical protein	MYB
7	Cc044396	RNA biosynthesis.transcription factor families.AP2/ERF superfamily.DREB-type	ERF
7	Cc044484	RNA biosynthesis.transcription factor families.NAC transcription	NAC
7	Cc045551	RNA biosynthesis.transcription factor families.C2C2 superfamily.DOF	Dof
7	Cc045605	RNA biosynthesis.transcription factor families.AP2/ERF superfamily.ERF-type	ERF
7	Cc045639	RNA biosynthesis.transcription factor families.MYB superfamily.MYB	MYB
7	Cc045690	RNA biosynthesis.transcription factor families.CPP1-like transcription	CPP
7	Cc045713	RNA biosynthesis.transcription factor families.C3H zinc finger	C3H
7	Cc046128	RNA biosynthesis.transcription factor families.bHLH transcription	bHLH
7	Cc046156	RNA biosynthesis.transcription factor families.CAMTA transcription	CAMTA
7	Cc046477	RNA biosynthesis.transcription factor families.WRKY transcription	WRKY
7	Cc046923	RNA biosynthesis.transcription factor families.C3H zinc finger	C3H
7	Cc046956	RNA biosynthesis.transcription factor families.MYB superfamily.MYB	MYB
7	Cc047153	RNA biosynthesis.transcription factor families.NAC transcription	NAC
7	Cc047294	RNA biosynthesis.transcription factor families.GRF-GIF transcriptional	GRF
7	Cc047354	RNA biosynthesis.transcription factor families.AP2/ERF superfamily.AP2-type	AP2
7	Cc047363	RNA biosynthesis.transcription factor families.MYB superfamily.MYB	MYB
7	Cc047394	RNA biosynthesis.transcription factor families.GRAS transcription	GRAS
7	Cc047423	RNA biosynthesis.transcription factor families.HB (Homeobox)	HD-ZIP

## Sheet: cluster8
Cluster No.	Gene ID	Description	Family name
8	Cc000048	RNA biosynthesis.transcription factor families.WRKY transcription	WRKY
8	Cc000163	RNA biosynthesis.transcription factor families.HSF (heat shock)	HSF
8	Cc000413	Chromatin assembly and remodeling.histones.H2A-type histone	NF-YC
8	Cc000880	hypothetical protein	C3H
8	Cc000891	RNA biosynthesis.transcription factor families.C3H zinc finger	C3H
8	Cc001187	RNA biosynthesis.transcription factor families.MYB superfamily.MYB-related	MYB-related
8	Cc001622	RNA biosynthesis.transcription factor families.CAMTA transcription	CAMTA
8	Cc002187	RNA biosynthesis.transcription factor families.SBP transcription	SBP
8	Cc002635	RNA biosynthesis.transcription factor families.HB (Homeobox)	HD-ZIP
8	Cc003028	RNA biosynthesis.transcription factor families.HB (Homeobox)	HB-PHD
8	Cc003033	RNA biosynthesis.transcription factor families.MYB superfamily.MYB	MYB
8	Cc003428	RNA biosynthesis.transcription factor families.AP2/ERF superfamily.DREB-type	ERF
8	Cc003662	RNA biosynthesis.transcription factor families.NIN-like superfamily.NLP	Nin-like
8	Cc004217	RNA biosynthesis.transcription factor families.Trihelix transcription	Trihelix
8	Cc004368	RNA biosynthesis.transcription factor families.C3H zinc finger	C3H
8	Cc005093	RNA biosynthesis.transcription factor families.bZIP superfamily.bZIP	bZIP
8	Cc005164	RNA biosynthesis.transcription factor families.C3H zinc finger	C3H
8	Cc005385	hypothetical protein	ERF
8	Cc005542	RNA biosynthesis.transcription factor families.bZIP superfamily.bZIP	bZIP
8	Cc005682	RNA biosynthesis.transcription factor families.MYB superfamily.MYB	MYB
8	Cc005687	RNA biosynthesis.transcription factor families.WRKY transcription	WRKY
8	Cc006081	RNA biosynthesis.transcription factor families.AP2/ERF superfamily.AP2-type	AP2
8	Cc006288	RNA biosynthesis.transcription factor families.WRKY transcription	WRKY
8	Cc006418	RNA biosynthesis.transcription factor families.WRKY transcription	WRKY
8	Cc006470	RNA biosynthesis.transcription factor families.CAMTA transcription	CAMTA
8	Cc006627	RNA biosynthesis.transcription factor families.MYB superfamily.MYB-related	MYB-related
8	Cc007051	RNA biosynthesis.transcription factor families.MYB superfamily.MYB-related	MYB-related
8	Cc007588	RNA biosynthesis.transcription factor families.MYB superfamily.G2-like	G2-like
8	Cc008403	RNA biosynthesis.transcription factor families.WRKY transcription	WRKY
8	Cc008500	RNA biosynthesis.transcription factor families.FAR1 transcription	FAR1
8	Cc008538	RNA biosynthesis.transcription factor families.NAC transcription	NAC
8	Cc008898	RNA biosynthesis.transcription factor families.AP2/ERF superfamily.DREB-type	ERF
8	Cc009190	RNA biosynthesis.transcription factor families.C2C2 superfamily.GATA	GATA
8	Cc009984	RNA biosynthesis.transcription factor families.FAR1 transcription	FAR1
8	Cc010594	RNA biosynthesis.transcription factor families.GRAS transcription	GRAS
8	Cc011597	RNA biosynthesis.transcription factor families.bHLH transcription	bHLH
8	Cc012261	RNA biosynthesis.transcription factor families.AS2/LOB transcription	LBD
8	Cc012834	RNA biosynthesis.transcription factor families.MYB superfamily.G2-like	G2-like
8	Cc013404	Environmental stimuli response.programmed cell death (PCD).LSD/LOL	LSD
8	Cc014028	RNA biosynthesis.transcription factor families.WRKY transcription	WRKY
8	Cc015382	Phytohormones.brassinosteroid.perception and signal transduction.BES/BZR-type	BES
8	Cc015426	Carbohydrate metabolism.starch metabolism.degradation.hydrolysis	BES
8	Cc015467	RNA biosynthesis.transcription factor families.NAC transcription	NAC
8	Cc015877	RNA biosynthesis.transcription factor families.NF-Y transcription	NF-Y
8	Cc015938	RNA biosynthesis.transcription factor families.C2H2 zinc finger	C2H2
8	Cc016475	RNA biosynthesis.transcription factor families.C3H zinc finger	C3H
8	Cc016487	hypothetical protein	C3H
8	Cc016585	RNA biosynthesis.transcription factor families.C2C2 superfamily.GATA	GATA
8	Cc017004	Phytohormones.ethylene.perception and signal transduction.EIN3-type	EIL
8	Cc017517	RNA biosynthesis.transcription factor families.HB (Homeobox)	HD-ZIP
8	Cc017781	RNA biosynthesis.transcription factor families.Trihelix transcription	Trihelix
8	Cc017906	RNA biosynthesis.transcription factor families.bZIP superfamily.bZIP	bZIP
8	Cc018530	Environmental stimuli response.programmed cell death (PCD).LSD/LOL	LSD
8	Cc019076	Chromatin assembly and remodeling.histones.H2A-type histone	NF-YC
8	Cc019485	Phytohormones.ethylene.perception and signal transduction.EIN3-type	EIL
8	Cc019627	RNA biosynthesis.transcription factor families.SBP transcription	SBP
8	Cc020138	RNA biosynthesis.transcription factor families.AP2/ERF superfamily.DREB-type	ERF
8	Cc020517	RNA biosynthesis.transcription factor families.GeBP transcription	GeBP
8	Cc020569	RNA biosynthesis.transcription factor families.bZIP superfamily.bZIP	bZIP
8	Cc021471	RNA biosynthesis.transcription factor families.HB (Homeobox)	HB-other
8	Cc021943	RNA biosynthesis.transcription factor families.C2H2 zinc finger	C2H2
8	Cc022329	RNA biosynthesis.transcription factor families.C2H2 zinc finger	C2H2
8	Cc022664	RNA biosynthesis.transcription factor families.HSF (heat shock)	HSF
8	Cc023677	RNA biosynthesis.transcription factor families.WRKY transcription	WRKY
8	Cc024601	RNA biosynthesis.transcription factor families.MYB superfamily.MYB-related	MYB-related
8	Cc024857	RNA biosynthesis.transcription factor families.bZIP superfamily.bZIP	bZIP
8	Cc024859	hypothetical protein	G2-like
8	Cc025038	RNA biosynthesis.transcription factor families.AP2/ERF superfamily.ERF-type	ERF
8	Cc025049	RNA biosynthesis.transcription factor families.WRKY transcription	WRKY
8	Cc025381	RNA biosynthesis.transcription factor families.MYB superfamily.MYB	MYB
8	Cc025386	RNA biosynthesis.transcription factor families.HB (Homeobox)	HB-PHD
8	Cc025518	RNA biosynthesis.transcription factor families.MADS box transcription	MIKC_MADS
8	Cc025547	RNA biosynthesis.transcription factor families.WRKY transcription	WRKY
8	Cc025556	RNA biosynthesis.transcription factor families.WRKY transcription	WRKY
8	Cc026200	RNA biosynthesis.transcription factor families.FAR1 transcription	FAR1
8	Cc026774	RNA biosynthesis.transcription factor families.SRS transcription	SRS
8	Cc026871	RNA biosynthesis.transcription factor families.GRAS transcription	GRAS
8	Cc027677	RNA biosynthesis.transcription factor families.B3 superfamily.ARF	ARF
8	Cc027808	RNA biosynthesis.transcription factor families.bZIP superfamily.bZIP	bZIP
8	Cc028108	RNA biosynthesis.transcription factor families.GeBP transcription	GeBP
8	Cc028229	RNA biosynthesis.transcription factor families.C2H2 zinc finger	C2H2
8	Cc028485	RNA biosynthesis.transcription factor families.AP2/ERF superfamily.DREB-type	ERF
8	Cc028656	hypothetical protein	G2-like
8	Cc028880	RNA biosynthesis.transcription factor families.C2H2 zinc finger	C2H2
8	Cc029096	RNA biosynthesis.transcription factor families.NAC transcription	NAC
8	Cc029267	RNA biosynthesis.transcription factor families.C3H zinc finger	C3H
8	Cc030494	RNA biosynthesis.transcription factor families.MYB superfamily.MYB-related	MYB
8	Cc030852	RNA biosynthesis.transcription factor families.Trihelix transcription	Trihelix
8	Cc030905	RNA biosynthesis.transcription factor families.HB (Homeobox)	WOX
8	Cc031191	RNA biosynthesis.transcription factor families.B3 superfamily.ARF	ARF
8	Cc032565	DNA damage response.DNA damage sensing and signaling.DNA damage	NAC
8	Cc033798	RNA biosynthesis.transcription factor families.HB (Homeobox)	WOX
8	Cc036773	RNA biosynthesis.transcription factor families.Trihelix transcription	Trihelix
8	Cc037262	RNA biosynthesis.transcription factor families.HSF (heat shock)	HSF
8	Cc037310	RNA biosynthesis.transcription factor families.B3 superfamily.REM	B3
8	Cc037321	RNA biosynthesis.transcription factor families.AP2/ERF superfamily.DREB-type	ERF
8	Cc037803	RNA biosynthesis.transcription factor families.HB (Homeobox)	HB-other
8	Cc039306	RNA biosynthesis.transcription factor families.MYB superfamily.MYB-related	MYB-related
8	Cc040048	RNA biosynthesis.transcription factor families.C2C2 superfamily.DOF	Dof
8	Cc041487	RNA biosynthesis.transcription factor families.bHLH transcription	bHLH
8	Cc044664	RNA biosynthesis.transcription factor families.AP2/ERF superfamily.DREB-type	ERF
8	Cc044945	RNA biosynthesis.transcription factor families.HSF (heat shock)	HSF
8	Cc045096	RNA biosynthesis.transcription factor families.bHLH transcription	bHLH
8	Cc046230	RNA biosynthesis.transcription factor families.NAC transcription	NAC
8	Cc046993	RNA biosynthesis.transcription factor families.bZIP superfamily.bZIP	bZIP
8	Cc047325	RNA biosynthesis.transcription factor families.C2C2 superfamily.DOF	Dof
8	Cc047357	RNA biosynthesis.transcription factor families.AP2/ERF superfamily.DREB-type	ERF

## Sheet: cluster9
Cluster No.	Gene ID	Description	Family name
9	Cc000086	RNA biosynthesis.transcription factor families.MYB superfamily.MYB	MYB
9	Cc000379	RNA biosynthesis.transcription factor families.NAC transcription	NAC
9	Cc001018	RNA biosynthesis.transcription factor families.B3 superfamily.LAV-VAL	B3
9	Cc001310	hypothetical protein	NF-X1
9	Cc001593	RNA biosynthesis.transcription factor families.AS2/LOB transcription	LBD
9	Cc001912	RNA biosynthesis.transcription factor families.WRKY transcription	WRKY
9	Cc002540	RNA biosynthesis.transcription factor families.AP2/ERF superfamily.ERF-type	ERF
9	Cc002626	RNA biosynthesis.transcription factor families.C2H2 zinc finger	C2H2
9	Cc002873	RNA biosynthesis.transcription factor families.WRKY transcription	WRKY
9	Cc003075	RNA biosynthesis.transcription factor families.C2C2 superfamily.GATA	GATA
9	Cc003190	hypothetical protein	ERF
9	Cc003578	hypothetical protein	Trihelix
9	Cc003677	RNA biosynthesis.transcription factor families.bZIP superfamily.bZIP	bZIP
9	Cc004013	RNA biosynthesis.transcription factor families.AP2/ERF superfamily.ERF-type	ERF
9	Cc004244	RNA biosynthesis.transcription factor families.C2H2 zinc finger	C2H2
9	Cc004251	RNA biosynthesis.transcription factor families.C2C2 superfamily.YABBY	YABBY
9	Cc004836	RNA biosynthesis.transcription factor families.C2H2 zinc finger	C2H2
9	Cc005069	RNA biosynthesis.transcription factor families.AP2/ERF superfamily.AP2-type	AP2
9	Cc005247	RNA biosynthesis.transcription factor families.MYB superfamily.MYB	MYB
9	Cc005317	RNA biosynthesis.transcription factor families.AP2/ERF superfamily.APD1	ERF
9	Cc005829	RNA biosynthesis.transcription factor families.HB (Homeobox)	HB-other
9	Cc006548	RNA biosynthesis.transcription factor families.B3 superfamily.ARF	ARF
9	Cc007125	RNA biosynthesis.transcription factor families.B3 superfamily.ARF	ARF
9	Cc007695	RNA biosynthesis.transcription factor families.MYB superfamily.MYB-related	MYB-related
9	Cc008000	RNA biosynthesis.transcription factor families.bZIP superfamily.bZIP	bZIP
9	Cc008127	RNA biosynthesis.transcription factor families.GRAS transcription	GRAS
9	Cc008347	RNA biosynthesis.transcription factor families.MYB superfamily.MYB	MYB
9	Cc008813	RNA biosynthesis.transcription factor families.C3H zinc finger	C3H
9	Cc008960	RNA biosynthesis.transcription factor families.bHLH transcription	bHLH
9	Cc009134	RNA biosynthesis.transcription factor families.HB (Homeobox)	HB-other
9	Cc009162	RNA biosynthesis.transcription factor families.HB (Homeobox)	ZF-HD
9	Cc009830	RNA biosynthesis.transcription factor families.MYB superfamily.MYB	MYB
9	Cc010295	RNA biosynthesis.transcription factor families.MYB superfamily.MYB-related	MYB-related
9	Cc011017	RNA biosynthesis.transcription factor families.Trihelix transcription	Trihelix
9	Cc011491	Chromatin assembly and remodeling.histone modifications.histone	C2H2
9	Cc011548	RNA biosynthesis.transcription factor families.MYB superfamily.MYB	MYB
9	Cc011998	RNA biosynthesis.transcription factor families.WRKY transcription	WRKY
9	Cc012271	RNA biosynthesis.transcription factor families.B3 superfamily.ARF	ARF
9	Cc012923	hypothetical protein	Trihelix
9	Cc013241	RNA biosynthesis.transcription factor families.GRAS transcription	GRAS
9	Cc013311	RNA biosynthesis.transcription factor families.NAC transcription	NAC
9	Cc013352	RNA biosynthesis.transcription factor families.MYB superfamily.MYB	MYB
9	Cc013799	RNA biosynthesis.transcription factor families.GRAS transcription	GRAS
9	Cc013895	RNA biosynthesis.transcription factor families.B3 superfamily.ARF	ARF
9	Cc014070	RNA biosynthesis.transcription factor families.MYB superfamily.MYB	MYB
9	Cc014571	hypothetical protein	C3H
9	Cc014696	RNA biosynthesis.transcription factor families.MYB superfamily.MYB	MYB
9	Cc014936	RNA biosynthesis.transcription factor families.AS2/LOB transcription	LBD
9	Cc015165	RNA biosynthesis.transcription factor families.B3 superfamily.LAV-VAL	B3
9	Cc015995	RNA biosynthesis.transcription factor families.MYB superfamily.MYB	MYB
9	Cc016756	RNA biosynthesis.transcription factor families.MYB superfamily.MYB	MYB
9	Cc017413	RNA biosynthesis.transcription factor families.GRAS transcription	GRAS
9	Cc017463	RNA biosynthesis.transcription factor families.MYB superfamily.MYB	MYB
9	Cc017545	RNA biosynthesis.transcription factor families.C2H2 zinc finger	C2H2
9	Cc017674	RNA biosynthesis.transcription factor families.C2H2 zinc finger	C2H2
9	Cc017722	RNA biosynthesis.transcription factor families.MYB superfamily.MYB-related	MYB-related
9	Cc017815	RNA biosynthesis.transcription factor families.B3 superfamily.RAV/NGATHA	B3
9	Cc018403	RNA biosynthesis.transcription factor families.NAC transcription	NAC
9	Cc019108	RNA biosynthesis.transcription factor families.NAC transcription	NAC
9	Cc019888	hypothetical protein	ERF
9	Cc019979	RNA biosynthesis.transcription factor families.SBP transcription	SBP
9	Cc020140	RNA biosynthesis.transcription factor families.MYB superfamily.G2-like	G2-like
9	Cc020277	RNA biosynthesis.transcription factor families.GeBP transcription	GeBP
9	Cc020407	RNA biosynthesis.RNA polymerase II-dependent transcription.pre-initiation	NF-YC
9	Cc020775	RNA biosynthesis.transcription factor families.MYB superfamily.MYB	MYB
9	Cc020837	RNA biosynthesis.transcription factor families.AP2/ERF superfamily.ERF-type	ERF
9	Cc021531	RNA biosynthesis.transcription factor families.MYB superfamily.MYB	C3H
9	Cc021631	RNA biosynthesis.transcription factor families.bHLH transcription	bHLH
9	Cc021841	RNA biosynthesis.transcription factor families.MYB superfamily.MYB	MYB
9	Cc022668	RNA biosynthesis.transcription factor families.C2C2 superfamily.BBX/DBB	DBB
9	Cc022865	RNA biosynthesis.transcription factor families.WRKY transcription	WRKY
9	Cc023722	RNA biosynthesis.transcription factor families.MYB superfamily.MYB	MYB
9	Cc025846	RNA biosynthesis.transcription factor families.bZIP superfamily.bZIP	bZIP
9	Cc026281	RNA biosynthesis.transcription factor families.MYB superfamily.MYB-related	MYB
9	Cc026566	RNA biosynthesis.transcription factor families.GeBP transcription	GeBP
9	Cc026622	RNA biosynthesis.transcription factor families.NAC transcription	NAC
9	Cc026642	RNA biosynthesis.transcription factor families.C2H2 zinc finger	C2H2
9	Cc027104	RNA biosynthesis.transcription factor families.C2C2 superfamily.GATA	GATA
9	Cc027404	RNA biosynthesis.RNA polymerase II-dependent transcription.pre-initiation	NF-YC
9	Cc027482	RNA biosynthesis.transcription factor families.MADS box transcription	MIKC_MADS
9	Cc027929	RNA biosynthesis.transcription factor families.bZIP superfamily.bZIP	bZIP
9	Cc028022	RNA biosynthesis.transcription factor families.B3 superfamily.ARF	ARF
9	Cc028419	RNA biosynthesis.transcription factor families.bZIP superfamily.bZIP	bZIP
9	Cc028474	RNA biosynthesis.transcription factor families.MADS box transcription	MIKC_MADS
9	Cc028769	RNA biosynthesis.transcription factor families.AS2/LOB transcription	LBD
9	Cc029290	RNA biosynthesis.transcription factor families.C2C2 superfamily.GATA	GATA
9	Cc030273	RNA biosynthesis.transcription factor families.B3 superfamily.RAV/NGATHA	B3
9	Cc030628	RNA biosynthesis.transcription factor families.NAC transcription	NAC
9	Cc031034	RNA biosynthesis.transcription factor families.AS2/LOB transcription	LBD
9	Cc031349	RNA biosynthesis.transcription factor families.CAMTA transcription	CAMTA
9	Cc031637	RNA biosynthesis.transcription factor families.C2H2 zinc finger	C2H2
9	Cc031746	RNA biosynthesis.transcription factor families.CAMTA transcription	CAMTA
9	Cc032050	RNA biosynthesis.transcription factor families.NAC transcription	NAC
9	Cc032285	hypothetical protein	C3H
9	Cc033382	RNA biosynthesis.transcription factor families.AS2/LOB transcription	LBD
9	Cc033815	RNA biosynthesis.transcription factor families.B3 superfamily.LAV-VAL	B3
9	Cc034042	RNA biosynthesis.transcription factor families.NAC transcription	NAC
9	Cc034475	RNA biosynthesis.transcription factor families.BBR/BPC transcription	BBR-BPC
9	Cc034611	RNA biosynthesis.transcription factor families.GRF-GIF transcriptional	GRF
9	Cc034680	RNA biosynthesis.transcription factor families.MADS box transcription	MIKC_MADS
9	Cc034806	RNA biosynthesis.transcription factor families.MYB superfamily.MYB	MYB-related
9	Cc036383	RNA biosynthesis.transcription factor families.Trihelix transcription	Trihelix
9	Cc036606	RNA biosynthesis.transcription factor families.C2H2 zinc finger	C2H2
9	Cc036908	RNA biosynthesis.transcription factor families.HB (Homeobox)	ZF-HD
9	Cc037076	RNA biosynthesis.transcription factor families.MYB superfamily.MYB	MYB
9	Cc037636	RNA biosynthesis.transcription factor families.HRT transcription	HRT-like
9	Cc038577	RNA biosynthesis.transcription factor families.bHLH transcription	bHLH
9	Cc041474	RNA biosynthesis.transcription factor families.MYB superfamily.MYB	MYB
9	Cc041556	RNA biosynthesis.transcription factor families.WRKY transcription	WRKY
9	Cc041795	RNA biosynthesis.transcription factor families.WRKY transcription	WRKY
9	Cc044147	RNA biosynthesis.transcription factor families.C2H2 zinc finger	C2H2
9	Cc044230	RNA biosynthesis.transcription factor families.bZIP superfamily.bZIP	bZIP
9	Cc044285	RNA biosynthesis.transcription factor families.AP2/ERF superfamily.DREB-type	ERF
9	Cc044361	RNA biosynthesis.transcription factor families.C2H2 zinc finger	C2H2
9	Cc044420	hypothetical protein	ERF
9	Cc044772	RNA biosynthesis.transcription factor families.HSF (heat shock)	HSF
9	Cc044888	RNA biosynthesis.transcription factor families.bHLH transcription	bHLH
9	Cc045076	RNA biosynthesis.transcription factor families.C2H2 zinc finger	C2H2
9	Cc045582	RNA biosynthesis.transcription factor families.AP2/ERF superfamily.DREB-type	ERF
9	Cc045866	RNA biosynthesis.transcription factor families.AP2/ERF superfamily.AP2-type	AP2
9	Cc046263	Phytohormones.brassinosteroid.perception and signal transduction.BES/BZR-type	BES
9	Cc046710	RNA biosynthesis.transcription factor families.GRF-GIF transcriptional	GRF
9	Cc047411	RNA biosynthesis.transcription factor families.GRF-GIF transcriptional	GRF

## Sheet: cluster10
Cluster No.	Gene ID	Description	Family name
10	Cc000729	RNA biosynthesis.transcription factor families.bHLH transcription	bHLH
10	Cc000741	RNA biosynthesis.transcription factor families.SBP transcription	SBP
10	Cc000775	RNA biosynthesis.transcription factor families.WRKY transcription	WRKY
10	Cc000958	hypothetical protein	MYB
10	Cc001594	RNA biosynthesis.transcription factor families.C2C2 superfamily.BBX/CONSTANS	CO-like
10	Cc001800	RNA biosynthesis.transcription factor families.MYB superfamily.MYB	MYB
10	Cc002602	RNA biosynthesis.transcription factor families.AP2/ERF superfamily.DREB-type	ERF
10	Cc002622	RNA biosynthesis.transcription factor families.B3 superfamily.ARF	ARF
10	Cc002637	RNA biosynthesis.transcription factor families.B3 superfamily.ARF	ARF
10	Cc002638	RNA biosynthesis.transcription factor families.C2C2 superfamily.GATA	GATA
10	Cc002792	RNA biosynthesis.transcription factor families.SBP transcription	SBP
10	Cc003378	RNA biosynthesis.transcription factor families.C2H2 zinc finger	C2H2
10	Cc003411	RNA biosynthesis.transcription factor families.HB (Homeobox)	HD-ZIP
10	Cc004012	RNA biosynthesis.transcription factor families.C3H zinc finger	C3H
10	Cc004029	RNA biosynthesis.transcription factor families.bZIP superfamily.bZIP	bZIP
10	Cc004117	RNA biosynthesis.transcription factor families.NF-Y transcription	NF-Y
10	Cc004207	RNA biosynthesis.RNA polymerase I-dependent transcription.TTF1	MYB-related
10	Cc004242	RNA biosynthesis.transcription factor families.SBP transcription	SBP
10	Cc004432	RNA biosynthesis.transcription factor families.AP2/ERF superfamily.ERF-type	ERF
10	Cc004518	RNA biosynthesis.transcription factor families.NAC transcription	NAC
10	Cc004537	RNA biosynthesis.transcription factor families.MYB superfamily.MYB	MYB
10	Cc004907	RNA biosynthesis.transcription factor families.bHLH transcription	bHLH
10	Cc004940	RNA biosynthesis.transcription factor families.B3 superfamily.RAV/NGATHA	B3
10	Cc005037	Phytohormones.ethylene.perception and signal transduction.EIN3-type	EIL
10	Cc005168	RNA biosynthesis.transcription factor families.MYB superfamily.MYB	MYB
10	Cc005671	RNA biosynthesis.transcription factor families.C2H2 zinc finger	C2H2
10	Cc006090	RNA biosynthesis.transcription factor families.C2C2 superfamily.DOF	Dof
10	Cc006335	RNA biosynthesis.transcription factor families.SBP transcription	SBP
10	Cc007526	RNA biosynthesis.transcription factor families.FAR1 transcription	FAR1
10	Cc007620	RNA biosynthesis.transcription factor families.bZIP superfamily.bZIP	bZIP
10	Cc008098	RNA biosynthesis.transcription factor families.C2H2 zinc finger	C2H2
10	Cc008453	RNA biosynthesis.transcription factor families.bHLH transcription	bHLH
10	Cc008555	RNA biosynthesis.transcription factor families.B3 superfamily.ARF	ARF
10	Cc008622	RNA biosynthesis.transcription factor families.B3 superfamily.ARF	ARF
10	Cc008754	RNA biosynthesis.transcription factor families.bHLH transcription	bHLH
10	Cc009284	RNA biosynthesis.transcription factor families.MYB superfamily.G2-like	G2-like
10	Cc009939	RNA biosynthesis.transcription factor families.bHLH transcription	bHLH
10	Cc009987	RNA biosynthesis.transcription factor families.C2C2 superfamily.BBX/DBB	DBB
10	Cc010143	RNA biosynthesis.transcription factor families.MADS box transcription	MIKC_MADS
10	Cc010210	RNA biosynthesis.transcription factor families.bZIP superfamily.bZIP	bZIP
10	Cc011041	RNA biosynthesis.transcription factor families.SBP transcription	SBP
10	Cc011197	RNA biosynthesis.transcription factor families.WRKY transcription	WRKY
10	Cc011657	RNA biosynthesis.transcription factor families.bHLH transcription	bHLH
10	Cc011970	RNA biosynthesis.transcription factor families.FAR1 transcription	FAR1
10	Cc012441	RNA biosynthesis.transcription factor families.HB (Homeobox)	HD-ZIP
10	Cc013688	RNA biosynthesis.transcription factor families.TCP transcription	TCP
10	Cc013990	RNA biosynthesis.transcription factor families.bHLH transcription	bHLH
10	Cc014119	RNA biosynthesis.transcription factor families.HB (Homeobox)	ZF-HD
10	Cc014497	RNA biosynthesis.transcription factor families.AP2/ERF superfamily.ERF-type	ERF
10	Cc014554	RNA biosynthesis.transcription factor families.AP2/ERF superfamily.DREB-type	ERF
10	Cc014564	RNA biosynthesis.transcription factor families.C3H zinc finger	C3H
10	Cc014733	Protein translocation.nucleus.nucleocytoplasmic transport.nuclear	C3H
10	Cc014815	RNA biosynthesis.transcription factor families.Trihelix transcription	Trihelix
10	Cc015044	RNA biosynthesis.transcription factor families.bHLH transcription	bHLH
10	Cc016067	RNA biosynthesis.transcription factor families.C3H zinc finger	C3H
10	Cc016272	RNA biosynthesis.transcription factor families.GRF-GIF transcriptional	GRF
10	Cc016720	RNA biosynthesis.transcription factor families.HB (Homeobox)	HB-other
10	Cc017063	RNA biosynthesis.transcription factor families.bZIP superfamily.bZIP	bZIP
10	Cc017248	hypothetical protein	CO-like
10	Cc017249	RNA biosynthesis.transcription factor families.C2C2 superfamily.BBX/CONSTANS	CO-like
10	Cc017519	RNA biosynthesis.transcription factor families.B3 superfamily.ARF	ARF
10	Cc017520	RNA biosynthesis.transcription factor families.C2C2 superfamily.GATA	GATA
10	Cc017702	RNA biosynthesis.transcription factor families.AP2/ERF superfamily.DREB-type	ERF
10	Cc018085	RNA biosynthesis.transcription factor families.TCP transcription	TCP
10	Cc018571	RNA biosynthesis.transcription factor families.bHLH transcription	bHLH
10	Cc019675	RNA biosynthesis.transcription factor families.MYB superfamily.MYB	MYB
10	Cc019692	RNA biosynthesis.transcription factor families.NAC transcription	NAC
10	Cc019788	RNA biosynthesis.transcription factor families.AP2/ERF superfamily.ERF-type	ERF
10	Cc019940	RNA biosynthesis.transcription factor families.C2C2 superfamily.BBX/CONSTANS	CO-like
10	Cc020028	RNA biosynthesis.transcription factor families.MYB superfamily.MYB	MYB-related
10	Cc020081	Phytohormones.cytokinin.perception and signal transduction.B-type	ARR-B
10	Cc020368	RNA biosynthesis.transcription factor families.HB (Homeobox)	HB-other
10	Cc020386	RNA biosynthesis.transcription factor families.WRKY transcription	WRKY
10	Cc020854	RNA biosynthesis.transcription factor families.bZIP superfamily.bZIP	bZIP
10	Cc020935	RNA biosynthesis.transcription factor families.NF-Y transcription	NF-Y
10	Cc021191	RNA biosynthesis.transcription factor families.MYB superfamily.MYB	MYB-related
10	Cc022051	RNA biosynthesis.transcription factor families.NAC transcription	NAC
10	Cc022287	Phytohormones.ethylene.perception and signal transduction.EIN3-type	EIL
10	Cc022492	RNA biosynthesis.transcription factor families.HB (Homeobox)	HB-other
10	Cc022874	RNA biosynthesis.transcription factor families.MADS box transcription	MIKC_MADS
10	Cc022903	RNA biosynthesis.transcription factor families.Trihelix transcription	Trihelix
10	Cc022934	RNA biosynthesis.transcription factor families.TCP transcription	TCP
10	Cc023023	RNA biosynthesis.transcription factor families.B3 superfamily.RAV/NGATHA	RAV
10	Cc023375	RNA biosynthesis.transcription factor families.FAR1 transcription	FAR1
10	Cc023510	RNA biosynthesis.transcription factor families.MYB superfamily.MYB	MYB
10	Cc023767	RNA biosynthesis.transcription factor families.HB (Homeobox)	ZF-HD
10	Cc023910	RNA biosynthesis.transcription factor families.MYB superfamily.MYB	MYB
10	Cc024654	RNA biosynthesis.transcription factor families.C2H2 zinc finger	C2H2
10	Cc025310	RNA biosynthesis.transcription factor families.bHLH transcription	bHLH
10	Cc025812	RNA biosynthesis.transcription factor families.C2C2 superfamily.BBX/CONSTANS	CO-like
10	Cc025848	hypothetical protein	G2-like
10	Cc026627	RNA biosynthesis.transcription factor families.MYB superfamily.MYB	MYB
10	Cc027537	RNA biosynthesis.transcription factor families.WRKY transcription	WRKY
10	Cc027554	RNA biosynthesis.transcription factor families.AP2/ERF superfamily.DREB-type	ERF
10	Cc027561	RNA biosynthesis.transcription factor families.SBP transcription	SBP
10	Cc027723	hypothetical protein	SRS
10	Cc028312	RNA biosynthesis.transcription factor families.NF-Y transcription	NF-YA
10	Cc029977	RNA biosynthesis.transcription factor families.AP2/ERF superfamily.ERF-type	AP2
10	Cc030029	RNA biosynthesis.transcription factor families.bHLH transcription	bHLH
10	Cc030098	RNA biosynthesis.transcription factor families.C2C2 superfamily.BBX/DBB	DBB
10	Cc030142	RNA biosynthesis.transcription factor families.Trihelix transcription	Trihelix
10	Cc030508	RNA biosynthesis.transcription factor families.C2C2 superfamily.BBX/CONSTANS	CO-like
10	Cc030587	hypothetical protein	ARF
10	Cc030624	RNA biosynthesis.transcription factor families.MYB superfamily.MYB	MYB
10	Cc030940	RNA biosynthesis.transcription factor families.AS2/LOB transcription	LBD
10	Cc030959	RNA biosynthesis.transcription factor families.bHLH transcription	bHLH
10	Cc031484	RNA biosynthesis.transcription factor families.MYB superfamily.MYB	MYB
10	Cc031573	RNA biosynthesis.transcription factor families.NAC transcription	NAC
10	Cc032522	RNA biosynthesis.transcription factor families.bHLH transcription	bHLH
10	Cc032535	RNA biosynthesis.transcription factor families.bHLH transcription	bHLH
10	Cc032567	RNA biosynthesis.transcription factor families.B3 superfamily.RAV/NGATHA	B3
10	Cc033847	RNA biosynthesis.transcription factor families.Trihelix transcription	Trihelix
10	Cc034270	RNA biosynthesis.transcription factor families.C2C2 superfamily.DOF	Dof
10	Cc034285	Phytohormones.gibberellin.perception and signal transduction.DELLA-type	GRAS
10	Cc034515	RNA biosynthesis.transcription factor families.bHLH transcription	bHLH
10	Cc034647	RNA biosynthesis.transcription factor families.AS2/LOB transcription	LBD
10	Cc034972	RNA biosynthesis.transcription factor families.bHLH transcription	bHLH
10	Cc035894	RNA biosynthesis.transcription factor families.MYB superfamily.MYB	MYB
10	Cc036604	RNA biosynthesis.transcription factor families.B3 superfamily.ARF	ARF
10	Cc036925	RNA biosynthesis.transcription factor families.C2H2 zinc finger	C2H2
10	Cc037110	RNA biosynthesis.transcription factor families.bHLH transcription	bHLH
10	Cc037657	RNA biosynthesis.transcription factor families.AP2/ERF superfamily.DREB-type	ERF
10	Cc037689	RNA biosynthesis.transcription factor families.bHLH transcription	bHLH
10	Cc037893	RNA biosynthesis.transcription factor families.HB (Homeobox)	HB-other
10	Cc042073	RNA biosynthesis.transcription factor families.bHLH transcription	bHLH
10	Cc043996	RNA biosynthesis.transcription factor families.C2H2 zinc finger	C2H2
10	Cc044021	RNA biosynthesis.transcription factor families.bHLH transcription	bHLH
10	Cc044118	RNA biosynthesis.transcription factor families.AP2/ERF superfamily.DREB-type	ERF
10	Cc044477	RNA biosynthesis.transcription factor families.C2C2 superfamily.BBX/CONSTANS	CO-like
10	Cc044559	RNA biosynthesis.transcription factor families.MYB superfamily.MYB	MYB
10	Cc044602	RNA biosynthesis.transcription factor families.MYB superfamily.MYB	MYB
10	Cc044607	Phytohormones.cytokinin.perception and signal transduction.B-type	ARR-B
10	Cc044871	RNA biosynthesis.transcription factor families.MYB superfamily.G2-like	ARR-B
10	Cc045075	RNA biosynthesis.transcription factor families.B3 superfamily.RAV/NGATHA	RAV
10	Cc045165	RNA biosynthesis.transcription factor families.TCP transcription	TCP
10	Cc045269	RNA biosynthesis.transcription factor families.TCP transcription	TCP
10	Cc045700	RNA biosynthesis.transcription factor families.AP2/ERF superfamily.DREB-type	ERF
10	Cc046193	RNA biosynthesis.transcription factor families.C2C2 superfamily.BBX/CONSTANS	CO-like
10	Cc046794	RNA biosynthesis.transcription factor families.GRAS transcription	GRAS
10	Cc046886	RNA biosynthesis.transcription factor families.WRKY transcription	WRKY
10	Cc047362	RNA biosynthesis.transcription factor families.FAR1 transcription	FAR1
10	Cc047507	RNA biosynthesis.transcription factor families.bHLH transcription	bHLH

[truncated: 2 more sheets: cluster11, cluster12]
