# Supplementary material for: Regulatory Modules Involved in the Degradation and Modification of Host Cell Walls During Cuscuta campestris Invasion
Source: Front Plant Sci. 2022 Jul 6;13:904313. doi: 10.3389/fpls.2022.904313 (PMC9298654; doi:10.3389/fpls.2022.904313)
Supplement: Supplementary file 6 [file Table_5.XLSX]

## Sheet: Sheet1
Supplemental Table 5. Characterization of Arabidopsis orthologues (e-value <1e-5) of the C. campestris TFs in cluster 2 and 9.
Cluster	Gene_ID	AGI*	Symbol	Description**
2	Cc000493	AT3G12680	HUA1	Functions in floral reproductive organ identity by binding AGAMOUS pre-mRNA and promoting its processing.
2	Cc003611	AT4G21750	ATML1	Probable transcription factor involved in cell specification and pattern formation during embryogenesis.
2	Cc004347	AT5G25830	GATA12	Transcription activator involved in xylem formation.
2	Cc006698	AT5G44210	ERF9	Involved in the regulation of gene expression by stress factors and by components of stress signal transduction pathways.
2	Cc008201	AT1G07900	LBD1
2	Cc008537	AT5G04410	NAC078	Plays a role in the regulation of 20S and 26S proteasomes in response to high light stress
2	Cc008641	AT3G10490	NAC052	Required during pollen development
2	Cc009308	AT3G20840	PLT1	Master regulator of basal/root fate.
2	Cc011171	AT5G58010	LRL3	Transcription factor that regulates the development of root hairs
2	Cc011280	AT3G50700	GAF1	Transcription factor that acts as a positive regulator of gibberellin (GA) action, homeostasis and signaling.
2	Cc012114	AT3G58710	WRKY69
2	Cc012129	AT3G58710	WRKY69
2	Cc012479	AT3G28470	MYB35	Required for anther development and early tapetal function during microspore maturation
2	Cc013133	AT1G07900	LBD1
2	Cc014485	AT5G47390	KUA1	Plays a critical role in developmentally regulated and dark-induced onset of leaf senescence.
2	Cc017015	AT1G31320	LBD4
2	Cc017133	AT4G18170	WRKY28
2	Cc018989	AT3G12680	HUA1	Functions in floral reproductive organ identity by binding AGAMOUS pre-mRNA and promoting its processing.
2	Cc019494	AT1G31320	LBD4
2	Cc020413	AT5G58010	LRL3	Transcription factor that regulates the development of root hairs
2	Cc020596	AT1G69560	MYB105	Functions in both lateral organ separation and axillary meristem formation.
2	Cc020693	AT3G48590	NFYC1
2	Cc021893	AT3G54320	WRI1	Transcriptional activator involved in the activation of a subset of sugar-responsive genes.
2	Cc022128	AT5G53660	GRF7	Transcription activator that plays a role in the regulation of cell expansion in leaf and cotyledons tissues.
2	Cc022314	AT5G57620	MYB36	Transcription factors that regulate the transition from proliferation to differentiation in root endodermis
2	Cc023019	AT1G68640	PAN	Transcriptional activator involved in the determination of floral organ number.
2	Cc023874	AT5G66350	SHI	Promotes style and stigma formation, and influences vascular development during gynoecium development.
2	Cc023877	AT4G32890	GATA9
2	Cc024049	AT1G21910	ERF012	Involved in salt and osmotic stress response pathways.
2	Cc024830	AT1G69560	MYB105	Functions in both lateral organ separation and axillary meristem formation.
2	Cc025193	AT1G75250	RL6
2	Cc027047	AT3G22780	TSO1	Regulates the floral meristem cell division and the inflorescence meristem organization.
2	Cc027208	AT5G25190	ERF003
2	Cc027657	AT4G15090	FAR1	Activates the expression of FHY1 and FHL involved in light responses.
2	Cc035099	AT5G66350	SHI	Promotes style and stigma formation, and influences vascular development during gynoecium development.
2	Cc036239	AT4G00220	LBD30	Involved in the positive regulation of tracheary element differentiation.
2	Cc037238	AT2G40340	DREB2C	Binding to the C-repeat/DRE element mediates high salinity- and abscisic acid-inducible transcription.
2	Cc037250	AT2G40340	DREB2C	Binding to the C-repeat/DRE element mediates high salinity- and abscisic acid-inducible transcription.
2	Cc040061	AT2G28450
2	Cc040062	AT2G28450
2	Cc041664	AT3G58710	WRKY69
2	Cc044512	AT1G27370	SPL10
2	Cc045722	AT5G56780	ET2	Transcriptional regulator required for the induction of dormancy during late seed development.
2	Cc046124	AT5G10510	AIL6
2	Cc046154	AT1G34370	STOP1	Plays a critical role in tolerance to major stress factors in acid soils.
2	Cc047271	AT5G56930
9	Cc000086	AT1G34670	MYB93	Transcription factor that acts as negative regulator of lateral root development.
9	Cc000379	AT4G27410	NAC072	Strongly induced by drought, high salinity and abscisic acid.
9	Cc001018	AT2G30470	VAL1	Plays an essential role in regulating the transition from seed maturation to seedling growth
9	Cc001310	AT5G05660	NFXL2	Enhanced growth and survival under water or salt stress.
9	Cc001593	AT1G67100	LBD40
9	Cc001912	AT4G18170	WRKY28
9	Cc002540	AT5G51190	ERF105
9	Cc002626	AT5G03150	JKD	Transcription factor that regulates tissue boundaries and asymmetric cell division by a rapid up-regulation of SCR.
9	Cc002873	AT4G04450	WRKY42	Modulates phosphate homeostasis and Pi translocation.
9	Cc003075	AT4G32890	GATA9
9	Cc003190	AT5G25190	ERF003
9	Cc004013	AT1G28370	ERF11	Involved in the regulation of gene expression by components of stress signal transduction pathways.
9	Cc004244	AT1G02040
9	Cc004251	AT1G08465	YAB2
9	Cc004836	AT2G37740	ZFP10
9	Cc005069	AT3G54320	WRI1	Transcriptional activator involved in the activation of a subset of sugar-responsive genes.
9	Cc005247	AT1G06180	MYB13	Functions as component of a regulatory network controlling the establishment and/or development of the shoot system.
9	Cc005829	AT1G62990	KNAT7	May be involved in secondary cell wall biosynthesis.
9	Cc006548	AT1G59750	ARF1	Formation of heterodimers with Aux/IAA proteins may alter their ability to modulate early auxin response genes expression.
9	Cc007125	AT1G59750	ARF1	Formation of heterodimers with Aux/IAA proteins may alter their ability to modulate early auxin response genes expression.
9	Cc008000	AT2G40950	BZIP17	Transcriptional activator involved in salt and osmotic stress responses.
9	Cc008347	AT4G38620	MYB4	Transcription repressor involved in regulation of protection against UV.
9	Cc008813	AT1G03790	TZF4	Probable transcription repressor that functions as negative regulator of phytochrome-mediated promotion of seed germination.
9	Cc008960	AT1G59640	BPE	Involved in the control of petal size.
9	Cc009134	AT1G62990	KNAT7	May be involved in secondary cell wall biosynthesis.
9	Cc009830	AT4G38620	MYB4	Transcription repressor involved in regulation of protection against UV.
9	Cc011548	AT4G18770	MYB98	Involved in pollen tube guidance to the micropyle
9	Cc011998	AT4G04450	WRKY42	Modulates phosphate homeostasis and Pi translocation.
9	Cc012271	AT4G30080	ARF16
9	Cc013241	AT1G32770	NAC012	Transcriptional activator of genes involved in biosynthesis of secondary walls.
9	Cc013311	AT1G32770	NAC012	Transcriptional activator of genes involved in biosynthesis of secondary walls.
9	Cc013352	AT3G12720
9	Cc013895	AT2G28350	ARF10
9	Cc014070	AT3G50060	MYB77	Functions in auxin signal transduction and modulates lateral root growth.
9	Cc014696	AT1G09540	MYB61	Transcription factor that is required for xylem formation and xylem cell differentiation, and lateral root formation
9	Cc014936	AT2G30130	LBD12
9	Cc015165	AT2G30470	VAL1	Plays an essential role in regulating the transition from seed maturation to seedling growth
9	Cc015995	AT1G16490
9	Cc016756	AT2G32460	MYB101	Involved in pollen grain development
9	Cc017463	AT5G11050	MYB64	Transcription factor required for female gametophyte fertility
9	Cc017674	AT1G75710
9	Cc017815	AT2G36080	ARF31
9	Cc019108	AT4G27410	NAC072	Strongly induced by drought, high salinity and abscisic acid.
9	Cc019888	AT5G13910	LEP	Cell division-promoting factor involved in leaf blade differentiation, inflorescence branching, carpel and silique shape.
9	Cc019979	AT1G27370	SPL10
9	Cc020140	AT3G24120	PHL2	A component of the central regulatory system controlling transcriptional responses to Pi starvation
9	Cc020277	AT5G28040
9	Cc020407	AT3G12480
9	Cc020775	AT4G28110	MYB41	Transcription factor involved in salt stress response.
9	Cc020837	AT1G28370	ERF11	Involved in the regulation of gene expression by components of stress signal transduction pathways.
9	Cc021531	AT2G36890	RAX2	Positively regulates axillary meristems formation and development.
9	Cc021631	AT1G59640	BPE	Involved in the control of petal size.
9	Cc021841	AT3G23250	MYB15	Involved in drought and salt tolerance.
9	Cc022668	AT4G38960	BBX19	Acts as negative regulator of seedling photomorphogenesis.
9	Cc022865	AT4G18170	WRKY28
9	Cc023722	AT3G50060	MYB77	Functions in auxin signal transduction and modulates lateral root growth.
9	Cc026281	AT5G08520	SRM1	Transcription activator that coordinates abscisic acid biosynthesis and signaling-related genes.
9	Cc026566	AT5G28040
9	Cc026622	AT1G69490	NAC029	Promotes chlorophyll degradation in leaves by enhancing transcription of AAO3.
9	Cc026642	AT1G26610
9	Cc027104	AT4G32890	GATA9
9	Cc027404	AT3G56660	BZIP49
9	Cc027482	AT4G09960	AGL11	Is required, together with TT16/AGL32 for the maternal control of endothelium formation.
9	Cc027929	AT1G06070	AtbZIP69
9	Cc028022	AT2G28350	ARF10
9	Cc028419	AT1G08320	TGA9	Required for signaling responses to pathogen-associated molecular patterns (PAMPs).
9	Cc028474	AT4G09960	AGL11	Is required, together with TT16/AGL32 for the maternal control of endothelium formation.
9	Cc028769	AT2G30130	LBD12
9	Cc029290	AT4G32890	GATA9
9	Cc030273	AT2G36080	ARF31
9	Cc030628	AT1G69490	NAC029	Promotes chlorophyll degradation in leaves by enhancing transcription of AAO3.
9	Cc031034	AT1G16530	LBD3
9	Cc031349	AT4G16150	CAMTA5	Involved in response to cold.
9	Cc031637	AT2G37740	ZFP10
9	Cc031746	AT3G16940	CAMTA6
9	Cc033382	AT1G16530	LBD3
9	Cc033815	AT4G32010	VAL2	Transcriptional repressor of gene expression involved in embryonic pathways
9	Cc034042	AT5G08790	NAC081	Involved in disease resistance response.
9	Cc034475	AT5G42520	BPC6	Transcriptional regulator that binds to regulatory sequences of genes involved in developmental processes.
9	Cc034611	AT4G37740	GRF2	Transcription activator that plays a role in the regulation of cell expansion in leaf and cotyledons tissues.
9	Cc034806	AT4G12350	MYB42
9	Cc036383	AT3G10000	EDA31
9	Cc036606	AT5G03150	JKD	Transcription factor that regulates tissue boundaries and asymmetric cell division by a rapid up-regulation of SCR.
9	Cc036908	AT3G50890	ZHD7
9	Cc037076	AT4G28110	MYB41	Transcription factor involved in salt stress response.
9	Cc037636	AT1G27740	RSL4	Controls root hair cell growth.
9	Cc038577	AT1G27740	RSL4	Controls root hair cell growth.
9	Cc041474	AT4G28110	MYB41	Transcription factor involved in salt stress response.
9	Cc041556	AT4G04450	WRKY42	Modulates phosphate homeostasis and Pi translocation.
9	Cc041795	AT4G18170	WRKY28
9	Cc044147	AT1G75710
9	Cc044230	AT2G35530	BZIP16	DNA-binding activity is redox-dependent
9	Cc044285	AT2G40340	DREB2C	Binding to the C-repeat/DRE element mediates high salinity- and abscisic acid-inducible transcription.
9	Cc044361	AT5G04390
9	Cc044420	AT5G13910	LEP	Cell division-promoting factor involved in leaf blade differentiation, inflorescence branching, carpel and silique shape.
9	Cc044888	AT1G32640	MYC2	Common transcription factor of light, abscisic acid, and jasmonic acid signaling pathways.
9	Cc045076	AT1G13290	WIP6	Involved in leaf vasculature patterning
9	Cc045582	AT4G39780	ERF060
9	Cc045866	AT4G37750	ANT	Required for the initiation and growth of ovules integumenta, and for the development of female gametophyte.
9	Cc046263	AT1G75080	BZR1	Modulates ovule initiation and development.
9	Cc046710	AT5G53660	GRF7	Transcription activator that plays a role in the regulation of cell expansion in leaf and cotyledons tissues.
9	Cc047411	AT4G37740	GRF2	Transcription activator that plays a role in the regulation of cell expansion in leaf and cotyledons tissues.
* Arabidopsis TF with top hit to the C. campestris TF with e-value <1e-5.
** Description is based on UniPro (https://www.uniprot.org).
