# Supplementary material for: Regulatory Modules Involved in the Degradation and Modification of Host Cell Walls During Cuscuta campestris Invasion
Source: Front Plant Sci. 2022 Jul 6;13:904313. doi: 10.3389/fpls.2022.904313 (PMC9298654; doi:10.3389/fpls.2022.904313)
Supplement: Supplementary file 7 [file Table_6.XLSX]

## Sheet: Sheet1
Supplementary Table 6: List of the C. campestris orthologues of tomato abscission-associated regulators.
Symbol	Sl ID	Description	Cc ID*	Expression level (the mean of TPM from RNA-seq data)**
				control	0 hac	12 hac	42 hac	54 hac
Jointless	Solyc11g010570	Abscission zone formation	Cc041640	34.275	25.7293	33.6092	36.1898	31.6068
			Cc012088	41.7519	26.244	24.5064	25.6163	18.5152
MADS-MC	Solyc05g056620	Abscission zone formation	Cc031700	1.29879	1.1114	0.173344	1.04745	0.193123
			Cc004897	0.357762	0.328485	0.270893	0.534853	0.054667
SIMBP21	Solyc12g038510	Abscission zone formation	Cc033511	2.10699	1.30554	5.04398	3.29925	6.13485
			Cc025518	5.84261	3.36523	11.8278	9.17662	6.94173
LeWUS	Solyc02g083950	Abscission zone formation	Cc031700	n.d.	n.d.	n.d.	n.d.	n.d.
		Maintenance and prolification of undifferentiated cells	Cc004897	n.d.	n.d.	n.d.	n.d.	n.d.
Ls	Solyc07g066250	Abscission zone formation	Cc000511	n.d.	n.d.	n.d.	n.d.	n.d.
		Maintenance and prolification of undifferentiated cells	Cc018973	n.d.	n.d.	n.d.	n.d.	n.d.
GOB	Solyc07g062840	Abscission zone formation	Cc035862	0.046267	0.082738	0.060544	0.117512	0.102399
		Maintenance and prolification of undifferentiated cells	Cc035983	0.105356	0.066539	0.043945	0.152069	0.155482
Bl	Solyc11g069030	Abscission zone formation	Cc024590	0.163705	0.231608	0.292466	1.02241	0.402881
		Maintenance and prolification of undifferentiated cells	Cc017538	0.1766	0.125058	0.072984	4.46258	2.65953
SlREV	Solyc11g069470	Abscission zone formation	Cc017517	2.90058	6.81968	21.0281	24.5224	28.7378
		Maintenance and prolification of undifferentiated cells	Cc002635	1.93676	7.84062	18.2323	18.5124	22.1142
KD1	Solyc06g072480	Signals initiating abscission	Cc030963	136.768	82.2612	6.1846	0.026307	0.162151
			Cc013984	147.729	80.5909	5.30412	0	0.04765
*C. campestris TFs with top-2 hit to the S. lycopersicum TF.
**Control, tissue region containing epidermal and cortical cells of C. campestris without contact with the host; hac, hours after coiling
